# Supplementary material for: Mechanistic insights into lysine-targeting covalent inhibition through a theoretical study of ester aminolysis
Source: Royal Society of Chemistry journal article supplement (doi:10.1039/d1ob01963e), 2021-01-01
Supplement: d1ob01963e1.pdf [file d1ob01963e1.pdf]

## Electronic Supplementary Information

### Mechanistic insights into lysine-targeting covalent inhibition through a theoretical study of ester aminolysis

Volkan Fındık<sup>a,b</sup>, Manuel F. Ruiz-López<sup>\*a</sup>, and Safiye Sag Erdem<sup>\*b</sup>

<sup>a</sup> LPCT, UMR 7019, University of Lorraine, CNRS, 54000 Nancy, France

<sup>b</sup> Department of Chemistry, Faculty of Arts and Sciences, Marmara University, 34722 Istanbul, Turkey

**Table S1.** Cartesian coordinates of stationary points for the reaction of methyamine with methylacetate in water. Optimized geometries at the B3LYP/6-311+G(d,p) level.

| RC                                       |             |             |             |
|------------------------------------------|-------------|-------------|-------------|
| C                                        | -3.21667500 | 0.07778900  | -0.75102600 |
| O                                        | -4.00931000 | -0.93815800 | -1.06448900 |
| N                                        | 5.14041700  | -1.54370100 | -0.51434900 |
| O                                        | -2.34063700 | 0.00260000  | 0.10423300  |
| H                                        | 4.53380100  | -0.83666400 | -0.09852500 |
| H                                        | 5.96620300  | -1.60102500 | 0.07405100  |
| O                                        | -0.61289400 | 2.06317700  | 0.92915500  |
| H                                        | -1.10465400 | 2.81688500  | 1.27550900  |
| H                                        | -1.28215000 | 1.42025900  | 0.61562800  |
| O                                        | 1.57980900  | 2.42062300  | -0.80890600 |
| H                                        | 0.77577100  | 2.40176600  | -0.25285300 |
| H                                        | 1.79622200  | 3.35223700  | -0.92367100 |
| O                                        | -0.75399100 | -1.75543100 | 1.76234400  |
| H                                        | -1.39692500 | -1.27358400 | 1.21343900  |
| H                                        | -1.27422200 | -2.20765500 | 2.43574300  |
| O                                        | 1.06002900  | 0.29399400  | 2.47712700  |
| H                                        | 0.51780100  | 1.01448900  | 2.10964500  |
| H                                        | 0.51204800  | -0.49969300 | 2.32088500  |
| O                                        | 3.24809000  | 0.63741100  | 0.69637200  |
| H                                        | 2.56592500  | 0.41885300  | 1.36146300  |
| H                                        | 2.79811300  | 1.27418600  | 0.11162800  |
| C                                        | -3.52671400 | 1.32180700  | -1.52931000 |
| H                                        | -2.60316500 | 1.85287000  | -1.75746800 |
| H                                        | -4.07065500 | 1.09198600  | -2.44326500 |
| H                                        | -4.14747800 | 1.97194500  | -0.90581300 |
| C                                        | 5.52411200  | -1.14277000 | -1.87498500 |
| H                                        | 4.62934900  | -1.07651800 | -2.49943500 |
| H                                        | 6.04691300  | -0.17714900 | -1.93575400 |
| H                                        | 6.17440200  | -1.90283500 | -2.31609500 |
| C                                        | -3.83912300 | -2.18446500 | -0.34459300 |
| H                                        | -4.59624500 | -2.85049500 | -0.74827500 |
| H                                        | -2.84294300 | -2.58674200 | -0.52475800 |
| H                                        | -3.99940100 | -2.02510100 | 0.72116800  |
| <b>TS (RC-T<sub>1</sub><sup>‡</sup>)</b> |             |             |             |
| C                                        | -1.21295800 | -0.43361000 | -0.64731300 |
| O                                        | -2.59759000 | -0.37371400 | -0.73727500 |
| N                                        | -0.96806300 | -0.51023700 | 1.19465600  |

|   |             |             |             |
|---|-------------|-------------|-------------|
| O | -0.53677900 | 0.59081000  | -1.00822100 |
| H | 0.03885300  | -0.67285800 | 1.34852900  |
| H | -1.14642800 | 0.44873200  | 1.49036800  |
| O | 2.04358400  | 0.55492000  | -1.70115800 |
| H | 2.16057100  | 0.88015800  | -2.60048900 |
| H | 1.06254400  | 0.53154600  | -1.52711300 |
| O | 3.05614100  | -1.81636200 | -0.67056900 |
| H | 2.80640800  | -1.01264100 | -1.17373400 |
| H | 4.00841000  | -1.91264500 | -0.77961000 |
| O | -0.19096100 | 2.64397300  | 0.70702900  |
| H | -0.41003100 | 2.00951100  | -0.01765100 |
| H | -0.54308000 | 3.49975800  | 0.44014200  |
| O | 2.51039400  | 1.86577600  | 0.81841300  |
| H | 2.55290100  | 1.55727200  | -0.10487000 |
| H | 1.63112200  | 2.29029900  | 0.87331200  |
| O | 1.94466900  | -0.77448300 | 1.72702000  |
| H | 2.19489700  | 0.15662100  | 1.55691300  |
| H | 2.38221300  | -1.26442500 | 1.00441100  |
| C | -0.76085500 | -1.81542800 | -1.08177800 |
| H | 0.27860500  | -1.98254500 | -0.80084400 |
| H | -1.38778100 | -2.59869400 | -0.65616300 |
| H | -0.84020100 | -1.86433300 | -2.17080500 |
| C | -1.78697500 | -1.45592800 | 1.97571400  |
| H | -1.49566000 | -2.47634000 | 1.72917000  |
| H | -1.64810600 | -1.29990100 | 3.04796100  |
| H | -2.83769100 | -1.31504000 | 1.72434300  |
| C | -3.19846700 | 0.92668800  | -0.70344400 |
| H | -4.26258800 | 0.76312200  | -0.86513200 |
| H | -3.05404100 | 1.41034600  | 0.26707000  |
| H | -2.79461300 | 1.56602300  | -1.48937800 |

**T<sub>1</sub><sup>±</sup>**

|   |             |             |             |
|---|-------------|-------------|-------------|
| C | -1.18532800 | -0.44065500 | -0.54407700 |
| O | -2.58959900 | -0.35467400 | -0.71704000 |
| N | -0.98645800 | -0.47303400 | 1.10998600  |
| O | -0.48705600 | 0.57865100  | -0.96739200 |
| H | 0.03066700  | -0.59817800 | 1.28898600  |
| H | -1.19973900 | 0.47954900  | 1.41027800  |
| O | 2.04448100  | 0.46542700  | -1.69742200 |
| H | 2.14848800  | 0.73574300  | -2.61611900 |
| H | 1.06047200  | 0.46634400  | -1.50045400 |
| O | 3.00926800  | -1.86902200 | -0.56874600 |
| H | 2.77793400  | -1.08115800 | -1.10673000 |
| H | 3.96482800  | -1.96865100 | -0.63922300 |
| O | -0.14007100 | 2.66630000  | 0.64625600  |
| H | -0.34862200 | 1.98369400  | -0.04660700 |
| H | -0.50544300 | 3.50080800  | 0.33422600  |
| O | 2.54118900  | 1.86611100  | 0.76250200  |
| H | 2.57646000  | 1.52742600  | -0.15083100 |
| H | 1.67262300  | 2.31532600  | 0.80267900  |
| O | 1.82142500  | -0.70652100 | 1.71726300  |
| H | 2.12908300  | 0.20611700  | 1.53435600  |
| H | 2.28372900  | -1.24287000 | 1.04316000  |
| C | -0.76970800 | -1.81919700 | -1.04806000 |
| H | 0.25751900  | -2.04152700 | -0.75642100 |
| H | -1.43045200 | -2.60619500 | -0.68297800 |
| H | -0.82586000 | -1.80065300 | -2.13782400 |
| C | -1.77599400 | -1.44758700 | 1.90208700  |
| H | -1.43356700 | -2.45539800 | 1.67653700  |
| H | -1.63479300 | -1.24994000 | 2.96480500  |
| H | -2.82805700 | -1.34972300 | 1.64347800  |
| C | -3.16577800 | 0.95380400  | -0.67941100 |
| H | -4.22200000 | 0.81920400  | -0.90939700 |
| H | -3.07868200 | 1.41335100  | 0.31151100  |
| H | -2.70564100 | 1.60961100  | -1.41993700 |

**T<sub>2</sub><sup>±</sup>**

|   |             |             |             |
|---|-------------|-------------|-------------|
| C | -1.18537100 | -0.44062800 | -0.54408100 |
| O | -2.58964600 | -0.35461100 | -0.71699100 |
| N | -0.98645700 | -0.47310100 | 1.10997900  |

|   |             |             |             |
|---|-------------|-------------|-------------|
| O | -0.48709000 | 0.57868400  | -0.96736100 |
| H | 0.03067200  | -0.59825700 | 1.28895000  |
| H | -1.19973200 | 0.47946600  | 1.41032200  |
| O | 2.04445700  | 0.46546200  | -1.69739300 |
| H | 2.14848700  | 0.73585700  | -2.61606400 |
| H | 1.06044800  | 0.46639000  | -1.50044100 |
| O | 3.00927600  | -1.86902300 | -0.56883400 |
| H | 2.77792300  | -1.08114200 | -1.10678200 |
| H | 3.96483200  | -1.96865400 | -0.63934700 |
| O | -0.13995500 | 2.66638500  | 0.64624000  |
| H | -0.34857600 | 1.98374500  | -0.04656000 |
| H | -0.50536600 | 3.50087400  | 0.33420600  |
| O | 2.54124800  | 1.86601200  | 0.76259200  |
| H | 2.57648700  | 1.52737200  | -0.15075900 |
| H | 1.67273500  | 2.31532200  | 0.80279300  |
| O | 1.82143900  | -0.70661000 | 1.71721700  |
| H | 2.12907800  | 0.20604000  | 1.53432100  |
| H | 2.28374700  | -1.24293700 | 1.04310000  |
| C | -0.76978700 | -1.81915200 | -1.04814600 |
| H | 0.25744400  | -2.04151100 | -0.75654500 |
| H | -1.43053400 | -2.60615800 | -0.68308700 |
| H | -0.82596900 | -1.80055100 | -2.13790800 |
| C | -1.77598300 | -1.44768900 | 1.90204700  |
| H | -1.43357300 | -2.45549200 | 1.67643100  |
| H | -1.63474800 | -1.25010300 | 2.96477200  |
| H | -2.82805100 | -1.34979800 | 1.64347000  |
| C | -3.16579100 | 0.95387800  | -0.67931700 |
| H | -2.70568400 | 1.60968400  | -1.41986200 |
| H | -4.22203000 | 0.81930300  | -0.90924100 |
| H | -3.07862700 | 1.41341900  | 0.31160200  |

**TS<sub>1</sub>**

|   |             |             |             |
|---|-------------|-------------|-------------|
| C | -1.13992700 | -0.40932900 | -0.47681300 |
| O | -2.56076100 | -0.28237900 | -0.78657400 |
| N | -0.94929300 | -0.53387900 | 1.00610900  |
| O | -0.43343800 | 0.66498800  | -0.91074000 |
| H | 0.70090400  | -0.65000900 | 1.41917700  |
| O | 2.00797200  | 0.49584200  | -1.59885400 |
| H | 2.17186100  | 0.85322600  | -2.47838600 |
| H | 0.98683800  | 0.50688700  | -1.42745600 |
| O | 2.94187200  | -1.87433300 | -0.46310000 |
| H | 2.74956100  | -1.11124500 | -1.04668200 |
| H | 3.89521300  | -2.00881500 | -0.50124800 |
| O | 0.04370700  | 2.66322400  | 0.59272700  |
| H | -0.27346800 | 1.91899900  | -0.04495500 |
| H | -0.10500000 | 3.51307100  | 0.16420300  |
| O | 2.34505200  | 1.60833200  | 0.75825500  |
| H | 2.43708000  | 1.33901200  | -0.20393500 |
| H | 1.48222100  | 2.17351400  | 0.76571700  |
| O | 1.68962200  | -0.59105200 | 1.66503000  |
| H | 2.08913400  | 0.66115700  | 1.23973700  |
| H | 2.16020000  | -1.21414700 | 1.06948800  |
| C | -0.74038500 | -1.71471900 | -1.17004300 |
| H | 0.28878800  | -1.97759100 | -0.92205400 |
| H | -1.39451300 | -2.54080700 | -0.88668200 |
| H | -0.81724700 | -1.56993700 | -2.24878000 |
| C | -1.76171100 | -1.54560600 | 1.70476000  |
| H | -1.42735100 | -2.54727000 | 1.43080300  |
| H | -1.61552400 | -1.42722700 | 2.78026600  |
| H | -2.83010100 | -1.46142500 | 1.48204500  |
| H | -1.15622000 | 0.38079800  | 1.40193700  |
| C | -3.17416700 | 0.94324600  | -0.41240900 |
| H | -3.18744900 | 1.08641000  | 0.67607100  |
| H | -2.67860400 | 1.80043400  | -0.87690400 |
| H | -4.20634500 | 0.89357600  | -0.76204400 |

**(T<sup>-</sup>...H<sub>3</sub>O<sup>+</sup>)<sub>1</sub>**

|   |             |             |             |
|---|-------------|-------------|-------------|
| C | -1.14126800 | -0.40860400 | -0.47656300 |
| O | -2.56191400 | -0.28128300 | -0.78720700 |
| N | -0.95041300 | -0.53445800 | 1.00537800  |

|   |             |             |             |
|---|-------------|-------------|-------------|
| O | -0.43490500 | 0.66668000  | -0.91021500 |
| H | 0.70943900  | -0.65389800 | 1.42378600  |
| O | 2.00577500  | 0.49819100  | -1.59721000 |
| H | 2.17001900  | 0.85838200  | -2.47555600 |
| H | 0.98411400  | 0.50799600  | -1.42609900 |
| O | 2.94393100  | -1.87506600 | -0.46732600 |
| H | 2.74928700  | -1.11094100 | -1.04854900 |
| H | 3.89707300  | -2.00951700 | -0.51012500 |
| O | 0.04600900  | 2.65792400  | 0.59506300  |
| H | -0.27342000 | 1.91383900  | -0.04401900 |
| H | -0.10290400 | 3.50905200  | 0.16909800  |
| O | 2.34495300  | 1.61142400  | 0.75443100  |
| H | 2.43371600  | 1.33755700  | -0.20790100 |
| H | 1.47697800  | 2.17369100  | 0.76321100  |
| O | 1.69566600  | -0.59516600 | 1.67022500  |
| H | 2.09768100  | 0.67251400  | 1.23852800  |
| H | 2.16562300  | -1.21654700 | 1.07303300  |
| C | -0.74105900 | -1.71275700 | -1.17162100 |
| H | 0.28829800  | -1.97518600 | -0.92395600 |
| H | -1.39459500 | -2.53959000 | -0.88907900 |
| H | -0.81823700 | -1.56680600 | -2.25018100 |
| C | -1.76386400 | -1.54567700 | 1.70326500  |
| H | -1.43134400 | -2.54758000 | 1.42785800  |
| H | -1.61651800 | -1.42897100 | 2.77880400  |
| H | -2.83246200 | -1.45986800 | 1.48182600  |
| H | -1.15515500 | 0.38005700  | 1.40257600  |
| C | -3.17592600 | 0.94309100  | -0.41000900 |
| H | -3.18947500 | 1.08341900  | 0.67882700  |
| H | -2.68064000 | 1.80170200  | -0.87222200 |
| H | -4.20800400 | 0.89394900  | -0.76001900 |

**TS<sub>2</sub>**

|   |             |             |             |
|---|-------------|-------------|-------------|
| C | -1.15336200 | -0.39929700 | -0.47695900 |
| O | -2.57096700 | -0.26501900 | -0.79366500 |
| N | -0.96195400 | -0.53737400 | 0.99864300  |
| O | -0.44167000 | 0.68001900  | -0.90752800 |
| H | 0.74460300  | -0.67688200 | 1.44256100  |
| O | 2.02804800  | 0.51419900  | -1.60497200 |
| H | 2.19434900  | 0.86870200  | -2.48535000 |
| H | 1.01606100  | 0.51950400  | -1.44568100 |
| O | 2.96554200  | -1.86996200 | -0.48346900 |
| H | 2.76850300  | -1.09837900 | -1.05307900 |
| H | 3.91851300  | -2.00297000 | -0.53333000 |
| O | 0.05346800  | 2.57633100  | 0.60866300  |
| H | -0.27351200 | 1.81477100  | -0.06212500 |
| H | -0.09156800 | 3.44009500  | 0.20696900  |
| O | 2.32779900  | 1.64926800  | 0.77069300  |
| H | 2.45245300  | 1.37450100  | -0.18222600 |
| H | 1.38589200  | 2.17344600  | 0.75474400  |
| O | 1.71920900  | -0.62327800 | 1.69494500  |
| H | 2.13106500  | 0.73667600  | 1.24853700  |
| H | 2.18844700  | -1.22673000 | 1.08168700  |
| C | -0.74965200 | -1.69281200 | -1.18785900 |
| H | 0.27960200  | -1.95570700 | -0.94030400 |
| H | -1.40239000 | -2.52398300 | -0.91679000 |
| H | -0.82490500 | -1.53366200 | -2.26465600 |
| C | -1.77856200 | -1.55260800 | 1.68562800  |
| H | -1.44989900 | -2.55297900 | 1.40002000  |
| H | -1.62954400 | -1.44769700 | 2.76211000  |
| H | -2.84766500 | -1.46190800 | 1.46714400  |
| H | -1.15827200 | 0.37283200  | 1.40916800  |
| C | -3.18653500 | 0.95256900  | -0.39694200 |
| H | -2.68923100 | 1.81928000  | -0.84188700 |
| H | -4.21688400 | 0.91023800  | -0.75264100 |
| H | -3.20470100 | 1.07290600  | 0.69407700  |

**T<sub>3</sub><sup>0</sup>**

|   |             |             |             |
|---|-------------|-------------|-------------|
| C | -1.24988800 | -0.52819000 | -0.43610400 |
| O | -2.63411900 | -0.40489200 | -0.77286700 |
| N | -0.98701500 | -0.36835600 | 0.99679900  |

|   |             |             |             |
|---|-------------|-------------|-------------|
| O | -0.48823800 | 0.44270600  | -1.13192700 |
| H | 0.85327000  | -0.52819800 | 1.52098900  |
| O | 2.22203300  | 0.29149200  | -1.76482900 |
| H | 2.40466400  | 0.44936200  | -2.69803600 |
| H | 1.24502900  | 0.27149500  | -1.67033700 |
| O | 3.12504300  | -1.88872600 | -0.26142300 |
| H | 2.94223900  | -1.17847100 | -0.90925700 |
| H | 4.08216100  | -1.99798700 | -0.25084300 |
| O | -0.15929100 | 2.65638800  | 0.42787900  |
| H | -0.47339900 | 1.29614700  | -0.63869900 |
| H | -0.33456300 | 3.56439500  | 0.15795600  |
| O | 2.46379400  | 1.92947800  | 0.63941900  |
| H | 2.60637300  | 1.57408300  | -0.25469600 |
| H | 0.81817000  | 2.57104300  | 0.54302600  |
| O | 1.79196100  | -0.49698000 | 1.82106700  |
| H | 2.30617900  | 1.11850700  | 1.17569900  |
| H | 2.27452500  | -1.09777700 | 1.22099300  |
| C | -0.84209900 | -1.90272000 | -0.94454600 |
| H | 0.19596000  | -2.10870400 | -0.68376100 |
| H | -1.47960100 | -2.67722400 | -0.51909400 |
| H | -0.95183600 | -1.92323000 | -2.02935200 |
| C | -1.78377000 | -1.21847300 | 1.89753500  |
| H | -1.48828600 | -2.26238000 | 1.78485900  |
| H | -1.56985900 | -0.92001100 | 2.92465500  |
| H | -2.86258300 | -1.14073100 | 1.72558300  |
| H | -1.11113000 | 0.60947800  | 1.25049500  |
| C | -3.25655700 | 0.85147900  | -0.50736000 |
| H | -2.79186800 | 1.65924700  | -1.08025200 |
| H | -4.29434600 | 0.74741000  | -0.82166400 |
| H | -3.23756900 | 1.10375000  | 0.55843600  |

**T<sup>-</sup>**

|   |             |             |             |
|---|-------------|-------------|-------------|
| C | 1.04523300  | -0.31628000 | -0.07590500 |
| O | 1.23625300  | -1.70048300 | 0.40036500  |
| N | 1.07048000  | 0.50567000  | 1.15186300  |
| O | -0.16260400 | -0.18460200 | -0.68407400 |
| H | 0.58754300  | 2.25993800  | 0.71352300  |
| H | 0.26705700  | 0.20485700  | 1.69941200  |
| O | -0.27525400 | 2.05046100  | -2.30614700 |
| H | -0.21240200 | 1.17909100  | -1.84456900 |
| O | -2.17803500 | 1.33699800  | 0.27030800  |
| H | -1.41418700 | 0.76864400  | -0.04124800 |
| H | -2.57411700 | 1.67766200  | -0.54018300 |
| O | -3.78524200 | -0.86687100 | 1.13737200  |
| H | -3.23790400 | -1.46141400 | 0.58764800  |
| H | -3.36292000 | -0.00396600 | 0.97331600  |
| O | -1.95049900 | -2.16450600 | -0.57586800 |
| H | -1.52280300 | -2.97596600 | -0.28434400 |
| H | -1.22329300 | -1.47428300 | -0.60494200 |
| O | 0.14910400  | 3.12109600  | 0.48853300  |
| H | -0.78717800 | 2.88206700  | 0.57551400  |
| H | -0.07303000 | 2.66848200  | -1.58606400 |
| C | 2.21818100  | 0.07489500  | -0.99189900 |
| H | 2.18658600  | 1.14852600  | -1.18194500 |
| H | 3.18704900  | -0.17777400 | -0.55550400 |
| H | 2.12333600  | -0.43983200 | -1.94857000 |
| C | 2.27332300  | 0.43806800  | 1.99676100  |
| H | 2.07646200  | 0.98302500  | 2.92263500  |
| H | 2.56736400  | -0.58670300 | 2.24799900  |
| H | 3.11109100  | 0.92868500  | 1.49784100  |
| C | 1.46064200  | -2.68861200 | -0.59523400 |
| H | 1.31914900  | -3.66089200 | -0.11817800 |
| H | 0.75360100  | -2.59906600 | -1.42707900 |
| H | 2.48116700  | -2.64594300 | -0.99457000 |

**TS<sub>3</sub>**

|   |             |             |             |
|---|-------------|-------------|-------------|
| C | -0.00643200 | -0.96280000 | 0.16308200  |
| O | -1.95918300 | -0.95431400 | -0.17968700 |
| N | 0.03627500  | -0.01977900 | 1.20813500  |
| O | 0.51722300  | -0.61840700 | -0.94613500 |

|   |             |             |             |
|---|-------------|-------------|-------------|
| H | 2.06171600  | 0.53069000  | 1.23882400  |
| H | -0.18302300 | 0.91094400  | 0.86201200  |
| O | 3.28542000  | -1.27834100 | -0.99334900 |
| H | 2.31985200  | -1.21350500 | -1.12565300 |
| O | 1.36337500  | 1.87675400  | -1.32021000 |
| H | 1.00879300  | 0.94280000  | -1.27737600 |
| H | 1.61637700  | 2.04006200  | -2.23506500 |
| O | -0.70498100 | 3.07911000  | 0.22133600  |
| H | -1.49974800 | 2.56162300  | -0.03463800 |
| H | -0.01392200 | 2.82290900  | -0.41459100 |
| O | -2.85760700 | 1.43577700  | -0.30801800 |
| H | -2.49588200 | 0.46866000  | -0.27625300 |
| H | -3.33124400 | 1.52422500  | -1.14104300 |
| O | 2.90458400  | 0.91636700  | 0.92961400  |
| H | 2.61759500  | 1.46345600  | 0.17731300  |
| H | 3.43210000  | -0.61213500 | -0.30041800 |
| C | 0.09614900  | -2.41659600 | 0.58090100  |
| H | 1.10705500  | -2.60310000 | 0.96025300  |
| H | -0.62451700 | -2.68831900 | 1.34924200  |
| H | -0.05995400 | -3.04606200 | -0.29391100 |
| C | -0.63451300 | -0.28136300 | 2.48525300  |
| H | -0.54098600 | 0.61053700  | 3.10675100  |
| H | -1.69505500 | -0.51657100 | 2.35806400  |
| H | -0.14852400 | -1.10418400 | 3.01145000  |
| C | -2.29290200 | -1.66974400 | -1.33395700 |
| H | -3.25493400 | -1.32721400 | -1.74987900 |
| H | -1.53682800 | -1.54721600 | -2.12851200 |
| H | -2.39725300 | -2.75169700 | -1.14359400 |

**AM...AL<sup>-</sup>**

|   |             |             |             |
|---|-------------|-------------|-------------|
| C | 2.51359600  | -0.04839000 | 0.18360200  |
| O | -3.73130400 | 1.28117300  | 1.19220500  |
| N | 2.35750300  | 1.27668400  | 0.07358500  |
| O | 1.57916600  | -0.83818100 | -0.07566800 |
| H | -1.92372600 | -3.86993500 | -1.13356600 |
| H | 1.43354900  | 1.63085500  | -0.20300100 |
| O | 1.08737600  | -3.58235100 | 0.49824300  |
| H | 1.35811500  | -2.66123800 | 0.32654700  |
| O | -0.98375400 | -0.89138700 | -1.30495300 |
| H | -0.10608400 | -0.73149200 | -0.91195200 |
| H | -1.51468400 | -0.03659900 | -1.17644400 |
| O | -0.09594200 | 2.65155700  | -0.57072800 |
| H | -0.97863500 | 2.16054800  | -0.75333700 |
| H | -0.02117900 | 3.32989100  | -1.24941200 |
| O | -2.27429000 | 1.34522700  | -0.97533000 |
| H | -3.16900400 | 1.32791400  | 0.35198600  |
| O | -1.62150600 | -3.33124700 | -0.39488200 |
| H | -1.48515900 | -2.41839700 | -0.76256600 |
| H | 0.15448900  | -3.61023100 | 0.21440900  |
| C | 3.86139800  | -0.56583000 | 0.63111900  |
| H | 4.64113400  | -0.27688900 | -0.07880200 |
| H | 4.13574400  | -0.15035200 | 1.60414700  |
| H | 3.82672300  | -1.65084700 | 0.69968800  |
| C | 3.38189900  | 2.27702700  | 0.35628600  |
| H | 2.96021800  | 3.25675100  | 0.13651800  |
| H | 3.68744800  | 2.26351700  | 1.40598700  |
| H | 4.26736700  | 2.13791300  | -0.26864100 |
| H | -3.65162000 | 2.14859200  | 1.60073100  |
| C | -2.98082400 | 1.75810700  | -2.11822800 |
| H | -3.23231700 | 2.83180800  | -2.08697200 |
| H | -2.40376500 | 1.59359600  | -3.04407200 |
| H | -3.93163100 | 1.21277800  | -2.23544000 |

**(T<sup>-</sup>...H<sub>3</sub>O<sup>+</sup>)<sub>2</sub>**

|   |             |             |             |
|---|-------------|-------------|-------------|
| C | 0.84380800  | -0.56935500 | 0.40149200  |
| O | 2.12154300  | 0.18884000  | 0.22824000  |
| N | 0.41869100  | -0.82685500 | -1.00070900 |
| O | -0.05364200 | 0.19727900  | 1.04390400  |
| H | -1.21301400 | -1.24073300 | -1.27543800 |
| O | -2.35429200 | -0.39562700 | 1.99429000  |

|   |             |             |             |
|---|-------------|-------------|-------------|
| H | -2.48197300 | 0.01742400  | 2.85525200  |
| H | -1.37746100 | -0.26341200 | 1.72966900  |
| O | 1.38997000  | 2.35331300  | -1.39330200 |
| H | 1.78379100  | 1.63380700  | -0.85246900 |
| H | 1.91125500  | 2.39806500  | -2.20175400 |
| O | -1.16483600 | 2.20421700  | -0.08330000 |
| H | -0.61622500 | 1.46607600  | 0.37262700  |
| O | -3.13892100 | 0.65193400  | -0.19085500 |
| H | -2.99039100 | 0.27824900  | 0.75683100  |
| H | -2.39636500 | 1.38126500  | -0.28605300 |
| O | -2.19185600 | -1.28767100 | -1.54562200 |
| H | -2.85545700 | -0.13088200 | -0.79880100 |
| H | -2.51278700 | -2.16960100 | -1.32522300 |
| C | 1.12679500  | -1.88788000 | 1.13042900  |
| H | 0.23861100  | -2.52170400 | 1.07970600  |
| H | 1.97271100  | -2.42977100 | 0.70432900  |
| H | 1.33552800  | -1.68133300 | 2.18039400  |
| C | 1.29991600  | -1.67603200 | -1.82632900 |
| H | 1.23162700  | -2.71468100 | -1.50053000 |
| H | 0.95411200  | -1.62767900 | -2.86073100 |
| H | 2.34724700  | -1.36146800 | -1.79079800 |
| H | 0.36406400  | 0.09031400  | -1.44114900 |
| C | 2.77066200  | 0.59047700  | 1.43333200  |
| H | 3.24805200  | -0.25874200 | 1.93327000  |
| H | 3.54347600  | 1.30865200  | 1.15427600  |
| H | 2.06532700  | 1.06793400  | 2.11902400  |
| H | -0.59377300 | 2.50465800  | -0.80787000 |

**TS<sub>4</sub>**

|   |             |             |             |
|---|-------------|-------------|-------------|
| C | -0.70049900 | 0.57767700  | 0.67583400  |
| O | -2.38585700 | -0.43491200 | -0.02693200 |
| N | -0.41763800 | 1.19879500  | -0.55855200 |
| O | 0.04610000  | -0.37553200 | 1.04442900  |
| H | 1.36932900  | 1.71072000  | -0.78924500 |
| O | 2.57397000  | -0.40665200 | 2.03895100  |
| H | 2.74634200  | -1.09099900 | 2.69580500  |
| H | 1.59752200  | -0.36536900 | 1.91414200  |
| O | -1.19705800 | -1.38423900 | -2.03927200 |
| H | -1.77114200 | -1.03440500 | -1.23443300 |
| H | -1.73819600 | -1.37113800 | -2.83401400 |
| O | 1.08452400  | -2.04357800 | -0.76360200 |
| H | 0.61873500  | -1.54263500 | -0.04028900 |
| O | 3.12853700  | -0.64140100 | -0.48334800 |
| H | 3.08540100  | -0.61087100 | 0.53024400  |
| H | 2.31460300  | -1.26147700 | -0.75449900 |
| O | 2.31456000  | 1.72688200  | -1.08709700 |
| H | 2.89768300  | 0.30894600  | -0.77891600 |
| H | 2.73685800  | 2.47687700  | -0.65181400 |
| C | -1.38529600 | 1.41108500  | 1.73090100  |
| H | -0.66439600 | 2.13724100  | 2.12455100  |
| H | -2.25303300 | 1.94727600  | 1.35396500  |
| H | -1.68944400 | 0.75745800  | 2.54674800  |
| C | -1.32255300 | 2.23963300  | -1.07248300 |
| H | -1.26285700 | 3.13341100  | -0.45110900 |
| H | -0.99330600 | 2.50757400  | -2.07719100 |
| H | -2.35772900 | 1.89312500  | -1.11404900 |
| H | -0.28618600 | 0.47226600  | -1.26115400 |
| C | -2.83687000 | -1.39257100 | 0.88478700  |
| H | -3.50773600 | -0.95929000 | 1.64617800  |
| H | -3.40243600 | -2.19573700 | 0.38333800  |
| H | -2.00340400 | -1.87807700 | 1.42343200  |
| H | 0.43995700  | -1.96594800 | -1.50109900 |

**(AM...AL)<sub>1</sub>**

|   |             |             |             |
|---|-------------|-------------|-------------|
| C | 0.11113100  | 2.30847700  | -0.13158600 |
| O | 4.20427600  | -1.74407900 | -0.16822600 |
| N | 1.18234300  | 1.89627600  | 0.55711100  |
| O | -0.63560200 | 1.49139800  | -0.71872500 |
| H | -4.15660200 | -2.42232800 | 2.44517300  |
| O | -3.36589400 | 1.10792300  | -0.90918900 |

|   |             |             |             |
|---|-------------|-------------|-------------|
| H | -3.75785800 | 1.50862400  | -1.69254600 |
| H | -2.42911400 | 1.39654700  | -0.89920700 |
| O | 1.64108800  | -1.10956100 | 0.80848800  |
| H | 3.30957500  | -1.54761400 | 0.16727500  |
| H | 1.44348900  | -1.46070200 | 1.68419500  |
| O | -0.37414400 | -1.27469700 | -0.95663100 |
| H | -0.44779100 | -0.29758800 | -0.95233400 |
| O | -3.11460800 | -1.69219100 | -0.71172000 |
| H | -3.34414400 | -0.74317000 | -0.76407100 |
| H | -1.29453600 | -1.58209800 | -0.81269400 |
| O | -4.32242800 | -2.83231300 | 1.58812100  |
| H | -3.54759700 | -2.03996200 | 0.08932500  |
| H | -5.27361700 | -2.98980600 | 1.56417800  |
| C | -0.16936400 | 3.78947900  | -0.18713300 |
| H | -0.28809700 | 4.20292300  | 0.81752600  |
| H | 0.66002300  | 4.31947300  | -0.66302900 |
| H | -1.07815000 | 3.96173000  | -0.75923000 |
| C | 2.12013000  | 2.75806400  | 1.27319300  |
| H | 1.63043700  | 3.29968300  | 2.08613000  |
| H | 2.89640200  | 2.12589600  | 1.70055800  |
| H | 2.59420000  | 3.47804100  | 0.60288200  |
| H | 1.33745400  | 0.88933600  | 0.61525800  |
| C | 4.21164500  | -3.07380500 | -0.67989900 |
| H | 5.21752400  | -3.28042500 | -1.04941100 |
| H | 3.97003700  | -3.81154600 | 0.09485300  |
| H | 3.50659000  | -3.19613700 | -1.51095500 |
| H | 0.87262500  | -1.34992700 | 0.23193600  |

**T<sub>3</sub><sup>±</sup>**

|   |             |             |             |
|---|-------------|-------------|-------------|
| C | 1.27569600  | 0.13510000  | -0.42057400 |
| O | 2.61778500  | -0.32261700 | -0.15944400 |
| N | 0.89197500  | 0.66553100  | 1.04132800  |
| O | 0.43749700  | -0.82178900 | -0.73500100 |
| H | -0.00410400 | 1.18170600  | 0.95908100  |
| O | -0.02582700 | -2.22143700 | 1.55444900  |
| H | 0.18513100  | -1.90324400 | 0.64493000  |
| H | -0.99751400 | -2.28712100 | 1.54281300  |
| O | -2.84627000 | -2.15048900 | 0.94624400  |
| H | -3.34016700 | -2.96010700 | 0.77765900  |
| H | -2.69126200 | -1.74657400 | 0.06679700  |
| O | -2.06680500 | -0.82340900 | -1.40410400 |
| H | -1.07544900 | -0.75710300 | -1.21693500 |
| H | -2.16111400 | -1.26361800 | -2.25627000 |
| O | -3.23159600 | 1.61397300  | -0.97141100 |
| H | -3.23048400 | 2.15977400  | -1.76534500 |
| H | -2.85801800 | 0.74346200  | -1.23999500 |
| O | -1.49938400 | 2.24824300  | 1.06365600  |
| H | -2.14700500 | 2.12138400  | 0.33345100  |
| H | -1.39444200 | 3.20031300  | 1.16605000  |
| C | 1.28584900  | 1.34172500  | -1.36413200 |
| H | 0.28346300  | 1.76780200  | -1.43651600 |
| H | 1.98603400  | 2.11523100  | -1.04412600 |
| H | 1.58082300  | 0.99924000  | -2.35727200 |
| C | 1.86285500  | 1.50918300  | 1.78849300  |
| H | 2.02805900  | 2.43737700  | 1.24542200  |
| H | 1.44499700  | 1.73554700  | 2.76939400  |
| H | 2.79837300  | 0.96846600  | 1.89348700  |
| H | 0.68601600  | -0.19409400 | 1.56633700  |
| C | 3.17198200  | -1.15805400 | -1.17378100 |
| H | 2.54403800  | -2.03361800 | -1.35237200 |
| H | 3.31001700  | -0.61442100 | -2.11517700 |
| H | 4.14729700  | -1.47663100 | -0.80584900 |

**TS<sub>5</sub>**

|   |             |             |             |
|---|-------------|-------------|-------------|
| C | -1.30125600 | 0.12833400  | 0.35822600  |
| O | -2.63449100 | -0.28456400 | 0.13396400  |
| N | -0.83638100 | 0.54904800  | -1.02484400 |
| O | -0.49461900 | -0.93738600 | 0.73975500  |
| H | 0.03098500  | 1.09944500  | -0.91588200 |
| O | -0.20287800 | -1.82177800 | -1.55295300 |



|   |             |             |             |
|---|-------------|-------------|-------------|
| H | -0.35513300 | -1.51696000 | -0.14550100 |
| H | 0.74852800  | -1.94917500 | -1.68037900 |
| O | 2.83781400  | -2.06298400 | -1.11244800 |
| H | 3.27368900  | -2.91984300 | -1.05386400 |
| H | 2.70401500  | -1.77768800 | -0.18916900 |
| O | 2.13867100  | -0.98068500 | 1.44704600  |
| H | 1.16216400  | -0.90958200 | 1.32241200  |
| H | 2.27730300  | -1.47172000 | 2.26516800  |
| O | 3.31415100  | 1.48599400  | 1.00969700  |
| H | 3.35572100  | 2.02027000  | 1.81042600  |
| H | 2.94694600  | 0.61851200  | 1.28343900  |
| O | 1.55243900  | 2.21067600  | -0.98900800 |
| H | 2.20726500  | 2.04919200  | -0.27419900 |
| H | 1.43914700  | 3.16618200  | -1.03390500 |
| C | -1.18856500 | 1.26661600  | 1.36373500  |
| H | -0.16176100 | 1.63234400  | 1.40044800  |
| H | -1.85250200 | 2.08934900  | 1.09390100  |
| H | -1.45907700 | 0.90928700  | 2.35763700  |
| C | -1.77945100 | 1.32759100  | -1.86321100 |
| H | -2.10143900 | 2.23451400  | -1.35049700 |
| H | -1.25767300 | 1.60254200  | -2.77981100 |
| H | -2.64479000 | 0.71720200  | -2.10418500 |
| H | -0.52498600 | -0.47197600 | -1.49623300 |
| C | -3.31467100 | -0.85768100 | 1.25450100  |
| H | -2.72758400 | -1.66333600 | 1.70035700  |
| H | -3.54409500 | -0.10360100 | 2.01302400  |
| H | -4.24709400 | -1.26163400 | 0.86279600  |

**T<sub>1</sub><sup>o</sup>**

|   |             |             |             |
|---|-------------|-------------|-------------|
| C | -1.36190700 | -0.20960100 | -0.28501600 |
| O | -2.67081500 | 0.29492000  | -0.11711200 |
| N | -0.86627900 | -0.41735500 | 1.07659700  |
| O | -0.53645000 | 0.78038200  | -0.90078200 |
| H | 0.04496000  | -0.87616900 | 1.01313000  |
| O | -0.07519100 | 2.32209400  | 1.43409500  |
| H | -0.47465400 | 1.52662400  | -0.26651900 |
| H | 0.89752200  | 2.32652700  | 1.34689700  |
| O | 2.69864300  | 2.19178500  | 0.79655500  |
| H | 3.21167900  | 2.99773500  | 0.67235500  |
| H | 2.64600900  | 1.77123500  | -0.08376300 |
| O | 2.13566100  | 0.76016500  | -1.59324200 |
| H | 1.16333100  | 0.67939200  | -1.46707700 |
| H | 2.26613500  | 1.16536400  | -2.45868100 |
| O | 3.40987200  | -1.60610000 | -0.88735600 |
| H | 3.43569400  | -2.24415200 | -1.60875100 |
| H | 3.00531700  | -0.79538800 | -1.25996100 |
| O | 1.73124100  | -2.06821700 | 1.28691900  |
| H | 2.34775500  | -2.00348500 | 0.52762400  |
| H | 1.58237700  | -3.01056600 | 1.41824900  |
| C | -1.29968200 | -1.44766600 | -1.17964900 |
| H | -0.28117200 | -1.83885600 | -1.18522900 |
| H | -1.97079400 | -2.22082000 | -0.80292700 |
| H | -1.58046200 | -1.20913300 | -2.20613100 |
| C | -1.72057400 | -1.21889400 | 1.96757500  |
| H | -1.97603200 | -2.20591500 | 1.56049600  |
| H | -1.18046700 | -1.36869800 | 2.90400000  |
| H | -2.64385800 | -0.68438500 | 2.18462000  |
| H | -0.31898400 | 1.39062000  | 1.63122800  |
| C | -3.41516200 | 0.57017600  | -1.30574100 |
| H | -2.83951400 | 1.18666800  | -2.00074400 |
| H | -3.73158800 | -0.35007300 | -1.80518500 |
| H | -4.29904500 | 1.12064400  | -0.98543100 |

**T<sub>2</sub><sup>o</sup>**

|   |             |             |             |
|---|-------------|-------------|-------------|
| C | 1.44396900  | -0.48834600 | 0.31094100  |
| O | 1.64900900  | 0.96783400  | 0.36028500  |
| N | 0.74758000  | -0.93938600 | -0.83110600 |
| O | 0.56555700  | -0.68525800 | 1.42151200  |
| H | -0.07367000 | -0.37715700 | -1.05353400 |
| O | -1.61515100 | -2.42123900 | 1.61566200  |

|   |             |             |             |
|---|-------------|-------------|-------------|
| H | -1.31049200 | -3.33507200 | 1.59588400  |
| H | -0.81153900 | -1.87097200 | 1.52303900  |
| O | -3.41270900 | -1.64978800 | -0.33386900 |
| H | -2.82553700 | -1.96111300 | 0.38975500  |
| H | -4.25246900 | -1.43110600 | 0.08409600  |
| O | -0.24459700 | 2.69313400  | 1.46209800  |
| H | 0.94628000  | -0.26157800 | 2.20199800  |
| H | 0.24552700  | 3.48622900  | 1.70512900  |
| O | -2.27230500 | 2.85689900  | -0.39472300 |
| H | -3.10965500 | 3.02790000  | 0.04953300  |
| H | -1.58737200 | 2.86848000  | 0.30969300  |
| O | -1.90555000 | 0.34878400  | -1.65950100 |
| H | -2.09076600 | 1.20878500  | -1.23539400 |
| H | -2.49146500 | -0.29415200 | -1.21549800 |
| C | 2.77132600  | -1.19913500 | 0.55167300  |
| H | 2.60741100  | -2.27546500 | 0.61725400  |
| H | 3.49262200  | -1.00592600 | -0.24282800 |
| H | 3.19470800  | -0.84769000 | 1.49373100  |
| C | 1.43378200  | -1.47744800 | -2.00219100 |
| H | 1.95836000  | -2.40425800 | -1.75934400 |
| H | 0.67332900  | -1.71990300 | -2.74587200 |
| H | 2.15155000  | -0.79179000 | -2.47040700 |
| H | 0.42029900  | 2.06447200  | 1.10833900  |
| C | 2.34352900  | 1.56380900  | -0.73928500 |
| H | 2.39579300  | 2.63142400  | -0.52729700 |
| H | 3.36102200  | 1.17442000  | -0.83162200 |
| H | 1.80333800  | 1.41396800  | -1.67745600 |

**TS<sub>6</sub>**

|   |             |             |             |
|---|-------------|-------------|-------------|
| C | 0.93732300  | -0.91877800 | 0.47805000  |
| O | 2.28156800  | 0.58507400  | 0.10123300  |
| N | 0.48123100  | -1.34101200 | -0.69023300 |
| O | 0.01866800  | -0.20119200 | 1.17603100  |
| H | -0.28266400 | -0.78632500 | -1.10005600 |
| O | -2.64066500 | -0.94301900 | 1.80881300  |
| H | -2.65445600 | -1.80762300 | 2.23398100  |
| H | -1.70155900 | -0.74776300 | 1.63059700  |
| O | -3.91530200 | -0.49776500 | -0.59863500 |
| H | -3.56970700 | -0.68588200 | 0.30065900  |
| H | -4.67877900 | 0.07629200  | -0.47466300 |
| O | 1.01587200  | 2.18787500  | 1.40216300  |
| H | 0.38390300  | 0.65468900  | 1.53567800  |
| H | 1.48580400  | 2.66375000  | 2.09429300  |
| O | -0.82361200 | 2.91134900  | -0.53145700 |
| H | -1.52690100 | 3.47602300  | -0.19366900 |
| H | -0.20126000 | 2.77904200  | 0.21786900  |
| O | -1.54494400 | 0.44556700  | -1.79337200 |
| H | -1.33554000 | 1.29906200  | -1.36493000 |
| H | -2.41707300 | 0.18288200  | -1.43783800 |
| C | 1.92764300  | -1.72246600 | 1.26330700  |
| H | 1.40949100  | -2.58901600 | 1.68955600  |
| H | 2.75093200  | -2.06922500 | 0.64228300  |
| H | 2.32459200  | -1.11852000 | 2.07637800  |
| C | 1.12642800  | -2.35880500 | -1.51446700 |
| H | 1.15748000  | -3.31944200 | -0.99687900 |
| H | 0.53921000  | -2.47525100 | -2.42364800 |
| H | 2.14325400  | -2.07023000 | -1.79105200 |
| H | 1.70923900  | 1.58641600  | 0.81094500  |
| C | 2.43230700  | 0.90571500  | -1.25868800 |
| H | 2.49222000  | 1.99346900  | -1.40600300 |
| H | 3.34553100  | 0.45885900  | -1.67674900 |
| H | 1.58277800  | 0.54875800  | -1.86253200 |

**(AM...AL)<sub>2</sub>**

|   |             |             |             |
|---|-------------|-------------|-------------|
| C | 0.52605100  | -1.75912500 | -0.33787500 |
| O | -4.07709300 | -0.04106800 | -0.72038700 |
| N | 0.88554100  | -1.48330900 | 0.91499100  |
| O | 0.43238100  | -0.85030700 | -1.20528500 |
| H | 1.07842200  | -0.49970900 | 1.14700800  |
| O | 2.53152600  | 0.71219900  | -2.11585400 |

|   |             |             |             |
|---|-------------|-------------|-------------|
| H | 3.09169200  | 0.16004600  | -2.67220100 |
| H | 1.80352500  | 0.13154400  | -1.80778000 |
| O | 3.56825300  | 1.97824200  | 0.09674400  |
| H | 3.27141000  | 1.56978000  | -0.74649600 |
| H | 3.73398700  | 2.90607000  | -0.10181800 |
| O | -1.49997600 | 1.09272200  | -1.19051200 |
| H | -0.79852400 | 0.40184700  | -1.22099400 |
| H | -1.46386600 | 1.54338400  | -2.04268400 |
| O | -0.86378300 | 2.61415100  | 1.07439900  |
| H | -0.83798400 | 3.55652300  | 0.87627300  |
| H | -1.13328100 | 2.17249700  | 0.24259600  |
| O | 1.46857600  | 1.21558200  | 1.80185600  |
| H | 0.69790700  | 1.77686200  | 1.58496300  |
| H | 2.20768100  | 1.56307300  | 1.26339700  |
| C | 0.23203100  | -3.19320700 | -0.70027800 |
| H | 1.10804500  | -3.82422000 | -0.52764800 |
| H | -0.58030500 | -3.58937700 | -0.08506800 |
| H | -0.04996800 | -3.24716200 | -1.74912500 |
| C | 1.02266900  | -2.46058000 | 1.99194000  |
| H | 1.76873100  | -3.22136200 | 1.75121500  |
| H | 1.34836000  | -1.93026300 | 2.88506800  |
| H | 0.07279700  | -2.95423200 | 2.21064500  |
| H | -3.19835700 | 0.34702300  | -0.87887900 |
| C | -4.56076200 | 0.43079500  | 0.53491000  |
| H | -4.67369000 | 1.52137800  | 0.54532300  |
| H | -5.54146900 | -0.01854500 | 0.69952300  |
| H | -3.90290800 | 0.13855600  | 1.36188100  |

**T<sub>4</sub><sup>±</sup>**

|   |             |             |             |
|---|-------------|-------------|-------------|
| C | -0.73347200 | -0.91860800 | -0.49386500 |
| O | -1.99759500 | -0.17722700 | -0.26220800 |
| N | -0.04215500 | -0.68532200 | 0.91525800  |
| O | 0.01746900  | -0.42318400 | -1.42564800 |
| H | 0.90415400  | -1.10283100 | 0.83754200  |
| H | 0.11861800  | 0.33632800  | 1.00014200  |
| O | 1.52811600  | 1.66928600  | -1.36296800 |
| H | 1.44157000  | 2.18142100  | -2.17413700 |
| H | 0.88798700  | 0.88338600  | -1.42766300 |
| O | -2.24820000 | 2.34815700  | 0.97555800  |
| H | -2.74542300 | 2.93751500  | 0.39815400  |
| H | -2.22180300 | 1.48160600  | 0.51968300  |
| O | 0.52306400  | 2.17596200  | 1.19774100  |
| H | -0.39729100 | 2.49504600  | 1.13063800  |
| H | 0.90123700  | 2.26460400  | 0.30181900  |
| O | 3.85789500  | 0.42518800  | -0.61443200 |
| H | 3.09225800  | 0.95799400  | -0.92987000 |
| H | 4.44323200  | 1.04190500  | -0.16155700 |
| O | 2.69589300  | -1.57873900 | 0.88212200  |
| H | 3.18738100  | -0.90823900 | 0.35558600  |
| H | 2.97299500  | -2.43709300 | 0.54381500  |
| C | -1.03283600 | -2.41756700 | -0.62817800 |
| H | -0.10292900 | -2.98233000 | -0.53221500 |
| H | -1.75211400 | -2.77840300 | 0.10871000  |
| H | -1.43025900 | -2.60305300 | -1.62628800 |
| C | -0.70947700 | -1.17960700 | 2.14950200  |
| H | -0.73077800 | -2.26694900 | 2.14520300  |
| H | -0.14223800 | -0.83445100 | 3.01373700  |
| H | -1.72248600 | -0.78765400 | 2.19119200  |
| C | -2.87251900 | -0.17147900 | -1.39355000 |
| H | -3.68414200 | 0.51970600  | -1.16435000 |
| H | -2.34838900 | 0.16936900  | -2.28984700 |
| H | -3.29981100 | -1.16260000 | -1.57187000 |

**TS<sub>7</sub>**

|   |             |             |             |
|---|-------------|-------------|-------------|
| C | -0.48623900 | 1.01414800  | 0.63672300  |
| O | -2.38950000 | -0.03705800 | 0.02773200  |
| N | 0.08198900  | 0.85641200  | -0.74844700 |
| O | -0.00439500 | 0.29583300  | 1.48975800  |
| H | 1.07165600  | 1.20874500  | -0.69163300 |
| H | 0.18044400  | -0.18227900 | -0.94426700 |

|   |             |             |             |
|---|-------------|-------------|-------------|
| O | 1.72646000  | -1.89115700 | 1.24959300  |
| H | 1.71855400  | -2.50348000 | 1.99412000  |
| H | 1.09744700  | -1.17370200 | 1.46799600  |
| O | -2.15710000 | -2.12623000 | -1.17215900 |
| H | -2.53699900 | -2.86077800 | -0.68075400 |
| H | -2.29184000 | -1.07336800 | -0.53243000 |
| O | 0.39386700  | -1.81040900 | -1.32993300 |
| H | -0.57918400 | -2.08802700 | -1.26239600 |
| H | 0.84520500  | -2.16919400 | -0.54972500 |
| O | 4.01491700  | -0.54317900 | 0.42569700  |
| H | 3.28473300  | -1.11762400 | 0.73934800  |
| H | 4.55758700  | -1.09221700 | -0.15098500 |
| O | 2.76224900  | 1.62711600  | -0.68089200 |
| H | 3.28782200  | 0.88970400  | -0.29161100 |
| H | 3.04016700  | 2.42872900  | -0.22398600 |
| C | -1.18605300 | 2.30764200  | 0.92454700  |
| H | -0.42907100 | 3.10024900  | 0.95717600  |
| H | -1.92913100 | 2.56144300  | 0.17396800  |
| H | -1.65372600 | 2.24015600  | 1.90465400  |
| C | -0.60844000 | 1.51806100  | -1.89273100 |
| H | -0.53850100 | 2.59897200  | -1.79397500 |
| H | -0.10366300 | 1.20653900  | -2.80579600 |
| H | -1.64651200 | 1.19944500  | -1.90538200 |
| C | -3.15280800 | -0.23909100 | 1.19557200  |
| H | -3.89589000 | -1.03535400 | 1.04794700  |
| H | -2.52550300 | -0.52904700 | 2.05368400  |
| H | -3.69826900 | 0.67231400  | 1.47014200  |

(AM...AL)<sub>3</sub>

|   |             |             |             |
|---|-------------|-------------|-------------|
| C | 3.14216200  | 1.38533400  | 0.20759800  |
| O | -6.88827500 | -0.12489300 | -0.24656700 |
| N | 3.86840800  | 0.41550200  | -0.36632900 |
| O | 2.03722500  | 1.15996200  | 0.74295100  |
| H | 3.50410100  | -0.53885800 | -0.34387900 |
| H | -1.92956900 | 0.60485400  | -0.94956300 |
| O | 0.13972600  | -0.66990800 | 1.16512000  |
| H | -0.02652500 | -0.62339500 | 2.11422500  |
| H | 0.89512600  | -0.05000100 | 0.98959500  |
| O | -4.48991700 | 0.30321200  | 1.11805200  |
| H | -4.40585300 | 1.10704900  | 1.64179000  |
| H | -6.04572500 | 0.04481400  | 0.21739900  |
| O | -2.15923700 | -0.06420100 | -0.29556700 |
| H | -3.64177400 | 0.21036700  | 0.63000900  |
| H | -1.33672600 | -0.24046700 | 0.20901500  |
| O | 0.83099500  | -3.19422800 | 0.25636800  |
| H | 0.50267000  | -2.33272600 | 0.59256700  |
| H | 0.17634200  | -3.49731000 | -0.38221200 |
| O | 3.33867700  | -2.46458900 | -0.62447500 |
| H | 2.46437500  | -2.80973800 | -0.34001900 |
| H | 3.99197300  | -3.03579700 | -0.20659100 |
| C | 3.70637900  | 2.78729700  | 0.18815000  |
| H | 4.68264500  | 2.82246400  | 0.67856500  |
| H | 3.84440100  | 3.13583000  | -0.83886700 |
| H | 3.01919500  | 3.45421900  | 0.70372500  |
| C | 5.16787500  | 0.59431200  | -1.00829400 |
| H | 5.92705600  | 0.93788100  | -0.30088800 |
| H | 5.47924100  | -0.37166200 | -1.40254400 |
| H | 5.11416500  | 1.30221900  | -1.83862300 |
| C | -7.07428300 | 0.89003400  | -1.22811600 |
| H | -7.13565100 | 1.88855500  | -0.77821800 |
| H | -6.26893400 | 0.89179900  | -1.97275200 |
| H | -8.01573400 | 0.68669200  | -1.74151800 |

**Table S2.** Cartesian coordinates of stationary points for the reaction of methyamine with phenylacetate in water. Optimized geometries at the B3LYP/6-311+G(d,p) level.

RC

|   |             |            |             |
|---|-------------|------------|-------------|
| C | -1.88563700 | 1.73840000 | -0.82347000 |
|---|-------------|------------|-------------|

|   |             |             |             |
|---|-------------|-------------|-------------|
| O | -2.94965100 | 0.98962400  | -1.16197400 |
| N | 4.69415100  | -2.21890900 | -1.40505100 |
| O | -1.04338400 | 1.36936000  | -0.02264600 |
| H | 4.55606800  | -1.44067300 | -0.75957900 |
| H | 3.80124700  | -2.69719200 | -1.47830200 |
| O | 1.18819900  | 2.76893700  | 1.00839600  |
| H | 0.91780200  | 3.58920000  | 1.43747100  |
| H | 0.37643400  | 2.38211700  | 0.62407800  |
| O | 3.45236000  | 2.65988400  | -0.67000400 |
| H | 2.65798700  | 2.81759700  | -0.12252900 |
| H | 3.96088400  | 3.47719800  | -0.63288200 |
| O | -0.08519200 | -0.92747800 | 1.47298300  |
| H | -0.56803000 | -0.25925900 | 0.95683800  |
| H | -0.73991000 | -1.32385000 | 2.05848500  |
| O | 2.21926900  | 0.43481800  | 2.36355100  |
| H | 1.92442500  | 1.31599200  | 2.07332300  |
| H | 1.45889100  | -0.13920100 | 2.14623700  |
| O | 4.38506800  | 0.22593200  | 0.53117400  |
| H | 3.67899500  | 0.18169000  | 1.20586000  |
| H | 4.19192500  | 1.05524800  | 0.05682200  |
| C | -1.89035800 | 3.05941000  | -1.52783100 |
| H | -0.89981100 | 3.50735900  | -1.49213400 |
| H | -2.22153400 | 2.94261900  | -2.55943300 |
| H | -2.59924800 | 3.72010800  | -1.02025100 |
| C | 5.71222900  | -3.13945300 | -0.88033400 |
| H | 6.66928300  | -2.61676000 | -0.80452700 |
| H | 5.48098200  | -3.55965800 | 0.10927900  |
| H | 5.85003800  | -3.97361300 | -1.57340900 |
| C | -3.14486400 | -0.26682000 | -0.55073000 |
| C | -3.76578400 | -0.32972200 | 0.69002400  |
| C | -2.78974800 | -1.40691500 | -1.25848500 |
| C | -4.02682900 | -1.58334500 | 1.24295600  |
| H | -4.04212000 | 0.58080800  | 1.20741800  |
| C | -3.05901000 | -2.65443900 | -0.69538800 |
| H | -2.31669300 | -1.31579400 | -2.22851300 |
| C | -3.67469300 | -2.74406800 | 0.55307100  |
| H | -4.51059400 | -1.64949100 | 2.21029600  |
| H | -2.78792600 | -3.55367100 | -1.23572800 |
| H | -3.88332700 | -3.71531200 | 0.98582100  |

**TS (RC-T<sub>1</sub><sup>‡</sup>)**

|   |             |             |             |
|---|-------------|-------------|-------------|
| C | -0.10000400 | 0.84643700  | -0.80375700 |
| O | 1.21882000  | 1.33488900  | -0.84346900 |
| N | -0.59037200 | 1.43693000  | 0.99241800  |
| O | -0.29153700 | -0.39559500 | -0.76296300 |
| H | -1.54742500 | 1.09469800  | 1.15598700  |
| H | 0.02558200  | 0.86627100  | 1.56792200  |
| O | -2.59666000 | -1.65559000 | -1.40954600 |
| H | -2.49079400 | -2.20084600 | -2.19699000 |
| H | -1.73779000 | -1.18108600 | -1.27301600 |
| O | -4.55111700 | 0.28212000  | -0.99533100 |
| H | -3.96934100 | -0.45150700 | -1.28371500 |
| H | -5.45393900 | -0.02880400 | -1.12274000 |
| O | 0.12166800  | -2.01610400 | 1.41192900  |
| H | 0.14447700  | -1.48153000 | 0.58787100  |
| H | 0.79164600  | -2.70010500 | 1.30725400  |
| O | -2.66509800 | -2.38355800 | 1.37823000  |
| H | -2.76452200 | -2.36363600 | 0.40973100  |
| H | -1.69535000 | -2.38646100 | 1.50660000  |
| O | -3.33582900 | 0.38511400  | 1.57366300  |
| H | -3.14525100 | -0.57223500 | 1.64410000  |
| H | -3.86585800 | 0.45562200  | 0.75683100  |
| C | -0.97493600 | 1.74921900  | -1.64237400 |
| H | -2.02557100 | 1.57121200  | -1.41495600 |
| H | -0.73467900 | 2.80054800  | -1.49117000 |
| H | -0.79700000 | 1.50128600  | -2.69261200 |
| C | -0.46539600 | 2.85967400  | 1.34984800  |
| H | -1.22698900 | 3.43268000  | 0.82136700  |
| H | -0.59325900 | 3.01762100  | 2.42412300  |
| H | 0.51880200  | 3.22414700  | 1.05327700  |

|   |            |             |             |
|---|------------|-------------|-------------|
| C | 2.27284100 | 0.50285600  | -0.47686800 |
| C | 2.67250000 | -0.54574600 | -1.30472800 |
| C | 2.98217200 | 0.80299700  | 0.68387000  |
| C | 3.78409400 | -1.30870100 | -0.95190800 |
| H | 2.11996300 | -0.75445300 | -2.21162100 |
| C | 4.09685200 | 0.03632600  | 1.02667300  |
| H | 2.67238300 | 1.63651700  | 1.30288700  |
| C | 4.49767800 | -1.02281000 | 0.21361700  |
| H | 4.09647400 | -2.12475700 | -1.59366000 |
| H | 4.65077500 | 0.27194000  | 1.92818800  |
| H | 5.36348800 | -1.61735800 | 0.48108300  |

**T<sub>1</sub><sup>±</sup>**

|   |             |             |             |
|---|-------------|-------------|-------------|
| C | 0.00905400  | 0.45456900  | -0.23799900 |
| O | 1.30120700  | 0.92999400  | 0.27648200  |
| N | -0.87531000 | 1.67732100  | 0.27018900  |
| O | -0.43525200 | -0.62553100 | 0.34001400  |
| H | -1.87169100 | 1.44405000  | 0.05285400  |
| H | -0.79310100 | 1.62836100  | 1.28846600  |
| O | -2.38335300 | -2.19658900 | -0.51384100 |
| H | -2.07122400 | -3.09763600 | -0.65078600 |
| H | -1.58580700 | -1.64426700 | -0.26835000 |
| O | -3.75448800 | -0.63200000 | -2.33433300 |
| H | -3.31434400 | -1.33110100 | -1.80447900 |
| H | -4.58487600 | -1.01172400 | -2.64129700 |
| O | -1.35560700 | -0.35399300 | 2.82106900  |
| H | -0.88968700 | -0.53725600 | 1.96115400  |
| H | -0.86412900 | -0.81552500 | 3.50870700  |
| O | -3.83179600 | -1.00042000 | 1.66933000  |
| H | -3.48002000 | -1.61261100 | 0.99753100  |
| H | -3.05922600 | -0.81992000 | 2.24229700  |
| O | -3.62816500 | 1.14913200  | -0.16029500 |
| H | -3.81904000 | 0.48883200  | 0.53954900  |
| H | -3.77724200 | 0.65585500  | -0.99213100 |
| C | 0.01041600  | 0.45900000  | -1.76669500 |
| H | -1.00854400 | 0.32927600  | -2.13557900 |
| H | 0.43231300  | 1.37522200  | -2.18082800 |
| H | 0.60604700  | -0.38448700 | -2.11529100 |
| C | -0.56523600 | 3.05804000  | -0.19209600 |
| H | -0.77802100 | 3.13737100  | -1.25540600 |
| H | -1.19820000 | 3.75637400  | 0.35428500  |
| H | 0.48227700  | 3.27233800  | 0.00073500  |
| C | 2.45511000  | 0.21102700  | 0.08803200  |
| C | 2.50931000  | -1.16166500 | -0.18066800 |
| C | 3.64430900  | 0.93959100  | 0.22042900  |
| C | 3.75111200  | -1.78280900 | -0.32882300 |
| H | 1.59589500  | -1.73310600 | -0.25630400 |
| C | 4.87439600  | 0.30403300  | 0.08143500  |
| H | 3.58661100  | 2.00117900  | 0.43115600  |
| C | 4.93720300  | -1.06273300 | -0.19860900 |
| H | 3.78339700  | -2.84613700 | -0.54043600 |
| H | 5.78628800  | 0.88143100  | 0.18675300  |
| H | 5.89508900  | -1.55683400 | -0.31136900 |

**T<sub>2</sub><sup>±</sup>**

|   |             |             |             |
|---|-------------|-------------|-------------|
| C | 0.18854600  | 0.92063300  | 0.62127000  |
| O | -1.18632500 | 1.39425800  | 0.79041700  |
| N | 0.51860000  | 1.32669400  | -0.92184000 |
| O | 0.36037200  | -0.36017400 | 0.71478800  |
| H | 1.47078900  | 0.95408400  | -1.13322500 |
| O | 2.62688500  | -1.51668000 | 1.45360300  |
| H | 2.53165700  | -1.98062100 | 2.29244800  |
| H | 1.75744100  | -1.05603200 | 1.27275300  |
| O | 4.54021700  | 0.37848800  | 0.81058700  |
| H | 3.97880100  | -0.33548700 | 1.18183000  |
| H | 5.44915000  | 0.06674400  | 0.87881000  |
| O | -0.15297700 | -2.16736700 | -1.20895300 |
| H | -0.10527600 | -1.52328500 | -0.45723300 |
| H | -0.81412200 | -2.82318300 | -0.96427900 |
| O | 2.62639700  | -2.46028400 | -1.25664000 |

|                       |             |             |             |
|-----------------------|-------------|-------------|-------------|
| H                     | 2.75696400  | -2.36785800 | -0.29535500 |
| H                     | 1.65282100  | -2.51461300 | -1.34665100 |
| O                     | 3.09556000  | 0.31199300  | -1.61116600 |
| H                     | 2.96707800  | -0.66028800 | -1.63346000 |
| H                     | 3.71280600  | 0.44607800  | -0.86445200 |
| C                     | 1.03457700  | 1.80935500  | 1.52502300  |
| H                     | 2.09445700  | 1.67538500  | 1.30223400  |
| H                     | 0.77303100  | 2.86359300  | 1.43302900  |
| H                     | 0.85258300  | 1.49606800  | 2.55404600  |
| C                     | 0.42271300  | 2.75163600  | -1.33265200 |
| H                     | 1.23405800  | 3.31169500  | -0.87343600 |
| H                     | 0.50876300  | 2.81664700  | -2.41690900 |
| H                     | -0.53499300 | 3.15490400  | -1.01187400 |
| H                     | -0.12884900 | 0.76086600  | -1.47302500 |
| C                     | -2.23116600 | 0.54948600  | 0.45865700  |
| C                     | -2.98972900 | 0.82917400  | -0.67952100 |
| C                     | -2.58665300 | -0.51205600 | 1.29447100  |
| C                     | -4.09729800 | 0.03820900  | -0.98902700 |
| H                     | -2.72465000 | 1.67242900  | -1.30684500 |
| C                     | -3.69069800 | -1.30037400 | 0.97561800  |
| H                     | -2.00095200 | -0.70774500 | 2.18292100  |
| C                     | -4.44784400 | -1.03136100 | -0.16658800 |
| H                     | -4.68546300 | 0.26321100  | -1.87158800 |
| H                     | -3.96402500 | -2.12408000 | 1.62577900  |
| H                     | -5.30798600 | -1.64544600 | -0.40723100 |
| <b>T</b>              |             |             |             |
| C                     | -0.46757600 | -0.87171800 | -0.06065200 |
| O                     | 0.80360800  | -0.54974200 | -0.86603600 |
| N                     | -1.43749500 | -1.20110000 | -1.11033100 |
| O                     | -0.87182600 | 0.20226400  | 0.63037400  |
| H                     | -3.15418000 | -1.37239100 | -0.29840700 |
| H                     | -1.57386600 | -0.34869100 | -1.64818100 |
| O                     | -2.63122400 | -0.52618200 | 2.66967600  |
| H                     | -1.90734700 | -0.24725400 | 2.06402200  |
| O                     | -3.15115200 | 1.53763900  | -0.00751100 |
| H                     | -2.31460800 | 1.04231900  | 0.21949900  |
| H                     | -3.41957700 | 1.97230000  | 0.81008400  |
| O                     | -1.76924100 | 3.53013900  | -1.56775300 |
| H                     | -0.96882700 | 3.36158400  | -1.03509000 |
| H                     | -2.40643000 | 2.91068700  | -1.16948800 |
| O                     | 0.18466900  | 2.65760500  | 0.28107200  |
| H                     | 1.14150500  | 2.58944500  | 0.19546100  |
| H                     | -0.13344500 | 1.72177100  | 0.40230000  |
| O                     | -4.03959600 | -1.23931300 | 0.12073100  |
| H                     | -4.14682400 | -0.27852500 | 0.03016100  |
| H                     | -3.27539000 | -0.89951800 | 2.04633200  |
| C                     | -0.16549800 | -2.11107200 | 0.79356700  |
| H                     | -1.09870500 | -2.47844700 | 1.22376100  |
| H                     | 0.29292300  | -2.91025500 | 0.20928000  |
| H                     | 0.50518500  | -1.85038900 | 1.61007600  |
| C                     | -1.13707000 | -2.31068300 | -2.02839800 |
| H                     | -1.89147500 | -2.31528600 | -2.81769600 |
| H                     | -0.14701200 | -2.23231500 | -2.48954900 |
| H                     | -1.20506200 | -3.26435700 | -1.50256000 |
| C                     | 2.01024200  | -0.29136400 | -0.30255700 |
| C                     | 2.22021400  | 0.10653100  | 1.02849000  |
| C                     | 3.12289600  | -0.40258200 | -1.15609500 |
| C                     | 3.51480400  | 0.36833900  | 1.48234800  |
| H                     | 1.37796300  | 0.22006800  | 1.69564300  |
| C                     | 4.40554100  | -0.12955300 | -0.69296000 |
| H                     | 2.95751800  | -0.70785500 | -2.18333600 |
| C                     | 4.61484100  | 0.25576300  | 0.63397500  |
| H                     | 3.65648000  | 0.67177500  | 2.51444600  |
| H                     | 5.24683300  | -0.22317700 | -1.37155800 |
| H                     | 5.61453900  | 0.46496400  | 0.99639600  |
| <b>TS<sub>8</sub></b> |             |             |             |
| C                     | -0.59982800 | -0.88172400 | -0.03975200 |
| O                     | 0.92941500  | -0.40524500 | -0.91795800 |

|   |             |             |             |
|---|-------------|-------------|-------------|
| N | -1.41729200 | -1.14852500 | -1.16847600 |
| O | -0.97046900 | 0.14153100  | 0.66291600  |
| H | -3.26694800 | -1.39017500 | -0.40866900 |
| H | -1.59167500 | -0.27533500 | -1.65583200 |
| O | -2.82667100 | -0.80424000 | 2.64339100  |
| H | -2.07131400 | -0.44319400 | 2.14127100  |
| O | -3.25963700 | 1.54046700  | 0.05902800  |
| H | -2.42376800 | 1.05957400  | 0.28965500  |
| H | -3.54901300 | 1.96247100  | 0.87638700  |
| O | -1.84654000 | 3.57864600  | -1.44949000 |
| H | -1.04364300 | 3.38161700  | -0.93141200 |
| H | -2.49119100 | 2.95562800  | -1.07183900 |
| O | 0.14686400  | 2.63536700  | 0.34098700  |
| H | 1.09631400  | 2.55113200  | 0.19883300  |
| H | -0.17281900 | 1.70830500  | 0.44506600  |
| O | -4.13480100 | -1.22657700 | 0.01682400  |
| H | -4.20101100 | -0.25801700 | -0.03736600 |
| H | -3.42514800 | -1.08827900 | 1.93159300  |
| C | -0.13639300 | -2.12330000 | 0.70373900  |
| H | -1.01251800 | -2.60958200 | 1.14273400  |
| H | 0.37234500  | -2.83475300 | 0.05504700  |
| H | 0.53394700  | -1.83682600 | 1.51100200  |
| C | -1.07233600 | -2.22224800 | -2.10885900 |
| H | -1.76895300 | -2.17542200 | -2.94725500 |
| H | -0.05064600 | -2.13314900 | -2.48710700 |
| H | -1.19340800 | -3.19576300 | -1.63193100 |
| C | 2.11486600  | -0.21688700 | -0.34971200 |
| C | 2.30587400  | 0.13926600  | 1.00774600  |
| C | 3.27686200  | -0.34689500 | -1.15123600 |
| C | 3.58720300  | 0.34068200  | 1.52176100  |
| H | 1.44339500  | 0.26041700  | 1.65015400  |
| C | 4.54729700  | -0.13300500 | -0.62772400 |
| H | 3.15017000  | -0.61914800 | -2.19407800 |
| C | 4.71988900  | 0.21030800  | 0.71725300  |
| H | 3.69715400  | 0.61072800  | 2.56776000  |
| H | 5.41287400  | -0.24018700 | -1.27444200 |
| H | 5.71099600  | 0.37284600  | 1.12487800  |

**AM...AL-**

|   |             |             |             |
|---|-------------|-------------|-------------|
| C | 1.98102900  | 0.72530300  | 1.23623300  |
| O | -2.63665200 | 0.90370900  | -1.10273200 |
| N | 2.01053900  | 1.94354700  | 0.69067000  |
| O | 1.94541700  | -0.30859800 | 0.51906900  |
| H | 6.10235500  | -1.74036600 | -0.59992100 |
| H | 1.96499000  | 1.99110500  | -0.33214700 |
| O | 3.35742500  | -2.71205600 | 1.30204100  |
| H | 2.79932700  | -1.93558600 | 1.12032800  |
| O | 3.27424300  | -0.63938900 | -1.89577500 |
| H | 2.74608400  | -0.52203700 | -1.07374500 |
| H | 2.75207000  | -1.22566400 | -2.45665400 |
| O | 1.71206600  | 1.89070600  | -2.25959800 |
| H | 0.92347800  | 1.30838800  | -2.14303100 |
| H | 2.42464000  | 1.26719700  | -2.46467700 |
| O | -0.24279400 | 0.07948300  | -1.62391500 |
| H | -1.19028800 | 0.35472400  | -1.37553100 |
| H | 0.18416300  | -0.22525100 | -0.81149800 |
| O | 5.29117500  | -2.22893800 | -0.77658100 |
| H | 4.70811500  | -1.61157700 | -1.26494600 |
| H | 4.09465600  | -2.62316900 | 0.67161000  |
| C | 1.99527100  | 0.61675600  | 2.74002000  |
| H | 2.94464600  | 0.98560900  | 3.13837900  |
| H | 1.19819900  | 1.21651500  | 3.18528200  |
| H | 1.86936600  | -0.42401800 | 3.02905700  |
| C | 2.03123200  | 3.20620700  | 1.42545100  |
| H | 2.14694800  | 4.01255100  | 0.70331200  |
| H | 1.10177100  | 3.36764600  | 1.97746600  |
| H | 2.86979300  | 3.24767200  | 2.12315800  |
| C | -3.57358000 | 0.20526100  | -0.52324400 |
| C | -3.34847500 | -1.10383000 | -0.00128300 |
| C | -4.89823500 | 0.71319800  | -0.37154300 |



|   |             |             |             |
|---|-------------|-------------|-------------|
| C | -4.36258700 | -1.83141800 | 0.61564700  |
| H | -2.35494700 | -1.53234800 | -0.09507200 |
| C | -5.90194400 | -0.02499600 | 0.24779900  |
| H | -5.10973200 | 1.70674700  | -0.75652200 |
| C | -5.65267700 | -1.30716700 | 0.75094700  |
| H | -4.14312400 | -2.82480100 | 0.99768800  |
| H | -6.89556400 | 0.40527500  | 0.33999500  |
| H | -6.43795900 | -1.87865300 | 1.23254400  |

**TS<sub>9</sub>**

|   |             |             |             |
|---|-------------|-------------|-------------|
| C | 0.17674000  | -0.80020800 | -0.36179300 |
| O | -1.26008600 | -1.14959600 | -0.70527400 |
| N | 0.32437400  | -0.70023500 | 1.11152400  |
| O | 0.56946600  | 0.33735100  | -0.94814000 |
| H | 1.95153500  | -0.32200900 | 1.48974500  |
| O | 3.03678100  | 0.57124100  | -1.72804400 |
| H | 3.13168200  | 0.79590100  | -2.66021400 |
| H | 2.04782000  | 0.41182700  | -1.54060300 |
| O | 4.42933000  | -1.32270400 | -0.19681500 |
| H | 4.11066700  | -0.73721200 | -0.91315300 |
| H | 5.39164600  | -1.27591900 | -0.21633100 |
| O | 0.72334600  | 2.69234200  | 0.08927300  |
| H | 0.54529300  | 1.79074500  | -0.34809500 |
| H | 0.47034900  | 3.38000300  | -0.53663700 |
| O | 3.17641000  | 2.08100900  | 0.45132700  |
| H | 3.33519400  | 1.70081400  | -0.45727500 |
| H | 2.24236500  | 2.48991000  | 0.36887700  |
| O | 2.90121400  | -0.00973400 | 1.68888700  |
| H | 3.06183900  | 1.16207600  | 1.08407400  |
| H | 3.50308500  | -0.61592200 | 1.20034000  |
| C | 0.89557100  | -2.04495300 | -0.89307900 |
| H | 1.95352000  | -2.00413900 | -0.63289900 |
| H | 0.46932200  | -2.96772200 | -0.49879800 |
| H | 0.80004800  | -2.05728500 | -1.97948500 |
| C | -0.17484300 | -1.81720300 | 1.93456700  |
| H | 0.44268800  | -2.70230000 | 1.77937000  |
| H | -0.09368200 | -1.53224700 | 2.98491700  |
| H | -1.21685300 | -2.07293900 | 1.71953900  |
| H | -0.13618800 | 0.15676200  | 1.40543400  |
| C | -2.34855500 | -0.40476600 | -0.38102100 |
| C | -2.34354400 | 0.90528000  | 0.12056900  |
| C | -3.58679100 | -1.03917900 | -0.59453000 |
| C | -3.55221300 | 1.54580600  | 0.40964700  |
| H | -1.42032900 | 1.44345500  | 0.26691100  |
| C | -4.78067600 | -0.38740100 | -0.31070200 |
| H | -3.58620300 | -2.05065300 | -0.98483800 |
| C | -4.77487400 | 0.91394800  | 0.19989400  |
| H | -3.52542900 | 2.55877000  | 0.79731400  |
| H | -5.72067700 | -0.89996300 | -0.48528300 |
| H | -5.70488200 | 1.42248500  | 0.42539200  |

**T<sup>-</sup>...H<sub>3</sub>O<sup>+</sup>**

|   |             |             |             |
|---|-------------|-------------|-------------|
| C | 0.17135200  | -0.79342700 | -0.36720700 |
| O | -1.26406000 | -1.13613400 | -0.72876900 |
| N | 0.30573700  | -0.69246300 | 1.10291100  |
| O | 0.57377500  | 0.34335500  | -0.95431000 |
| H | 1.98141500  | -0.32796100 | 1.51978800  |
| O | 3.04148900  | 0.56819100  | -1.71284300 |
| H | 3.14473600  | 0.80351700  | -2.64162600 |
| H | 2.04916000  | 0.40781400  | -1.53372300 |
| O | 4.44331000  | -1.34286200 | -0.19408800 |
| H | 4.11877900  | -0.75321100 | -0.90336600 |
| H | 5.40536300  | -1.29793600 | -0.22551100 |
| O | 0.75263700  | 2.67297800  | 0.09558700  |
| H | 0.56178600  | 1.77037300  | -0.34694700 |
| H | 0.50259500  | 3.36891900  | -0.52258200 |
| O | 3.18298700  | 2.08047600  | 0.43533300  |
| H | 3.33306100  | 1.67358700  | -0.46895400 |
| H | 2.23049700  | 2.47801700  | 0.35422200  |
| O | 2.92191200  | -0.02555100 | 1.72664400  |

|   |             |             |             |
|---|-------------|-------------|-------------|
| H | 3.09279100  | 1.21687000  | 1.07215000  |
| H | 3.51727600  | -0.63122500 | 1.23413500  |
| C | 0.89048900  | -2.03948900 | -0.89413800 |
| H | 1.94757800  | -1.99849100 | -0.63058200 |
| H | 0.46242900  | -2.96088200 | -0.49868400 |
| H | 0.79811900  | -2.05486100 | -1.98080000 |
| C | -0.21260500 | -1.80132500 | 1.92363700  |
| H | 0.39323200  | -2.69520800 | 1.77213400  |
| H | -0.13153800 | -1.51696000 | 2.97420700  |
| H | -1.25750000 | -2.04411900 | 1.70596300  |
| H | -0.14203000 | 0.17211500  | 1.39361200  |
| C | -2.35335800 | -0.39797300 | -0.39251600 |
| C | -2.34919600 | 0.91700700  | 0.09610100  |
| C | -3.59047100 | -1.04205500 | -0.58171900 |
| C | -3.55729100 | 1.55300800  | 0.39696900  |
| H | -1.42666500 | 1.46121700  | 0.22315100  |
| C | -4.78417000 | -0.39450300 | -0.28730200 |
| H | -3.58922900 | -2.05741600 | -0.96182700 |
| C | -4.77890100 | 0.91164400  | 0.21084800  |
| H | -3.53132300 | 2.56979100  | 0.77455500  |
| H | -5.72348600 | -0.91431300 | -0.44315500 |
| H | -5.70869900 | 1.41665200  | 0.44500700  |

**TS<sub>10</sub>**

|   |             |             |             |
|---|-------------|-------------|-------------|
| C | 0.31130300  | -0.74425300 | -0.45451900 |
| O | -1.43101300 | -1.05680000 | -1.04815300 |
| N | 0.19054600  | -0.64328400 | 0.96002500  |
| O | 0.73364000  | 0.32494600  | -1.03832900 |
| H | 1.93739800  | -0.29711900 | 1.61902800  |
| O | 3.33473000  | 0.49298700  | -1.60580500 |
| H | 3.57307700  | 0.71310000  | -2.51383600 |
| H | 2.34534200  | 0.35725400  | -1.57463800 |
| O | 4.40202700  | -1.50412900 | 0.11969100  |
| H | 4.22954600  | -0.91986700 | -0.64239300 |
| H | 5.35968500  | -1.59397000 | 0.17971100  |
| O | 0.90951500  | 2.71743100  | 0.02039800  |
| H | 0.69951100  | 1.84354500  | -0.43030300 |
| H | 0.71696400  | 3.42676700  | -0.60356700 |
| O | 3.29058200  | 2.04287000  | 0.53430300  |
| H | 3.51098300  | 1.61230800  | -0.34332900 |
| H | 2.36097900  | 2.46874300  | 0.37333100  |
| O | 2.85941000  | -0.03155000 | 1.87053500  |
| H | 3.13148100  | 1.21710800  | 1.18239300  |
| H | 3.45059900  | -0.67920800 | 1.42428200  |
| C | 0.83143300  | -2.07154600 | -0.97032200 |
| H | 1.88061400  | -2.17856800 | -0.68010900 |
| H | 0.27006600  | -2.92105100 | -0.58807100 |
| H | 0.76742800  | -2.06710800 | -2.05748900 |
| C | -0.39921400 | -1.74455900 | 1.73616600  |
| H | 0.25394600  | -2.61683600 | 1.70543600  |
| H | -0.47892100 | -1.42180100 | 2.77486300  |
| H | -1.39023900 | -2.02659100 | 1.37272100  |
| H | -0.24102300 | 0.24552800  | 1.19801300  |
| C | -2.47094600 | -0.39006800 | -0.56517200 |
| C | -2.44737800 | 0.99206100  | -0.25880200 |
| C | -3.69555200 | -1.07403500 | -0.35598100 |
| C | -3.58021600 | 1.63861000  | 0.23714400  |
| H | -1.54349500 | 1.55889400  | -0.43815600 |
| C | -4.82220300 | -0.41487100 | 0.12338900  |
| H | -3.73502800 | -2.13381700 | -0.58676200 |
| C | -4.77697300 | 0.94885400  | 0.43323900  |
| H | -3.52643600 | 2.69981900  | 0.46089900  |
| H | -5.74426500 | -0.97089800 | 0.26338500  |
| H | -5.65468300 | 1.45957000  | 0.81243600  |

**AM...H<sub>3</sub>O<sup>+</sup>...AL<sup>-</sup>**

|   |             |            |             |
|---|-------------|------------|-------------|
| C | 0.72974800  | 1.21331300 | 0.31829700  |
| O | -3.10820500 | 0.61015300 | 0.26852900  |
| N | 0.30617000  | 2.38112100 | -0.17060000 |
| O | 1.75297900  | 0.65542400 | -0.15957800 |

|   |             |             |             |
|---|-------------|-------------|-------------|
| H | 7.31086700  | 0.07640500  | -0.05110800 |
| H | 0.87101100  | 2.78718300  | -0.90439000 |
| O | 3.08621200  | -1.57755700 | 0.42358500  |
| H | 2.55052100  | -2.37973200 | 0.45382200  |
| H | 2.46403400  | -0.80787000 | 0.32015200  |
| O | 5.30514400  | -1.13273000 | 2.17285000  |
| H | 4.45010400  | -1.36858600 | 1.76646100  |
| H | 5.48943700  | -1.81432800 | 2.82885600  |
| O | 3.56095700  | 1.06196500  | -2.13080400 |
| H | 2.80693400  | 1.05879200  | -1.49069800 |
| H | 3.18329500  | 1.13482300  | -3.01536600 |
| O | 4.77661300  | -1.07171500 | -1.49798900 |
| H | 4.11908300  | -1.41954600 | -0.81204100 |
| H | 4.35893000  | -0.19297400 | -1.84557300 |
| O | 6.83099500  | -0.76011000 | -0.03844800 |
| H | 5.65649800  | -0.88623300 | -0.99045300 |
| H | 6.43455700  | -0.85613700 | 0.86138000  |
| C | -0.05197900 | 0.59061900  | 1.43904400  |
| H | -0.07560700 | 1.26296800  | 2.30129500  |
| H | -1.08861000 | 0.41824600  | 1.12320500  |
| H | 0.41332300  | -0.34819400 | 1.73210900  |
| C | -0.86337200 | 3.13557800  | 0.28694000  |
| H | -0.67153100 | 3.61367200  | 1.25145000  |
| H | -1.06763800 | 3.91175100  | -0.44886200 |
| H | -1.73330800 | 2.48094500  | 0.36280400  |
| C | -4.19274200 | -0.06493100 | 0.06816100  |
| C | -4.20401200 | -1.31139000 | -0.64063700 |
| C | -5.47381700 | 0.37532700  | 0.53883500  |
| C | -5.37438700 | -2.03373000 | -0.85068000 |
| H | -3.25686200 | -1.68674400 | -1.01949900 |
| C | -6.63568400 | -0.35795800 | 0.31966500  |
| H | -5.51908900 | 1.31535000  | 1.08283400  |
| C | -6.60910900 | -1.57338500 | -0.37595400 |
| H | -5.32579700 | -2.97366100 | -1.39495300 |
| H | -7.58103800 | 0.02267500  | 0.69843700  |
| H | -7.51775400 | -2.14075400 | -0.54283400 |

**(AM...AL) :**

|   |             |             |             |
|---|-------------|-------------|-------------|
| C | -4.24781600 | -1.60284900 | 0.55232000  |
| O | 3.67333500  | -1.00667700 | 0.54577500  |
| N | -4.96548100 | -1.23707200 | -0.51929700 |
| O | -3.65411700 | -0.76937000 | 1.26773600  |
| H | -5.05229200 | -0.23909200 | -0.72173600 |
| H | -0.19072400 | 1.15167500  | -0.86092300 |
| O | -2.58169500 | 1.67704400  | 1.20782200  |
| H | -2.51046900 | 1.92178700  | 2.13819700  |
| H | -3.03262300 | 0.79270700  | 1.19120000  |
| O | 2.13455400  | 1.04393400  | 1.44000100  |
| H | 1.87105400  | 0.98170400  | 2.36460400  |
| H | 3.14144600  | -0.23570400 | 0.85539900  |
| O | -0.08934100 | 1.65413100  | -0.04502000 |
| H | 1.31381700  | 1.24580200  | 0.93473500  |
| H | -0.96813900 | 1.63631700  | 0.39084600  |
| O | -4.04815000 | 3.42347400  | -0.36794600 |
| H | -3.47340800 | 2.88196000  | 0.21448500  |
| H | -3.45335300 | 3.93808400  | -0.92441100 |
| O | -5.59158100 | 1.45254600  | -1.52475800 |
| H | -5.08901500 | 2.21583900  | -1.16540500 |
| H | -6.52077700 | 1.69584700  | -1.45320900 |
| C | -4.17459000 | -3.07674200 | 0.87819700  |
| H | -5.17292900 | -3.49438200 | 1.03193100  |
| H | -3.71150700 | -3.63163300 | 0.05782100  |
| H | -3.58309600 | -3.21234100 | 1.78079300  |
| C | -5.69204000 | -2.14144000 | -1.40618900 |
| H | -6.49398200 | -2.66880400 | -0.88302600 |
| H | -6.13665200 | -1.54257100 | -2.19939300 |
| H | -5.02726800 | -2.87721500 | -1.86440800 |
| C | 4.89174400  | -0.61973000 | 0.08130500  |
| C | 5.29564100  | 0.72158600  | 0.04865800  |
| C | 5.76285300  | -1.61542800 | -0.37787200 |

|   |            |             |             |
|---|------------|-------------|-------------|
| C | 6.55917700 | 1.05371000  | -0.43974000 |
| H | 4.62084500 | 1.49155800  | 0.40527000  |
| C | 7.02171200 | -1.27018400 | -0.86304800 |
| H | 5.44120800 | -2.65037900 | -0.34781000 |
| C | 7.43045500 | 0.06504300  | -0.89810800 |
| H | 6.86110200 | 2.09534000  | -0.46037100 |
| H | 7.68727100 | -2.05079500 | -1.21537900 |
| H | 8.41100500 | 0.32935200  | -1.27614000 |

**T<sub>3</sub><sup>±</sup>**

|   |             |             |             |
|---|-------------|-------------|-------------|
| C | 0.10315000  | 0.48318000  | -0.48308500 |
| O | 1.32753800  | 0.90674100  | 0.22079500  |
| N | -0.85717300 | 1.64686000  | 0.04496400  |
| O | -0.38522400 | -0.64897200 | -0.07755100 |
| H | -1.77249500 | 1.50281700  | -0.42359500 |
| O | -1.37235000 | -0.09158700 | 2.42083900  |
| H | -0.99384500 | -0.50994200 | 1.61531900  |
| H | -2.31649300 | -0.33959900 | 2.41184900  |
| O | -4.12820600 | -0.79216000 | 2.19465000  |
| H | -4.26875600 | -1.00299000 | 1.24848500  |
| H | -4.45957500 | -1.55325700 | 2.68340100  |
| O | -1.98319400 | -2.32125200 | -1.34209900 |
| H | -1.32273900 | -1.70413900 | -0.91354700 |
| H | -1.74342600 | -3.21167900 | -1.06414800 |
| O | -4.28444400 | -1.20186800 | -0.56731400 |
| H | -5.05965500 | -1.58563100 | -0.99284300 |
| H | -3.49652500 | -1.72543200 | -0.87355600 |
| O | -3.42861400 | 1.37055300  | -1.20996400 |
| H | -3.84108900 | 0.50341000  | -1.01063400 |
| H | -4.08232300 | 2.03598000  | -0.96829900 |
| C | 0.27834800  | 0.66395900  | -1.99175900 |
| H | -0.68812800 | 0.54716800  | -2.48569900 |
| H | 0.70070400  | 1.63612300  | -2.24863500 |
| H | 0.94721100  | -0.11202700 | -2.36358100 |
| C | -0.44985200 | 3.07083900  | -0.08671800 |
| H | -0.36908900 | 3.33062200  | -1.13988400 |
| H | -1.21323200 | 3.69407900  | 0.37892100  |
| H | 0.50520500  | 3.21715000  | 0.40909700  |
| H | -1.01115500 | 1.40231500  | 1.03388000  |
| C | 2.48277800  | 0.17409500  | 0.15937100  |
| C | 2.58432400  | -1.14288400 | -0.30622800 |
| C | 3.62926900  | 0.82968200  | 0.63074800  |
| C | 3.82856800  | -1.77737400 | -0.30652200 |
| H | 1.70332600  | -1.66778100 | -0.64418000 |
| C | 4.85976300  | 0.18102100  | 0.63178800  |
| H | 3.53687200  | 1.84797000  | 0.99049800  |
| C | 4.97038900  | -1.12892000 | 0.15947400  |
| H | 3.89564200  | -2.79671900 | -0.67137900 |
| H | 5.73595000  | 0.70394300  | 0.99929700  |
| H | 5.92937300  | -1.63361300 | 0.15720500  |

**TS<sub>11</sub>**

|   |             |             |             |
|---|-------------|-------------|-------------|
| C | 0.11866200  | 0.41453800  | -0.31787800 |
| O | 1.30952400  | 0.85381900  | 0.35546700  |
| N | -0.85268900 | 1.53501500  | 0.00172500  |
| O | -0.40390300 | -0.72944100 | 0.24248900  |
| H | -1.67697700 | 1.40545500  | -0.60787500 |
| O | -1.45102200 | 0.39881100  | 2.14119800  |
| H | -0.87241500 | -0.42166900 | 1.18090500  |
| H | -2.39958300 | 0.20321400  | 2.20679900  |
| O | -4.36710400 | -0.27774300 | 2.02276700  |
| H | -4.44244700 | -0.65032200 | 1.12208900  |
| H | -4.72917700 | -0.95018100 | 2.60961800  |
| O | -2.04230100 | -2.59043900 | -0.93235600 |
| H | -1.38558500 | -1.96816000 | -0.54416000 |
| H | -1.91631000 | -3.43019400 | -0.47698400 |
| O | -4.33363900 | -1.17972900 | -0.64860100 |
| H | -5.09888400 | -1.59318200 | -1.06435200 |
| H | -3.57251800 | -1.80042200 | -0.76899800 |
| O | -3.24877100 | 1.20307400  | -1.63538700 |

|   |             |             |             |
|---|-------------|-------------|-------------|
| H | -3.73884300 | 0.40876400  | -1.33764800 |
| H | -3.88645200 | 1.92525400  | -1.62427100 |
| C | 0.33245100  | 0.25643500  | -1.81569000 |
| H | -0.62314400 | 0.05054000  | -2.29930900 |
| H | 0.76480400  | 1.16059000  | -2.24620400 |
| H | 1.00600600  | -0.57858900 | -2.00731000 |
| C | -0.37814700 | 2.93337600  | -0.11591200 |
| H | 0.01888900  | 3.13299600  | -1.11184500 |
| H | -1.23094400 | 3.58801900  | 0.06374900  |
| H | 0.38978600  | 3.12396800  | 0.62815600  |
| H | -1.22133900 | 1.22850600  | 1.08102200  |
| C | 2.50375100  | 0.17045600  | 0.22485500  |
| C | 2.61036200  | -1.22305200 | 0.24936100  |
| C | 3.65225400  | 0.96146900  | 0.13864200  |
| C | 3.87324600  | -1.81188500 | 0.16898800  |
| H | 1.72124500  | -1.83091400 | 0.33523200  |
| C | 4.90736000  | 0.36072000  | 0.07380800  |
| H | 3.54740700  | 2.03987600  | 0.12417400  |
| C | 5.02453100  | -1.02992000 | 0.08377300  |
| H | 3.95223300  | -2.89332600 | 0.18393800  |
| H | 5.79329400  | 0.98237600  | 0.00867200  |
| H | 6.00067700  | -1.49734800 | 0.02821500  |

**T<sub>1</sub><sup>o</sup>**

|   |             |             |             |
|---|-------------|-------------|-------------|
| C | 0.18562600  | 0.53557700  | -0.31592500 |
| O | 1.33051700  | 0.78810700  | 0.51891300  |
| N | -0.75824600 | 1.57696000  | 0.07514400  |
| O | -0.39665200 | -0.71262600 | 0.00270800  |
| H | -1.62064900 | 1.43460500  | -0.45526200 |
| O | -1.60872700 | 0.07466100  | 2.38063700  |
| H | -0.78551800 | -0.63916700 | 0.90553200  |
| H | -2.56557000 | -0.11968500 | 2.30681600  |
| O | -4.32452700 | -0.56679600 | 2.01855400  |
| H | -4.43620900 | -0.84584500 | 1.08625600  |
| H | -4.69239100 | -1.27918400 | 2.55265700  |
| O | -2.10164400 | -2.36745100 | -1.44236000 |
| H | -1.42242700 | -1.82507300 | -0.98918900 |
| H | -1.90947600 | -3.28318500 | -1.21199400 |
| O | -4.41301300 | -1.15131200 | -0.71065200 |
| H | -5.19322400 | -1.52608100 | -1.13513800 |
| H | -3.64186900 | -1.70022200 | -0.99519100 |
| O | -3.48140400 | 1.43008500  | -1.38070800 |
| H | -3.91449900 | 0.57819700  | -1.17713900 |
| H | -4.10113300 | 2.10801300  | -1.09052900 |
| C | 0.55520400  | 0.50420600  | -1.79652300 |
| H | -0.35419100 | 0.39643900  | -2.38970900 |
| H | 1.05720000  | 1.42808900  | -2.08474500 |
| H | 1.21586700  | -0.33478500 | -2.01647100 |
| C | -0.31761900 | 2.96974000  | -0.08928900 |
| H | -0.04080500 | 3.22608900  | -1.11990200 |
| H | -1.14010700 | 3.62080300  | 0.21172300  |
| H | 0.53369900  | 3.17044600  | 0.55958700  |
| H | -1.45252300 | 0.87173400  | 1.83254200  |
| C | 2.52784600  | 0.12893700  | 0.30722800  |
| C | 2.63628000  | -1.26469700 | 0.31754500  |
| C | 3.66981400  | 0.92030800  | 0.16844900  |
| C | 3.89152500  | -1.85511100 | 0.16956900  |
| H | 1.74935100  | -1.87097900 | 0.43846500  |
| C | 4.92065300  | 0.31971700  | 0.03491800  |
| H | 3.56530600  | 1.99889700  | 0.16860600  |
| C | 5.03671200  | -1.07064700 | 0.02981700  |
| H | 3.97225500  | -2.93651600 | 0.17395100  |
| H | 5.80318900  | 0.94076800  | -0.07021500 |
| H | 6.00879300  | -1.53760500 | -0.07814200 |

**T<sub>2</sub><sup>o</sup>**

|   |             |            |             |
|---|-------------|------------|-------------|
| C | 0.46447900  | 1.22597300 | -0.37479000 |
| O | 1.44445800  | 0.48296500 | -1.20866400 |
| N | 1.05947700  | 2.15505600 | 0.53194900  |
| O | -0.21805800 | 0.30619400 | 0.43873100  |

|   |             |             |             |
|---|-------------|-------------|-------------|
| H | -5.96760000 | 0.57822200  | 0.42609000  |
| H | 1.60629200  | 1.65569900  | 1.22506500  |
| O | -1.97015600 | -1.52588200 | -0.68090700 |
| H | -1.68307800 | -2.38874200 | -1.00077900 |
| H | -0.73898000 | -0.32651100 | -0.10238100 |
| O | -4.08189800 | -0.53377900 | -2.08409600 |
| H | -2.68120700 | -1.22083000 | -1.29623100 |
| H | -4.51862300 | -1.05538300 | -2.76627800 |
| O | -1.83551400 | 0.86129300  | 2.64697800  |
| H | -1.16750400 | 0.78676600  | 1.93503700  |
| H | -1.34998400 | 0.76674700  | 3.47371500  |
| O | -3.54573300 | -1.15515600 | 1.71153300  |
| H | -2.96985600 | -1.45386200 | 0.98401300  |
| H | -3.02122700 | -0.45797900 | 2.15673100  |
| O | -5.63611900 | -0.28766000 | 0.16461300  |
| H | -4.94956100 | -0.53250800 | 0.82959000  |
| H | -4.74403500 | -0.40808600 | -1.36592600 |
| C | -0.44138300 | 1.88784800  | -1.40345200 |
| H | -1.19670400 | 2.48579200  | -0.89216100 |
| H | 0.13007000  | 2.52746700  | -2.07569900 |
| H | -0.93432800 | 1.11984300  | -2.00038900 |
| C | 1.79765300  | 3.28776100  | -0.02894400 |
| H | 1.10855300  | 4.01061600  | -0.46925000 |
| H | 2.32403300  | 3.78672200  | 0.78536900  |
| H | 2.53248700  | 3.00400100  | -0.79326200 |
| C | 2.35126400  | -0.35046200 | -0.58218800 |
| C | 2.09269300  | -1.72271600 | -0.52522200 |
| C | 3.55683600  | 0.14953100  | -0.08196500 |
| C | 3.02928600  | -2.58685000 | 0.03863200  |
| H | 1.16491900  | -2.10253400 | -0.93517500 |
| C | 4.48882800  | -0.72092300 | 0.48586100  |
| H | 3.77387100  | 1.20751300  | -0.15732200 |
| C | 4.22850000  | -2.08901200 | 0.55148300  |
| H | 2.82244400  | -3.65065300 | 0.07475900  |
| H | 5.42300500  | -0.32579500 | 0.86920600  |
| H | 4.95590700  | -2.76259000 | 0.98964100  |

**TS<sub>12</sub>**

|   |             |             |             |
|---|-------------|-------------|-------------|
| C | 0.36099900  | 1.61410500  | 0.19083800  |
| O | 1.63271200  | 0.81780700  | -1.31380700 |
| N | 1.18477800  | 1.97137800  | 1.16985800  |
| O | -0.33790800 | 0.51645200  | 0.45497000  |
| H | -5.94906300 | -0.34446600 | 1.19120500  |
| H | 1.45735400  | 1.23225300  | 1.80439800  |
| O | -2.04203300 | -0.43174900 | -1.33218200 |
| H | -1.72579200 | -0.74423400 | -2.18801000 |
| H | -0.91674300 | 0.23491400  | -0.30792900 |
| O | -4.39045400 | 0.88128500  | -1.47872300 |
| H | -2.87115000 | 0.08698300  | -1.50018700 |
| H | -4.88630800 | 0.92369300  | -2.30372700 |
| O | -1.51446500 | -0.98081600 | 2.66856900  |
| H | -0.96193000 | -0.43091900 | 2.08958100  |
| H | -0.90018300 | -1.54037000 | 3.15723700  |
| O | -3.24261800 | -2.08911000 | 0.73443100  |
| H | -2.77392600 | -1.73267900 | -0.04068300 |
| H | -2.69503300 | -1.80075700 | 1.49199200  |
| O | -5.60187500 | -0.72657900 | 0.37786800  |
| H | -4.80942200 | -1.25320200 | 0.63635600  |
| H | -4.94800700 | 0.37431700  | -0.84375200 |
| C | -0.18056900 | 2.62633000  | -0.76661400 |
| H | -0.92330600 | 3.23868600  | -0.24420500 |
| H | 0.60916200  | 3.26868800  | -1.14744000 |
| H | -0.66081800 | 2.12448600  | -1.60310500 |
| C | 2.01081300  | 3.17424800  | 1.15155300  |
| H | 1.38826600  | 4.06746800  | 1.09318300  |
| H | 2.57536600  | 3.20878400  | 2.08105800  |
| H | 2.70826300  | 3.16252300  | 0.31038300  |
| C | 2.33703700  | -0.20235200 | -0.88394100 |
| C | 1.94960000  | -1.54477400 | -1.15253700 |
| C | 3.52411000  | -0.02903100 | -0.11991400 |

|   |            |             |             |
|---|------------|-------------|-------------|
| C | 2.70263500 | -2.62530100 | -0.70363100 |
| H | 1.04896000 | -1.70956500 | -1.73587000 |
| C | 4.26850800 | -1.11867300 | 0.32867600  |
| H | 3.85975200 | 0.98126200  | 0.08953600  |
| C | 3.86866500 | -2.42693000 | 0.04429200  |
| H | 2.37795500 | -3.63521700 | -0.93694000 |
| H | 5.17368300 | -0.94470400 | 0.90328000  |
| H | 4.45181300 | -3.27164700 | 0.39329000  |

**AM<sup>+</sup>...AL<sup>-</sup>**

|   |             |             |             |
|---|-------------|-------------|-------------|
| C | 0.27593200  | 1.78058600  | 0.30720100  |
| O | 1.77228900  | 0.82726500  | -1.46309500 |
| N | 1.16662200  | 2.06619000  | 1.22581700  |
| O | -0.39079600 | 0.66874900  | 0.48913300  |
| H | -5.85789000 | -0.67553600 | 1.31174900  |
| H | 1.38186300  | 1.32986500  | 1.88649700  |
| O | -2.06904000 | -0.14533800 | -1.31116900 |
| H | -1.75250600 | -0.31933600 | -2.20569700 |
| H | -1.01079100 | 0.43762600  | -0.27338500 |
| O | -4.49397300 | 0.98489900  | -1.22585600 |
| H | -2.94293400 | 0.32360600  | -1.38928800 |
| H | -5.02201300 | 1.09886000  | -2.02368100 |
| O | -1.30345500 | -1.32569400 | 2.50933300  |
| H | -0.81768500 | -0.64280800 | 2.02220000  |
| H | -0.63084700 | -1.93057400 | 2.84299300  |
| O | -3.09297500 | -2.19215600 | 0.50753100  |
| H | -2.67877900 | -1.69773800 | -0.22041900 |
| H | -2.51873500 | -1.99950200 | 1.27549000  |
| O | -5.52950100 | -0.92284100 | 0.44049500  |
| H | -4.70267700 | -1.43754100 | 0.59284800  |
| H | -4.99428700 | 0.36573400  | -0.64446300 |
| C | -0.14905300 | 2.77384200  | -0.71691800 |
| H | -0.87188900 | 3.45740100  | -0.25734500 |
| H | 0.69910900  | 3.34643700  | -1.08212000 |
| H | -0.62508800 | 2.26817000  | -1.55258700 |
| C | 2.00461400  | 3.26422600  | 1.25066500  |
| H | 1.39008700  | 4.16326400  | 1.21621000  |
| H | 2.56439800  | 3.26036400  | 2.18290100  |
| H | 2.70349600  | 3.26187800  | 0.41228300  |
| C | 2.37089300  | -0.21919600 | -0.98770900 |
| C | 1.93526700  | -1.55060000 | -1.28191400 |
| C | 3.50423000  | -0.12398800 | -0.11874100 |
| C | 2.57725400  | -2.66910100 | -0.76132700 |
| H | 1.07832300  | -1.67015700 | -1.93926400 |
| C | 4.13555900  | -1.25286500 | 0.39698700  |
| H | 3.87891900  | 0.86624600  | 0.12335200  |
| C | 3.68458700  | -2.54046000 | 0.08668100  |
| H | 2.21029500  | -3.65939000 | -1.01830000 |
| H | 4.99590500  | -1.12794800 | 1.04938000  |
| H | 4.18129700  | -3.41598000 | 0.48938700  |

**T<sub>4</sub><sup>±</sup>**

|   |             |             |             |
|---|-------------|-------------|-------------|
| C | 0.23801000  | -0.79096800 | -0.23151700 |
| O | -0.86033500 | -0.05903700 | 0.55626300  |
| N | 1.32040300  | -0.84542000 | 0.92132600  |
| O | 0.70183200  | -0.13309500 | -1.22900300 |
| H | 2.16832200  | -1.25753700 | 0.48601600  |
| H | 1.57245700  | 0.13948600  | 1.13452300  |
| O | 2.40812500  | 1.83308000  | -1.30090400 |
| H | 2.14404800  | 2.49823100  | -1.94581300 |
| H | 1.69634000  | 1.11856800  | -1.29638200 |
| O | -0.52467100 | 2.35832900  | 2.04754400  |
| H | -1.06046400 | 3.06373800  | 1.66832400  |
| H | -0.72726600 | 1.56008300  | 1.52285500  |
| O | 2.16911400  | 1.88696300  | 1.49549800  |
| H | 1.30832200  | 2.28447200  | 1.72954500  |
| H | 2.32244200  | 2.12543300  | 0.56156600  |
| O | 4.70961700  | 0.34495500  | -1.54281900 |
| H | 3.95113000  | 0.97068900  | -1.50846100 |
| H | 5.47104100  | 0.82974800  | -1.20618900 |

|   |             |             |             |
|---|-------------|-------------|-------------|
| O | 3.81659100  | -1.82767700 | -0.10443600 |
| H | 4.20768400  | -1.10080500 | -0.64035200 |
| H | 3.88082300  | -2.62176500 | -0.64608300 |
| C | -0.24597200 | -2.21219000 | -0.52217300 |
| H | 0.60190800  | -2.81094400 | -0.86178100 |
| H | -0.70930400 | -2.69656000 | 0.33789100  |
| H | -0.97359100 | -2.16660500 | -1.33253000 |
| C | 1.01509100  | -1.55881100 | 2.19047900  |
| H | 0.92251900  | -2.62562700 | 2.00048400  |
| H | 1.83475900  | -1.38880900 | 2.88827400  |
| H | 0.08862200  | -1.17045500 | 2.60500300  |
| C | -2.12966700 | -0.03167700 | 0.01383000  |
| C | -2.38618900 | 0.51899300  | -1.24645800 |
| C | -3.18437700 | -0.51456800 | 0.79320300  |
| C | -3.69621700 | 0.56537500  | -1.72289800 |
| H | -1.56254000 | 0.89702200  | -1.83680300 |
| C | -4.49198500 | -0.44924100 | 0.31387300  |
| H | -2.96883100 | -0.93421000 | 1.76902900  |
| C | -4.75325100 | 0.08573300  | -0.94803800 |
| H | -3.89104500 | 0.98895100  | -2.70212300 |
| H | -5.30543100 | -0.82191100 | 0.92649300  |
| H | -5.76960600 | 0.13273900  | -1.32171700 |

**TS<sub>13</sub>**

|   |             |             |             |
|---|-------------|-------------|-------------|
| C | -0.44473700 | 0.93835500  | -0.56877900 |
| O | 1.04153600  | 0.37629800  | 0.79257800  |
| N | -1.44553400 | 1.11439300  | 0.55858300  |
| O | -0.64624200 | -0.02932500 | -1.28840200 |
| H | -2.36755300 | 1.29093100  | 0.08942000  |
| H | -1.56101600 | 0.18538800  | 1.02772400  |
| O | -2.22222100 | -2.25353800 | -0.86876700 |
| H | -1.91678400 | -3.04673400 | -1.32354200 |
| H | -1.59371700 | -1.53351000 | -1.09802200 |
| O | 0.56153800  | -1.33027900 | 2.80135600  |
| H | 1.19096100  | -2.05727800 | 2.75084300  |
| H | 0.79703200  | -0.70826000 | 2.05803300  |
| O | -1.98793100 | -1.35509600 | 1.82651400  |
| H | -1.12315900 | -1.56902300 | 2.23946800  |
| H | -2.08127600 | -1.94236000 | 1.05660200  |
| O | -4.69247400 | -1.07175800 | -1.35826400 |
| H | -3.88646100 | -1.60890200 | -1.20575700 |
| H | -5.40178900 | -1.51114300 | -0.87633400 |
| O | -3.98144800 | 1.46255600  | -0.58557400 |
| H | -4.31174300 | 0.58646700  | -0.89235400 |
| H | -4.11604200 | 2.07332700  | -1.31870600 |
| C | 0.20910700  | 2.19866000  | -1.05626400 |
| H | -0.53793900 | 2.77026800  | -1.61907000 |
| H | 0.60154700  | 2.81805700  | -0.25479100 |
| H | 1.01587400  | 1.92817200  | -1.73547300 |
| C | -1.21057700 | 2.16757600  | 1.58716800  |
| H | -1.28828000 | 3.15150500  | 1.13043500  |
| H | -1.98078900 | 2.06290900  | 2.34993800  |
| H | -0.22523400 | 2.01998700  | 2.01812700  |
| C | 2.19362900  | 0.07341300  | 0.19651900  |
| C | 2.39957900  | -1.18453800 | -0.41601000 |
| C | 3.26439000  | 0.99658400  | 0.16272700  |
| C | 3.61401700  | -1.49853300 | -1.02386500 |
| H | 1.59094800  | -1.90700300 | -0.39942600 |
| C | 4.47519200  | 0.67331300  | -0.44452500 |
| H | 3.12563200  | 1.96578300  | 0.63045800  |
| C | 4.66186200  | -0.57529900 | -1.04471100 |
| H | 3.74425300  | -2.47369100 | -1.48294300 |
| H | 5.28115300  | 1.40060600  | -0.44860700 |
| H | 5.60627800  | -0.82431100 | -1.51517600 |

**(AM<sup>+</sup>N...AL<sup>-</sup>)<sub>1</sub>**

|   |             |             |             |
|---|-------------|-------------|-------------|
| C | 0.71357200  | -0.93662400 | -0.65859800 |
| O | -1.28940400 | 0.30987100  | 0.72738600  |
| N | 1.43176600  | -0.97431400 | 0.65272500  |
| O | 1.03990500  | -0.06600600 | -1.42451400 |



|   |             |             |             |
|---|-------------|-------------|-------------|
| H | 2.39542200  | -1.36218200 | 0.44508000  |
| H | 1.60642200  | 0.02635200  | 0.94916800  |
| O | 3.08445400  | 1.92205300  | -1.22342300 |
| H | 3.06270400  | 2.66922600  | -1.83273100 |
| H | 2.34799000  | 1.33543800  | -1.47471900 |
| O | -0.45634500 | 2.57651900  | 1.64013100  |
| H | -0.72478200 | 3.30821700  | 1.07493500  |
| H | -0.84973300 | 1.73390700  | 1.22944500  |
| O | 2.05791800  | 1.60646300  | 1.43807600  |
| H | 1.20114200  | 2.09187400  | 1.52842500  |
| H | 2.49560000  | 1.98004700  | 0.65440500  |
| O | 5.29939700  | 0.24682700  | -0.93274500 |
| H | 4.60932100  | 0.92914700  | -1.06496500 |
| H | 5.99743900  | 0.66891900  | -0.41971600 |
| O | 3.99251200  | -1.86897000 | 0.19080600  |
| H | 4.53408700  | -1.15383900 | -0.21997000 |
| H | 4.14693100  | -2.66455900 | -0.33081700 |
| C | -0.18647100 | -2.08104600 | -0.97483400 |
| H | 0.39956600  | -3.00672100 | -0.98488000 |
| H | -0.97510400 | -2.18400600 | -0.23060900 |
| H | -0.62266600 | -1.92143000 | -1.95834300 |
| C | 0.82510100  | -1.73944800 | 1.78379000  |
| H | 0.78995100  | -2.79796900 | 1.53684700  |
| H | 1.46328100  | -1.59273800 | 2.65342200  |
| H | -0.16949700 | -1.33950000 | 1.96232000  |
| C | -2.50371300 | 0.17928600  | 0.24872800  |
| C | -3.04504900 | 1.08826400  | -0.70335900 |
| C | -3.35308100 | -0.88960600 | 0.64988300  |
| C | -4.33471500 | 0.93739000  | -1.20548600 |
| H | -2.42341500 | 1.91386700  | -1.03759400 |
| C | -4.63977500 | -1.03273900 | 0.13678600  |
| H | -2.97688400 | -1.59631500 | 1.38375500  |
| C | -5.14913900 | -0.12347600 | -0.79545300 |
| H | -4.70983500 | 1.65570100  | -1.92900600 |
| H | -5.25578900 | -1.86232500 | 0.47209300  |
| H | -6.15239200 | -0.23696400 | -1.19010300 |

**(AM<sup>+</sup>N...AL<sup>-</sup>)<sub>2</sub>**

|   |             |             |             |
|---|-------------|-------------|-------------|
| C | -1.44732400 | -0.96990300 | 1.07396400  |
| O | 1.80798100  | 0.26244200  | -0.06389200 |
| N | -1.70235500 | -0.91836400 | -0.39724400 |
| O | -2.25365800 | -0.40707600 | 1.76944600  |
| H | -2.67314700 | -1.30531900 | -0.56115100 |
| H | -1.78536400 | 0.12529900  | -0.64098200 |
| O | -3.98168500 | 1.78519100  | 1.01340300  |
| H | -4.23723000 | 2.44406600  | 1.66995200  |
| H | -3.51378900 | 1.08177100  | 1.49568300  |
| O | 0.59990000  | 2.50766900  | -0.40693800 |
| H | 0.76777100  | 3.08787100  | 0.34271500  |
| H | 1.13774500  | 1.65280900  | -0.24142200 |
| O | -1.89888800 | 1.70964900  | -0.95890300 |
| H | -1.02106800 | 2.10879100  | -0.71969700 |
| H | -2.56132600 | 2.05821900  | -0.33818700 |
| O | -5.85191600 | 0.33697700  | -0.48607600 |
| H | -5.28922300 | 0.95562600  | 0.02252200  |
| H | -6.18079400 | 0.83491100  | -1.24279000 |
| O | -4.23677100 | -1.81165300 | -0.97786600 |
| H | -4.88575300 | -1.08447800 | -0.82660200 |
| H | -4.59659400 | -2.59431300 | -0.54556800 |
| C | -0.21276200 | -1.65263900 | 1.52907400  |
| H | -0.16547300 | -2.67500900 | 1.14630000  |
| H | 0.64844900  | -1.10167500 | 1.11456200  |
| H | -0.18531200 | -1.65475800 | 2.61623400  |
| C | -0.72634800 | -1.56140000 | -1.32904400 |
| H | -0.70773000 | -2.63598200 | -1.16065800 |
| H | -1.07053600 | -1.36141600 | -2.34222300 |
| H | 0.25718800  | -1.12013300 | -1.17037800 |
| C | 3.11064200  | 0.12139800  | -0.06540200 |
| C | 4.00234100  | 1.23167100  | -0.03973900 |
| C | 3.71628300  | -1.16737700 | -0.08949700 |

|                        |             |             |             |
|------------------------|-------------|-------------|-------------|
| C                      | 5.38395600  | 1.05851900  | -0.03833800 |
| H                      | 3.58152500  | 2.23244800  | -0.02060100 |
| C                      | 5.09897300  | -1.32609900 | -0.08629100 |
| H                      | 3.06683400  | -2.03739900 | -0.11144400 |
| C                      | 5.95365800  | -0.21864300 | -0.06091600 |
| H                      | 6.02683600  | 1.93417800  | -0.01813600 |
| H                      | 5.51721100  | -2.32867000 | -0.10479300 |
| H                      | 7.03005600  | -0.34703200 | -0.05889400 |
| <b>TS<sub>14</sub></b> |             |             |             |
| C                      | -1.56428400 | -1.09808600 | 1.06431200  |
| O                      | 1.85776700  | 0.20553200  | -0.07039600 |
| N                      | -1.75783100 | -0.95988100 | -0.36289100 |
| O                      | -2.43066500 | -0.65197600 | 1.79104400  |
| H                      | -2.74898200 | -1.19699500 | -0.58990200 |
| H                      | -1.73489200 | 0.28043900  | -0.58778000 |
| O                      | -3.81649400 | 1.73405600  | 1.07672700  |
| H                      | -3.95357800 | 2.40897600  | 1.75241300  |
| H                      | -3.49804600 | 0.93601800  | 1.53871900  |
| O                      | 0.59343900  | 2.34909500  | -0.33842100 |
| H                      | 0.72075800  | 2.91703800  | 0.42885500  |
| H                      | 1.18789400  | 1.49253900  | -0.19891600 |
| O                      | -1.76444600 | 1.51358100  | -0.79534000 |
| H                      | -0.84243800 | 1.91830800  | -0.57691600 |
| H                      | -2.43717500 | 1.87745100  | -0.18223000 |
| O                      | -5.87103800 | 0.69522200  | -0.53802200 |
| H                      | -5.24650000 | 1.19855100  | 0.02046300  |
| H                      | -6.13506400 | 1.29209200  | -1.24698000 |
| O                      | -4.40008100 | -1.54212300 | -1.18303600 |
| H                      | -4.99976800 | -0.78607800 | -0.99270200 |
| H                      | -4.84744900 | -2.32899600 | -0.85270000 |
| C                      | -0.28740800 | -1.70102200 | 1.54158900  |
| H                      | -0.18296800 | -2.72368300 | 1.16890100  |
| H                      | 0.55696100  | -1.12086300 | 1.14143100  |
| H                      | -0.27592300 | -1.70019500 | 2.62916300  |
| C                      | -0.82609200 | -1.64367100 | -1.30052500 |
| H                      | -0.86657300 | -2.72490400 | -1.16957500 |
| H                      | -1.14382200 | -1.39590300 | -2.31236600 |
| H                      | 0.18570700  | -1.27402200 | -1.13757300 |
| C                      | 3.16784300  | 0.11800900  | -0.08058300 |
| C                      | 4.01346100  | 1.26215000  | -0.07237900 |
| C                      | 3.81902400  | -1.14636900 | -0.09804700 |
| C                      | 5.40086400  | 1.14210300  | -0.08088800 |
| H                      | 3.55540600  | 2.24643800  | -0.05969000 |
| C                      | 5.20673400  | -1.25207900 | -0.10513500 |
| H                      | 3.20238300  | -2.04004700 | -0.10711300 |
| C                      | 6.01816300  | -0.11242800 | -0.09675500 |
| H                      | 6.00962300  | 2.04185600  | -0.07420200 |
| H                      | 5.66294600  | -2.23789400 | -0.11840700 |
| H                      | 7.09862800  | -0.19969200 | -0.10263600 |

**Table S3.** Cartesian coordinates of stationary points for the reaction of methyammine with *p*-nitrophenyl acetate in water. Optimized geometries at the B3LYP/6-311+G(d,p) level.

|           |             |             |             |
|-----------|-------------|-------------|-------------|
| <b>RC</b> |             |             |             |
| C         | 0.87327200  | -2.79783500 | -0.52613600 |
| O         | 2.09224800  | -2.41739100 | -0.97162100 |
| N         | -5.66790900 | 3.03017600  | -1.31417100 |
| O         | 0.16286100  | -2.06913200 | 0.13988100  |
| H         | -5.38305800 | 2.21830000  | -0.76606700 |
| H         | -4.84680600 | 3.62018500  | -1.40929300 |
| O         | -2.41614700 | -2.65256400 | 1.20702100  |
| H         | -2.40684500 | -3.45126300 | 1.74761700  |
| H         | -1.51459300 | -2.56006800 | 0.84277000  |
| O         | -4.48304800 | -2.15423900 | -0.65496100 |
| H         | -3.78989300 | -2.45085900 | -0.03321700 |
| H         | -5.15977000 | -2.83955200 | -0.63838600 |
| O         | -0.27942600 | 0.65020700  | 1.16395200  |

|   |             |             |             |
|---|-------------|-------------|-------------|
| H | 0.03997500  | -0.19244600 | 0.80124600  |
| H | 0.42119900  | 0.96168900  | 1.74783400  |
| O | -2.83960300 | 0.02829800  | 2.19299700  |
| H | -2.77366400 | -0.93029300 | 2.03707300  |
| H | -1.96987500 | 0.36326400  | 1.89981300  |
| O | -4.95116100 | 0.49130700  | 0.35133300  |
| H | -4.23508000 | 0.46102800  | 1.01602500  |
| H | -4.90823900 | -0.38737600 | -0.06800600 |
| C | 0.55209400  | -4.19671400 | -0.94498300 |
| H | -0.49755500 | -4.41189700 | -0.76039300 |
| H | 0.79108000  | -4.33883700 | -1.99934000 |
| H | 1.17199200  | -4.88742700 | -0.36688700 |
| C | -6.73295300 | 3.76436400  | -0.61722800 |
| H | -7.61092300 | 3.12096900  | -0.51681900 |
| H | -6.46083000 | 4.11856900  | 0.38769000  |
| H | -7.03174400 | 4.63417100  | -1.20831200 |
| C | 2.59203200  | -1.15318500 | -0.64433200 |
| C | 3.27886200  | -0.98591100 | 0.55388600  |
| C | 2.46488900  | -0.12889400 | -1.57613000 |
| C | 3.84773000  | 0.24942900  | 0.83555000  |
| H | 3.37157000  | -1.81002600 | 1.24913000  |
| C | 3.03432900  | 1.10738800  | -1.29910600 |
| H | 1.93275000  | -0.30072700 | -2.50261800 |
| C | 3.71452500  | 1.27679100  | -0.09572200 |
| H | 4.38877500  | 0.41512600  | 1.75601400  |
| H | 2.95491200  | 1.92554900  | -2.00034100 |
| N | 4.31976600  | 2.58501800  | 0.19926000  |
| O | 4.21658500  | 3.47278300  | -0.64175800 |
| O | 4.89830800  | 2.72610300  | 1.27241200  |

**TS (RC-T<sub>1</sub><sup>±</sup>)**

|   |             |             |             |
|---|-------------|-------------|-------------|
| C | -1.10968000 | 0.93002100  | -0.83525900 |
| O | 0.11789000  | 1.63237800  | -0.86676500 |
| N | -1.67581800 | 1.49701900  | 1.01896300  |
| O | -1.10172900 | -0.31368100 | -0.75984800 |
| H | -2.54554200 | 0.98517700  | 1.21677700  |
| H | -0.94645500 | 1.07222600  | 1.58712500  |
| O | -3.22683300 | -1.93841800 | -1.35482300 |
| H | -3.07150700 | -2.46930000 | -2.14401200 |
| H | -2.44436000 | -1.34705400 | -1.25208900 |
| O | -5.43895700 | -0.30759200 | -0.86375700 |
| H | -4.76515000 | -0.94618900 | -1.17447500 |
| H | -6.28913600 | -0.74892300 | -0.96594900 |
| O | -0.39599600 | -1.93807000 | 1.38611200  |
| H | -0.46640200 | -1.38143900 | 0.58407300  |
| H | 0.33695000  | -2.54264500 | 1.22720200  |
| O | -3.11810500 | -2.65609600 | 1.43913400  |
| H | -3.24668700 | -2.65394200 | 0.47417600  |
| H | -2.15358100 | -2.53022200 | 1.53956000  |
| O | -4.19414500 | -0.02182000 | 1.68089200  |
| H | -3.85291600 | -0.93711900 | 1.73691000  |
| H | -4.74499300 | -0.03059900 | 0.87515900  |
| C | -2.12569800 | 1.68883800  | -1.64933800 |
| H | -3.13074300 | 1.35097900  | -1.39999300 |
| H | -2.04416000 | 2.76356500  | -1.49698500 |
| H | -1.93347200 | 1.47251900  | -2.70453700 |
| C | -1.81440200 | 2.92592900  | 1.34072700  |
| H | -2.67511300 | 3.33361300  | 0.81028600  |
| H | -1.95798700 | 3.09072700  | 2.41261300  |
| H | -0.91935200 | 3.46077700  | 1.01986500  |
| C | 1.30592500  | 0.99556600  | -0.59587000 |
| C | 1.74258000  | -0.10172400 | -1.34661500 |
| C | 2.11757700  | 1.55105000  | 0.39665600  |
| C | 2.98763400  | -0.65468600 | -1.08787700 |
| H | 1.11508400  | -0.50999400 | -2.12549600 |
| C | 3.36682900  | 1.00569200  | 0.65500200  |
| H | 1.76609800  | 2.40939800  | 0.95436300  |
| C | 3.78453400  | -0.09679700 | -0.08800800 |
| H | 3.34615000  | -1.50084000 | -1.65660500 |
| H | 4.00781000  | 1.42174800  | 1.41907700  |

|   |            |             |             |
|---|------------|-------------|-------------|
| N | 5.09985700 | -0.67992600 | 0.18189100  |
| O | 5.80330600 | -0.15792200 | 1.04482600  |
| O | 5.44399600 | -1.66696000 | -0.46571000 |

**T<sub>1</sub><sup>‡</sup>**

|   |             |             |             |
|---|-------------|-------------|-------------|
| C | 1.02980800  | 0.68422500  | 0.31228900  |
| O | -0.23408500 | 1.36232100  | -0.13797200 |
| N | 2.03759400  | 1.70208400  | -0.36608500 |
| O | 1.21252300  | -0.48504900 | -0.20503900 |
| H | 2.99669300  | 1.29059900  | -0.25984600 |
| H | 1.81358600  | 1.64381500  | -1.36127800 |
| O | 2.89999200  | -2.33926100 | 0.71749300  |
| H | 2.44194300  | -3.13833100 | 1.00026500  |
| H | 2.20061200  | -1.68191000 | 0.45229200  |
| O | 4.67083900  | -0.81106500 | 2.20481200  |
| H | 4.07989100  | -1.49020100 | 1.81576700  |
| H | 5.44897500  | -1.28285700 | 2.52104500  |
| O | 1.86394600  | -0.89933900 | -2.78750800 |
| H | 1.48466900  | -0.76672200 | -1.88298400 |
| H | 1.24359100  | -1.46020600 | -3.26502300 |
| O | 4.32430300  | -1.69724900 | -1.70127400 |
| H | 3.95321900  | -2.15957200 | -0.92828900 |
| H | 3.53483300  | -1.49051500 | -2.24202700 |
| O | 4.64947900  | 0.66666200  | -0.18684400 |
| H | 4.64452000  | -0.09883800 | -0.80112600 |
| H | 4.79451600  | 0.26029200  | 0.69164900  |
| C | 1.13930700  | 0.80946300  | 1.82972000  |
| H | 2.14943400  | 0.54254200  | 2.14641900  |
| H | 0.90060900  | 1.81186700  | 2.18439900  |
| H | 0.44366600  | 0.10566300  | 2.28665400  |
| C | 2.04727300  | 3.13019200  | 0.05852400  |
| H | 2.41412400  | 3.19754900  | 1.07958500  |
| H | 2.71639900  | 3.68045300  | -0.60165600 |
| H | 1.04042000  | 3.53312600  | -0.01088300 |
| C | -1.44190100 | 0.77495200  | -0.04699100 |
| C | -1.68481600 | -0.52695200 | 0.42958400  |
| C | -2.52397900 | 1.57097100  | -0.47439800 |
| C | -2.98359000 | -1.00767800 | 0.48316700  |
| H | -0.86510100 | -1.15939600 | 0.73146200  |
| C | -3.81657100 | 1.08981500  | -0.42241800 |
| H | -2.32127100 | 2.56905000  | -0.84165000 |
| C | -4.04259400 | -0.20359900 | 0.06018100  |
| H | -3.17960600 | -2.00643000 | 0.84758800  |
| H | -4.64757400 | 1.69994500  | -0.74714700 |
| N | -5.39840800 | -0.71696300 | 0.11972300  |
| O | -6.31987700 | 0.00853700  | -0.26278200 |
| O | -5.57962900 | -1.85856800 | 0.55053400  |

**T<sub>2</sub><sup>‡</sup>**

|   |             |             |             |
|---|-------------|-------------|-------------|
| C | -1.03136000 | 0.68995700  | -0.30915400 |
| O | 0.23337600  | 1.36597000  | 0.14282300  |
| N | -2.03808400 | 1.70392800  | 0.37652300  |
| O | -1.21308100 | -0.48212800 | 0.20174800  |
| H | -2.99716000 | 1.29149900  | 0.27226800  |
| H | -1.81009700 | 1.64251200  | 1.37055100  |
| O | -2.89546400 | -2.33386000 | -0.73777700 |
| H | -2.43709100 | -3.12905600 | -1.03081500 |
| H | -2.19658300 | -1.67863500 | -0.46677200 |
| O | -4.68061200 | -0.79681200 | -2.19887200 |
| H | -4.08507300 | -1.47713900 | -1.81906400 |
| H | -5.46047500 | -1.26825800 | -2.51133900 |
| O | -1.84889400 | -0.93755900 | 2.78152500  |
| H | -1.47599300 | -0.78490700 | 1.87749000  |
| H | -1.22564500 | -1.50974000 | 3.24151200  |
| O | -4.31399200 | -1.71354600 | 1.69025700  |
| H | -3.94665600 | -2.16861400 | 0.91127600  |
| H | -3.52246400 | -1.51751600 | 2.23201300  |
| O | -4.64827200 | 0.66546700  | 0.20260700  |
| H | -4.63561400 | -0.10533600 | 0.81022100  |
| H | -4.79611100 | 0.26622100  | -0.67863200 |

|   |             |             |             |
|---|-------------|-------------|-------------|
| C | -1.14297800 | 0.82379200  | -1.82571500 |
| H | -2.15378700 | 0.55938700  | -2.14240400 |
| H | -0.90412900 | 1.82796200  | -2.17522500 |
| H | -0.44849800 | 0.12205500  | -2.28754500 |
| C | -2.05111300 | 3.13358000  | -0.04264400 |
| H | -2.42066600 | 3.20424000  | -1.06250200 |
| H | -2.71943900 | 3.68030400  | 0.62128500  |
| H | -1.04473600 | 3.53793000  | 0.02572400  |
| C | 1.44061400  | 0.77799300  | 0.04929100  |
| C | 1.68278200  | -0.52121600 | -0.43512200 |
| C | 2.52327400  | 1.57037400  | 0.48213000  |
| C | 2.98109700  | -1.00281600 | -0.49076300 |
| H | 0.86280800  | -1.15114000 | -0.74144300 |
| C | 3.81543900  | 1.08836800  | 0.42798200  |
| H | 2.32125500  | 2.56641600  | 0.85525700  |
| C | 4.04061400  | -0.20234000 | -0.06224300 |
| H | 3.17640000  | -1.99950100 | -0.86116300 |
| H | 4.64683800  | 1.69575100  | 0.75684100  |
| N | 5.39591800  | -0.71662800 | -0.12410100 |
| O | 6.31783800  | 0.00540100  | 0.26391000  |
| O | 5.57633600  | -1.85564300 | -0.56210400 |

**TS<sub>15</sub>**

|   |             |             |             |
|---|-------------|-------------|-------------|
| C | -1.13012100 | 0.73226600  | -0.27709900 |
| O | 0.25841700  | 1.41932900  | 0.14829100  |
| N | -2.09404100 | 1.66457500  | 0.31096800  |
| O | -1.21816800 | -0.46597900 | 0.25896500  |
| H | -3.69516800 | 0.97499700  | 0.23775000  |
| H | -1.94394500 | 1.63553000  | 1.31720000  |
| O | -2.81427800 | -2.32120300 | -0.65282200 |
| H | -2.38373800 | -3.15540600 | -0.87103900 |
| H | -2.09604100 | -1.65216700 | -0.41800100 |
| O | -4.67147700 | -0.81690200 | -2.12814500 |
| H | -4.05734800 | -1.50914900 | -1.81175800 |
| H | -5.44716500 | -1.27732600 | -2.46721800 |
| O | -1.98217600 | -0.87446400 | 2.70970500  |
| H | -1.53418600 | -0.68816200 | 1.82340700  |
| H | -1.43185000 | -1.50069600 | 3.19290900  |
| O | -4.14636000 | -1.55972200 | 1.51957700  |
| H | -3.75346400 | -2.10453500 | 0.78232300  |
| H | -3.35337700 | -1.35968000 | 2.13337300  |
| O | -4.59130000 | 0.50658200  | 0.27826300  |
| H | -4.39953400 | -0.60370200 | 1.00919200  |
| H | -4.77081900 | 0.18287700  | -0.63479800 |
| C | -1.13968000 | 0.78128400  | -1.80395500 |
| H | -2.13168100 | 0.49808000  | -2.16299000 |
| H | -0.89504800 | 1.77122200  | -2.18842500 |
| H | -0.41674500 | 0.06654800  | -2.19539600 |
| C | -2.09404300 | 3.06886200  | -0.14014100 |
| H | -2.47222400 | 3.13422700  | -1.16070100 |
| H | -2.77232100 | 3.63149100  | 0.50322500  |
| H | -1.10289800 | 3.52816200  | -0.09534000 |
| C | 1.44238500  | 0.82766900  | 0.06285800  |
| C | 1.67445600  | -0.49508600 | -0.38544700 |
| C | 2.55545300  | 1.61198100  | 0.45949400  |
| C | 2.96292700  | -0.99410700 | -0.44391900 |
| H | 0.84034000  | -1.12163500 | -0.65817400 |
| C | 3.83812000  | 1.11198500  | 0.40184000  |
| H | 2.37400000  | 2.62168600  | 0.80675600  |
| C | 4.04459200  | -0.19735600 | -0.05459300 |
| H | 3.14032600  | -2.00419600 | -0.78690800 |
| H | 4.68204700  | 1.71768400  | 0.70151600  |
| N | 5.38355500  | -0.72739500 | -0.12089800 |
| O | 6.32570000  | -0.00861700 | 0.23431400  |
| O | 5.54835600  | -1.88291100 | -0.53084800 |

**T<sup>-</sup>...H<sub>3</sub>O<sup>+</sup>**

|   |             |            |             |
|---|-------------|------------|-------------|
| C | -1.13012100 | 0.73226600 | -0.27709900 |
| O | 0.25841700  | 1.41933000 | 0.14829000  |
| N | -2.09404100 | 1.66457500 | 0.31096800  |

|   |             |             |             |
|---|-------------|-------------|-------------|
| O | -1.21816800 | -0.46597900 | 0.25896400  |
| H | -3.69516800 | 0.97499600  | 0.23774900  |
| H | -1.94394500 | 1.63553100  | 1.31720000  |
| O | -2.81427700 | -2.32120300 | -0.65282200 |
| H | -2.38373800 | -3.15540600 | -0.87103800 |
| H | -2.09604100 | -1.65216700 | -0.41800100 |
| O | -4.67147700 | -0.81690200 | -2.12814500 |
| H | -4.05734700 | -1.50914900 | -1.81175800 |
| H | -5.44716500 | -1.27732600 | -2.46721800 |
| O | -1.98217600 | -0.87446400 | 2.70970500  |
| H | -1.53418600 | -0.68816100 | 1.82340700  |
| H | -1.43185000 | -1.50069500 | 3.19290900  |
| O | -4.14636000 | -1.55972200 | 1.51957700  |
| H | -3.75346400 | -2.10453500 | 0.78232200  |
| H | -3.35337700 | -1.35968000 | 2.13337200  |
| O | -4.59130000 | 0.50658200  | 0.27826300  |
| H | -4.39953300 | -0.60370200 | 1.00919200  |
| H | -4.77081900 | 0.18287700  | -0.63479800 |
| C | -1.13968000 | 0.78128400  | -1.80395500 |
| H | -2.13168100 | 0.49808000  | -2.16299000 |
| H | -0.89504800 | 1.77122200  | -2.18842500 |
| H | -0.41674600 | 0.06654700  | -2.19539600 |
| C | -2.09404400 | 3.06886300  | -0.14014100 |
| H | -2.47222500 | 3.13422700  | -1.16070200 |
| H | -2.77232100 | 3.63149200  | 0.50322500  |
| H | -1.10289800 | 3.52816200  | -0.09534100 |
| C | 1.44238500  | 0.82766900  | 0.06285700  |
| C | 1.67445700  | -0.49508600 | -0.38544700 |
| C | 2.55545300  | 1.61198100  | 0.45949400  |
| C | 2.96292700  | -0.99410700 | -0.44392000 |
| H | 0.84034100  | -1.12163500 | -0.65817400 |
| C | 3.83811900  | 1.11198500  | 0.40183900  |
| H | 2.37400000  | 2.62168700  | 0.80675600  |
| C | 4.04459100  | -0.19735700 | -0.05459300 |
| H | 3.14032500  | -2.00419700 | -0.78690700 |
| H | 4.68204700  | 1.71768400  | 0.70151500  |
| N | 5.38355500  | -0.72739500 | -0.12089800 |
| O | 6.32570000  | -0.00861700 | 0.23431300  |
| O | 5.54835600  | -1.88291100 | -0.53084800 |

**TS<sub>16</sub>**

|   |             |             |             |
|---|-------------|-------------|-------------|
| C | -1.16693400 | 0.73991700  | -0.28203800 |
| O | 0.29088200  | 1.45052500  | 0.13701300  |
| N | -2.09247300 | 1.67200300  | 0.33374500  |
| O | -1.22485100 | -0.45394700 | 0.24297200  |
| H | -3.74892100 | 0.97414400  | 0.26866000  |
| H | -1.94144400 | 1.62293600  | 1.33844400  |
| O | -2.82341400 | -2.32853400 | -0.67065300 |
| H | -2.40204700 | -3.16562800 | -0.89648300 |
| H | -2.09977600 | -1.66781500 | -0.44752100 |
| O | -4.69999200 | -0.79771300 | -2.12343000 |
| H | -4.08383800 | -1.49360600 | -1.82250400 |
| H | -5.47218700 | -1.25480900 | -2.47479400 |
| O | -1.98587000 | -0.91775100 | 2.68886100  |
| H | -1.53506500 | -0.70891000 | 1.81075400  |
| H | -1.43260500 | -1.54734800 | 3.16462400  |
| O | -4.13529800 | -1.60532800 | 1.51291200  |
| H | -3.74416400 | -2.12730900 | 0.75480700  |
| H | -3.33112700 | -1.40002400 | 2.12164800  |
| O | -4.63287700 | 0.50182200  | 0.30800600  |
| H | -4.41257300 | -0.66841300 | 1.04583000  |
| H | -4.80916800 | 0.18963000  | -0.60835400 |
| C | -1.16747000 | 0.81610300  | -1.80441800 |
| H | -2.15942600 | 0.54035500  | -2.17121000 |
| H | -0.92076800 | 1.81165100  | -2.17132000 |
| H | -0.44453300 | 0.10592000  | -2.20354300 |
| C | -2.09665800 | 3.08034900  | -0.10085500 |
| H | -2.49343300 | 3.15875600  | -1.11338000 |
| H | -2.76197500 | 3.63638700  | 0.56127200  |
| H | -1.10346200 | 3.53569300  | -0.06851300 |

|   |            |             |             |
|---|------------|-------------|-------------|
| C | 1.46457400 | 0.85615900  | 0.05809500  |
| C | 1.68885200 | -0.46772200 | -0.40224600 |
| C | 2.59033900 | 1.62183600  | 0.46807400  |
| C | 2.97044100 | -0.98091200 | -0.45869300 |
| H | 0.84966300 | -1.08230300 | -0.68722900 |
| C | 3.86626600 | 1.10741400  | 0.41117100  |
| H | 2.41991400 | 2.63048100  | 0.82435700  |
| C | 4.06154900 | -0.20102000 | -0.05660000 |
| H | 3.13812100 | -1.98965500 | -0.81074400 |
| H | 4.71600300 | 1.70023800  | 0.72045300  |
| N | 5.39113600 | -0.74451100 | -0.12169500 |
| O | 6.34222600 | -0.04027800 | 0.24371500  |
| O | 5.54624700 | -1.89949100 | -0.54121500 |

**AM...H<sub>3</sub>O<sup>+</sup>...AL<sup>-</sup>**

|   |             |             |             |
|---|-------------|-------------|-------------|
| C | -1.16693400 | 0.73991700  | -0.28203800 |
| O | 0.29088200  | 1.45052500  | 0.13701300  |
| N | -2.09247300 | 1.67200300  | 0.33374500  |
| O | -1.22485100 | -0.45394700 | 0.24297200  |
| H | -3.74892100 | 0.97414400  | 0.26866000  |
| H | -1.94144400 | 1.62293600  | 1.33844400  |
| O | -2.82341400 | -2.32853400 | -0.67065300 |
| H | -2.40204700 | -3.16562800 | -0.89648300 |
| H | -2.09977600 | -1.66781500 | -0.44752100 |
| O | -4.69999200 | -0.79771300 | -2.12343000 |
| H | -4.08383800 | -1.49360600 | -1.82250400 |
| H | -5.47218700 | -1.25480900 | -2.47479400 |
| O | -1.98587000 | -0.91775100 | 2.68886100  |
| H | -1.53506500 | -0.70891000 | 1.81075400  |
| H | -1.43260500 | -1.54734800 | 3.16462400  |
| O | -4.13529800 | -1.60532800 | 1.51291200  |
| H | -3.74416400 | -2.12730900 | 0.75480700  |
| H | -3.33112700 | -1.40002400 | 2.12164800  |
| O | -4.63287700 | 0.50182200  | 0.30800600  |
| H | -4.41257300 | -0.66841300 | 1.04583000  |
| H | -4.80916800 | 0.18963000  | -0.60835400 |
| C | -1.16747000 | 0.81610300  | -1.80441800 |
| H | -2.15942600 | 0.54035500  | -2.17121000 |
| H | -0.92076800 | 1.81165100  | -2.17132000 |
| H | -0.44453300 | 0.10592000  | -2.20354300 |
| C | -2.09665800 | 3.08034900  | -0.10085500 |
| H | -2.49343300 | 3.15875600  | -1.11338000 |
| H | -2.76197500 | 3.63638700  | 0.56127200  |
| H | -1.10346200 | 3.53569300  | -0.06851300 |
| C | 1.46457400  | 0.85615900  | 0.05809500  |
| C | 1.68885200  | -0.46772200 | -0.40224600 |
| C | 2.59033900  | 1.62183600  | 0.46807400  |
| C | 2.97044100  | -0.98091200 | -0.45869300 |
| H | 0.84966300  | -1.08230300 | -0.68722900 |
| C | 3.86626600  | 1.10741400  | 0.41117100  |
| H | 2.41991400  | 2.63048100  | 0.82435700  |
| C | 4.06154900  | -0.20102000 | -0.05660000 |
| H | 3.13812100  | -1.98965500 | -0.81074400 |
| H | 4.71600300  | 1.70023800  | 0.72045300  |
| N | 5.39113600  | -0.74451100 | -0.12169500 |
| O | 6.34222600  | -0.04027800 | 0.24371500  |
| O | 5.54624700  | -1.89949100 | -0.54121500 |

**(AM...AL)<sub>1</sub>**

|   |             |             |             |
|---|-------------|-------------|-------------|
| C | -2.88594700 | -1.45405700 | 1.22897200  |
| O | 0.70817600  | 0.38637200  | 1.59155000  |
| N | -2.64382100 | -2.06565300 | 0.06102600  |
| O | -3.72958300 | -0.53792300 | 1.33080300  |
| H | -3.20224400 | -1.78714300 | -0.74864000 |
| H | -2.27281900 | 3.63863100  | -0.96805800 |
| O | -4.55031600 | 1.57663500  | -0.07245900 |
| H | -5.31487100 | 1.90857300  | 0.41333500  |
| H | -4.26598400 | 0.74863500  | 0.39683100  |
| O | -0.30471000 | 2.84313200  | 1.51145000  |
| H | -0.45892700 | 3.27588300  | 2.35833300  |

|   |             |             |             |
|---|-------------|-------------|-------------|
| H | 0.33118000  | 1.30655100  | 1.54946800  |
| O | -2.45887800 | 3.40687000  | -0.05161000 |
| H | -1.09462900 | 3.03399100  | 0.95191900  |
| H | -3.20160300 | 2.76536200  | -0.07844800 |
| O | -5.07547500 | 0.87375400  | -2.70492800 |
| H | -4.91499500 | 1.21400200  | -1.79878300 |
| H | -4.67768900 | 1.51436200  | -3.30457800 |
| O | -3.97378700 | -1.64952500 | -2.52641700 |
| H | -4.39144200 | -0.77344300 | -2.67548900 |
| H | -4.63233500 | -2.30114200 | -2.78980900 |
| C | -2.08933200 | -1.89328300 | 2.43459600  |
| H | -2.07349900 | -2.97990700 | 2.53997800  |
| H | -1.05510600 | -1.55035800 | 2.33388200  |
| H | -2.52232300 | -1.44558500 | 3.32671600  |
| C | -1.67519300 | -3.13678600 | -0.15559300 |
| H | -1.95625100 | -4.05322000 | 0.37053300  |
| H | -1.64772500 | -3.34972100 | -1.22313300 |
| H | -0.67267400 | -2.84127900 | 0.16043400  |
| C | 1.88378500  | 0.29078200  | 0.95720300  |
| C | 2.52384100  | -0.96258700 | 0.95132300  |
| C | 2.48755100  | 1.38551000  | 0.30897400  |
| C | 3.73793600  | -1.12245000 | 0.31205400  |
| H | 2.05005900  | -1.79608300 | 1.45453900  |
| C | 3.70359900  | 1.22663100  | -0.33102500 |
| H | 1.99325600  | 2.34880500  | 0.31703000  |
| C | 4.32519900  | -0.02548900 | -0.32846800 |
| H | 4.23584100  | -2.08186900 | 0.30288300  |
| H | 4.17532900  | 2.06043500  | -0.83184400 |
| N | 5.59885800  | -0.18979500 | -0.99996200 |
| O | 6.10471100  | 0.78908300  | -1.55610400 |
| O | 6.13180800  | -1.30301900 | -0.99138000 |

**T<sub>3</sub><sup>±</sup>**

|   |             |             |             |
|---|-------------|-------------|-------------|
| C | -0.93384300 | 0.68561900  | -0.58551100 |
| O | 0.27964500  | 1.31575400  | 0.05125100  |
| N | -2.02237200 | 1.64454300  | 0.06452500  |
| O | -1.16143600 | -0.52086600 | -0.19445000 |
| H | -2.93409600 | 1.36291900  | -0.34878800 |
| O | -2.08659700 | -0.18453300 | 2.38650600  |
| H | -1.69741800 | -0.54857100 | 1.56325800  |
| H | -2.97411200 | -0.58881800 | 2.44507200  |
| O | -4.67892000 | -1.34428600 | 2.35153200  |
| H | -4.84989800 | -1.56375600 | 1.41233500  |
| H | -4.82593400 | -2.16034200 | 2.84183500  |
| O | -2.56545400 | -2.44448100 | -1.37691400 |
| H | -1.98320800 | -1.73501200 | -0.99169400 |
| H | -2.15943200 | -3.28557000 | -1.14129800 |
| O | -4.95959200 | -1.73049400 | -0.40329600 |
| H | -5.69266400 | -2.22856100 | -0.78265500 |
| H | -4.12412900 | -2.11294100 | -0.78026200 |
| O | -4.57407000 | 0.95696100  | -1.03230500 |
| H | -4.82875700 | 0.03171500  | -0.82975800 |
| H | -5.31498000 | 1.50424400  | -0.74923600 |
| C | -0.88487900 | 0.95296400  | -2.08839700 |
| H | -1.84640000 | 0.68655800  | -2.53148500 |
| H | -0.65430400 | 1.99272100  | -2.32158400 |
| H | -0.11760900 | 0.31984900  | -2.53402500 |
| C | -1.87528900 | 3.12266600  | -0.02838400 |
| H | -1.92198600 | 3.42841600  | -1.07112000 |
| H | -2.69768200 | 3.58423500  | 0.51771400  |
| H | -0.92589900 | 3.41813600  | 0.40794200  |
| H | -2.06287600 | 1.34114100  | 1.04977500  |
| C | 1.48808900  | 0.72833700  | 0.03141700  |
| C | 1.77993500  | -0.52631300 | -0.53806800 |
| C | 2.52322900  | 1.47071400  | 0.63725300  |
| C | 3.07780600  | -1.01049500 | -0.50882700 |
| H | 0.99434100  | -1.12071400 | -0.97684100 |
| C | 3.81498300  | 0.98608000  | 0.66730600  |
| H | 2.28471700  | 2.43178000  | 1.07503100  |
| C | 4.08983900  | -0.25827200 | 0.08938900  |



|   |            |             |             |
|---|------------|-------------|-------------|
| H | 3.30979600 | -1.97224100 | -0.94474200 |
| H | 4.60922400 | 1.55666900  | 1.12770100  |
| N | 5.44477400 | -0.77372700 | 0.11432000  |
| O | 6.32387800 | -0.09471600 | 0.65181400  |
| O | 5.66970500 | -1.87151200 | -0.40240700 |

**TS<sub>17</sub>**

|   |             |             |             |
|---|-------------|-------------|-------------|
| C | -0.92306100 | 0.58723600  | -0.50033200 |
| O | 0.27141100  | 1.24511800  | 0.03125800  |
| N | -2.00643700 | 1.55210000  | -0.07039400 |
| O | -1.16336700 | -0.60332700 | 0.11592200  |
| H | -2.86020100 | 1.28891800  | -0.58765600 |
| O | -2.17972500 | 0.34815200  | 2.07791100  |
| H | -1.61263100 | -0.34545300 | 1.13980900  |
| H | -3.07377200 | -0.00040700 | 2.24731100  |
| O | -4.86627200 | -0.73318400 | 2.31865300  |
| H | -5.01326400 | -1.14807300 | 1.44484100  |
| H | -5.05453400 | -1.42000200 | 2.96725500  |
| O | -2.60711600 | -2.71286200 | -0.87477700 |
| H | -2.01664300 | -1.98991900 | -0.56138400 |
| H | -2.28991300 | -3.51917200 | -0.45331300 |
| O | -5.04881400 | -1.69903300 | -0.31013200 |
| H | -5.77996400 | -2.24305500 | -0.62447700 |
| H | -4.21492900 | -2.18725300 | -0.52414400 |
| O | -4.50280700 | 0.81291100  | -1.42898400 |
| H | -4.81594600 | -0.04385400 | -1.07280800 |
| H | -5.24251200 | 1.42293600  | -1.33365200 |
| C | -0.83379200 | 0.46753300  | -2.01497700 |
| H | -1.78389000 | 0.09559500  | -2.40091800 |
| H | -0.61747000 | 1.43470700  | -2.46975900 |
| H | -0.04846800 | -0.23339200 | -2.29595000 |
| C | -1.77328200 | 3.00459100  | -0.23913900 |
| H | -1.50724300 | 3.25189300  | -1.26820700 |
| H | -2.69934900 | 3.51887100  | 0.01831600  |
| H | -0.98196000 | 3.33243300  | 0.42931400  |
| H | -2.21299100 | 1.16948200  | 1.08972600  |
| C | 1.49948300  | 0.67760800  | 0.02614500  |
| C | 1.77970500  | -0.66846100 | -0.26403500 |
| C | 2.54898500  | 1.55252200  | 0.36390900  |
| C | 3.09143100  | -1.11764400 | -0.23211600 |
| H | 0.98190300  | -1.35816200 | -0.48841400 |
| C | 3.85398600  | 1.10271400  | 0.40153400  |
| H | 2.31398800  | 2.58485300  | 0.58950900  |
| C | 4.11990900  | -0.23573300 | 0.09728500  |
| H | 3.31851500  | -2.15085500 | -0.45463700 |
| H | 4.66327600  | 1.77214700  | 0.65652500  |
| N | 5.49152700  | -0.71647100 | 0.12910300  |
| O | 6.38460300  | 0.07650900  | 0.43399100  |
| O | 5.70861000  | -1.89726500 | -0.14982900 |

**T<sub>1</sub><sup>0</sup>**

|   |             |             |             |
|---|-------------|-------------|-------------|
| C | -0.87302600 | 0.74852700  | -0.51896300 |
| O | 0.30376300  | 1.23706300  | 0.19321000  |
| N | -1.92148000 | 1.64316700  | -0.05385600 |
| O | -1.19382600 | -0.55335400 | -0.11263400 |
| H | -2.80280900 | 1.33610000  | -0.47271200 |
| O | -2.25768400 | 0.04043500  | 2.33958800  |
| H | -1.52191100 | -0.51145500 | 0.82104600  |
| H | -3.16981400 | -0.31523400 | 2.39560300  |
| O | -4.83518600 | -1.04236600 | 2.33894700  |
| H | -5.01013600 | -1.35760500 | 1.42789700  |
| H | -5.00952300 | -1.79363400 | 2.91634400  |
| O | -2.74983700 | -2.53421500 | -1.33988600 |
| H | -2.12485500 | -1.87154400 | -0.98292800 |
| H | -2.37556600 | -3.39594900 | -1.12525500 |
| O | -5.13836500 | -1.69775700 | -0.35506600 |
| H | -5.88936700 | -2.20629600 | -0.68185300 |
| H | -4.32507400 | -2.12171800 | -0.72207600 |
| O | -4.69774600 | 0.96980300  | -1.17907600 |
| H | -4.97306800 | 0.07270400  | -0.90686600 |

|   |             |             |             |
|---|-------------|-------------|-------------|
| H | -5.39977200 | 1.55679900  | -0.87826900 |
| C | -0.62650400 | 0.74440300  | -2.02497400 |
| H | -1.55124200 | 0.46627600  | -2.53308300 |
| H | -0.32370800 | 1.73583600  | -2.36109100 |
| H | 0.14873600  | 0.03118700  | -2.30334300 |
| C | -1.74233300 | 3.08065400  | -0.30656100 |
| H | -1.63585700 | 3.33328800  | -1.36895500 |
| H | -2.62207000 | 3.59948700  | 0.07725100  |
| H | -0.86837000 | 3.44857700  | 0.22920000  |
| H | -2.32320600 | 0.87326200  | 1.83262500  |
| C | 1.53105500  | 0.67060400  | 0.11593300  |
| C | 1.79667600  | -0.65171300 | -0.27880300 |
| C | 2.59038000  | 1.50434100  | 0.51893600  |
| C | 3.10309500  | -1.11703800 | -0.28479100 |
| H | 0.99108600  | -1.31309200 | -0.55567300 |
| C | 3.89088300  | 1.03863900  | 0.51927500  |
| H | 2.36691400  | 2.51835600  | 0.82504700  |
| C | 4.14125600  | -0.27435100 | 0.11055300  |
| H | 3.31853100  | -2.13276700 | -0.58555400 |
| H | 4.70799200  | 1.67737300  | 0.82338800  |
| N | 5.50804100  | -0.77160000 | 0.10298700  |
| O | 6.41010900  | -0.01369300 | 0.46450600  |
| O | 5.71105700  | -1.93033000 | -0.26437400 |

**T<sub>2</sub><sup>o</sup>**

|   |             |             |             |
|---|-------------|-------------|-------------|
| C | -0.74602800 | 1.62762600  | -0.22656500 |
| O | 0.36011800  | 1.33131000  | -1.22933800 |
| N | -0.35248400 | 2.51743200  | 0.80391500  |
| O | -1.07423900 | 0.42825100  | 0.40541900  |
| H | -6.68249800 | -0.88007600 | 0.86641500  |
| H | 0.29944400  | 2.06927900  | 1.43741700  |
| O | -2.44563300 | -1.52208400 | -0.95560700 |
| H | -1.99237200 | -2.18097800 | -1.49396500 |
| H | -1.49826600 | -0.20440700 | -0.21846300 |
| O | -4.88767600 | -0.85652400 | -1.94085300 |
| H | -3.28282000 | -1.29587700 | -1.43174600 |
| H | -5.26084400 | -1.30779700 | -2.70590000 |
| O | -2.49558000 | 0.05103900  | 2.80651200  |
| H | -1.92356100 | 0.31191900  | 2.05824100  |
| H | -1.90478600 | -0.07301700 | 3.55750700  |
| O | -3.76113000 | -2.11754000 | 1.54949400  |
| H | -3.22348000 | -2.09226900 | 0.73711100  |
| H | -3.37473800 | -1.41287200 | 2.10886900  |
| O | -6.17527500 | -1.54109500 | 0.38290900  |
| H | -5.37431000 | -1.72727000 | 0.92790800  |
| H | -5.47139100 | -1.07520000 | -1.17822800 |
| C | -1.85203500 | 2.16974300  | -1.11734800 |
| H | -2.71396300 | 2.43058300  | -0.50207800 |
| H | -1.51841200 | 3.05184400  | -1.66272400 |
| H | -2.14249800 | 1.40888000  | -1.84173500 |
| C | 0.05018500  | 3.87723500  | 0.44612100  |
| H | -0.81462300 | 4.45644300  | 0.11835300  |
| H | 0.45204400  | 4.35795900  | 1.33817600  |
| H | 0.81109600  | 3.91799700  | -0.34377000 |
| C | 1.47023300  | 0.66063300  | -0.81557100 |
| C | 1.60329800  | -0.69725500 | -1.14225800 |
| C | 2.51028100  | 1.31772000  | -0.14054000 |
| C | 2.74836300  | -1.39537800 | -0.79470500 |
| H | 0.80341100  | -1.18932800 | -1.68002000 |
| C | 3.65845900  | 0.62518900  | 0.21737600  |
| H | 2.43058000  | 2.37361500  | 0.07831800  |
| C | 3.76388400  | -0.72577200 | -0.11003600 |
| H | 2.86056300  | -2.44115700 | -1.04366800 |
| H | 4.46772200  | 1.12198800  | 0.73368000  |
| N | 4.97304700  | -1.45664500 | 0.26372600  |
| O | 5.85608100  | -0.85428400 | 0.87330400  |
| O | 5.05707400  | -2.64460000 | -0.04584400 |

**TS<sub>18</sub>**

|   |             |            |            |
|---|-------------|------------|------------|
| C | -0.86126400 | 1.77593600 | 0.01319000 |
|---|-------------|------------|------------|

|   |             |             |             |
|---|-------------|-------------|-------------|
| O | 0.40722300  | 1.50023300  | -1.22904400 |
| N | -0.34659600 | 2.49508600  | 1.04812300  |
| O | -1.16564400 | 0.51878200  | 0.41383600  |
| H | -6.53617200 | -1.40493600 | 1.12665200  |
| H | 0.19895200  | 1.94826600  | 1.70104200  |
| O | -2.52358600 | -1.12406900 | -1.22075500 |
| H | -2.09957100 | -1.53903500 | -1.98086700 |
| H | -1.61175600 | -0.00497300 | -0.30052800 |
| O | -5.08536000 | -0.39968800 | -1.69977400 |
| H | -3.42643600 | -0.84141200 | -1.51543200 |
| H | -5.52506600 | -0.62476800 | -2.52696600 |
| O | -2.17497700 | -0.71313000 | 2.80707100  |
| H | -1.72646800 | -0.18612700 | 2.12286900  |
| H | -1.47971500 | -1.00804900 | 3.40590400  |
| O | -3.49181500 | -2.54348800 | 1.11988400  |
| H | -3.05534100 | -2.25366900 | 0.29915500  |
| H | -3.07293800 | -1.99463800 | 1.81318900  |
| O | -6.05340000 | -1.84501800 | 0.41862800  |
| H | -5.18692100 | -2.11721200 | 0.80286800  |
| H | -5.56707900 | -0.88146600 | -0.98824300 |
| C | -1.83947800 | 2.46230400  | -0.90548700 |
| H | -2.72986500 | 2.73045300  | -0.33130500 |
| H | -1.40711500 | 3.36158300  | -1.33920000 |
| H | -2.12315000 | 1.78907600  | -1.71211500 |
| C | 0.04073200  | 3.89490700  | 0.90823900  |
| H | -0.83450000 | 4.52074100  | 0.72930400  |
| H | 0.49818300  | 4.21406500  | 1.84337000  |
| H | 0.75733300  | 4.04718500  | 0.09420500  |
| C | 1.46626300  | 0.79201100  | -0.87726000 |
| C | 1.62470900  | -0.53262800 | -1.35654200 |
| C | 2.48414200  | 1.32531000  | -0.04685700 |
| C | 2.73460200  | -1.28586100 | -1.02842900 |
| H | 0.85571300  | -0.94343900 | -1.99910900 |
| C | 3.59470100  | 0.57315500  | 0.29226500  |
| H | 2.40397200  | 2.34720200  | 0.29958700  |
| C | 3.71615300  | -0.73167500 | -0.19664700 |
| H | 2.85169000  | -2.29507000 | -1.39849400 |
| H | 4.37289600  | 0.98544900  | 0.91969300  |
| N | 4.87788400  | -1.51877400 | 0.15582700  |
| O | 5.72996700  | -1.02019300 | 0.89885800  |
| O | 4.97771400  | -2.66395000 | -0.29721200 |

**(AM<sup>+</sup>o...AL<sup>-</sup>)<sub>1</sub>**

|   |             |             |             |
|---|-------------|-------------|-------------|
| C | -1.39032200 | 2.02164800  | 0.35231200  |
| O | 0.73084600  | 1.68281600  | -1.49949600 |
| N | -0.74061500 | 2.67103100  | 1.28119900  |
| O | -1.52439900 | 0.73920900  | 0.52627700  |
| H | -6.24277200 | -2.37795400 | 1.18002400  |
| H | -0.34296100 | 2.11485600  | 2.02914700  |
| O | -2.67723700 | -0.68286300 | -1.26150800 |
| H | -2.25635100 | -0.78420800 | -2.12384400 |
| H | -1.98779300 | 0.25504800  | -0.24213500 |
| O | -5.32801300 | -0.46505800 | -1.37692900 |
| H | -3.65477000 | -0.55758600 | -1.41411000 |
| H | -5.80273100 | -0.57278500 | -2.20852600 |
| O | -1.82123300 | -1.40496100 | 2.66257500  |
| H | -1.53744000 | -0.61711900 | 2.17676300  |
| H | -1.02895800 | -1.73587900 | 3.10134200  |
| O | -3.07491200 | -2.90532600 | 0.63126100  |
| H | -2.79405800 | -2.33935400 | -0.10691300 |
| H | -2.65266200 | -2.49485700 | 1.41204500  |
| O | -5.78463300 | -2.53297600 | 0.34686500  |
| H | -4.84803100 | -2.73269500 | 0.57936700  |
| H | -5.63285200 | -1.19102000 | -0.78299400 |
| C | -2.03067400 | 2.72478400  | -0.79237200 |
| H | -2.97138200 | 3.16787100  | -0.44924200 |
| H | -1.38614900 | 3.51684300  | -1.16698500 |
| H | -2.24462600 | 2.02452400  | -1.59517900 |
| C | -0.48864300 | 4.11470900  | 1.29836800  |
| H | -1.42384900 | 4.66803400  | 1.21981500  |

|   |             |             |             |
|---|-------------|-------------|-------------|
| H | -0.01464900 | 4.35616600  | 2.24607700  |
| H | 0.17904500  | 4.39556900  | 0.48278500  |
| C | 1.68711000  | 0.95085900  | -1.11270300 |
| C | 1.83909300  | -0.41906900 | -1.55690500 |
| C | 2.69969400  | 1.42538300  | -0.19239400 |
| C | 2.87131800  | -1.21343200 | -1.13078200 |
| H | 1.10033500  | -0.80695700 | -2.25017500 |
| C | 3.73024400  | 0.62717600  | 0.23156000  |
| H | 2.62152500  | 2.44897600  | 0.15781300  |
| C | 3.83463900  | -0.70573900 | -0.22847600 |
| H | 2.96338100  | -2.23474200 | -1.47647200 |
| H | 4.47563300  | 1.00410100  | 0.91966100  |
| N | 4.89481200  | -1.52519900 | 0.21006800  |
| O | 5.74074400  | -1.06344700 | 1.00828500  |
| O | 4.97483600  | -2.70309000 | -0.20467800 |

**(AM<sup>+</sup>...AL<sup>-</sup>)<sub>2</sub>**

|   |             |             |             |
|---|-------------|-------------|-------------|
| C | -2.74742700 | 1.45175500  | 0.01683800  |
| O | 1.11832800  | 0.79895100  | -1.32485400 |
| N | -3.50259600 | 1.51651800  | 1.07534500  |
| O | -2.87024800 | 0.37077700  | -0.70853200 |
| H | -3.96617400 | 0.62357400  | 1.33509200  |
| O | -5.31854100 | -0.74005100 | -1.89198900 |
| H | -5.79547600 | -0.06201800 | -2.38385000 |
| H | -4.52339800 | -0.30398800 | -1.54448500 |
| O | -6.41525700 | -1.97152200 | 0.32882800  |
| H | -6.13422100 | -1.59283400 | -0.53094000 |
| H | -6.58200100 | -2.90635200 | 0.16655700  |
| O | -0.82852100 | -0.73167500 | -1.55766600 |
| H | -1.99657900 | 0.02339300  | -1.17943900 |
| H | -0.86471100 | -1.10625200 | -2.44577100 |
| O | -1.79325400 | -2.24952200 | 0.76669400  |
| H | -1.56628100 | -3.18559200 | 0.77228600  |
| H | -1.38977100 | -1.88129600 | -0.03936400 |
| O | -4.21711200 | -1.10380100 | 1.82712300  |
| H | -3.43519900 | -1.55700300 | 1.45786800  |
| H | -4.99009900 | -1.49294300 | 1.36936300  |
| C | -1.80270700 | 2.52215400  | -0.40473900 |
| H | -2.17215500 | 2.97126600  | -1.33099700 |
| H | -1.68446000 | 3.29526600  | 0.34969700  |
| H | -0.82748700 | 2.07537400  | -0.62225200 |
| C | -3.62208500 | 2.65175300  | 1.99376800  |
| H | -3.72038900 | 3.58549100  | 1.44326800  |
| H | -4.51976200 | 2.50092400  | 2.58929400  |
| H | -2.75914700 | 2.70449000  | 2.65991700  |
| H | 0.04757100  | -0.15240700 | -1.47822100 |
| C | 2.27908900  | 0.47585800  | -0.86886100 |
| C | 3.31542800  | 1.45769300  | -0.74663700 |
| C | 2.60306100  | -0.86026600 | -0.46298400 |
| C | 4.56248900  | 1.13366400  | -0.26793800 |
| H | 3.09039300  | 2.47445800  | -1.04754300 |
| C | 3.85146400  | -1.18322700 | 0.01522300  |
| H | 1.83851600  | -1.62463000 | -0.54168600 |
| C | 4.84438000  | -0.19102700 | 0.11789400  |
| H | 5.33516000  | 1.88600700  | -0.18348400 |
| H | 4.08171600  | -2.19620100 | 0.31694100  |
| N | 6.13664200  | -0.52768900 | 0.61291500  |
| O | 6.37149700  | -1.70368700 | 0.94512900  |
| O | 7.00229400  | 0.36169600  | 0.70208600  |

**T<sub>4</sub><sup>±</sup>**

|   |            |             |             |
|---|------------|-------------|-------------|
| C | 1.19052200 | -0.32257400 | 0.84953900  |
| O | 0.07780700 | 0.73457400  | 0.39576500  |
| N | 2.37823500 | 0.69965400  | 0.95854000  |
| O | 1.44082700 | -1.20716800 | -0.02415800 |
| H | 3.20972900 | 0.12067800  | 1.19800700  |
| H | 2.56289900 | 1.05182900  | -0.00333800 |
| O | 2.97716400 | -1.13886300 | -2.17124900 |
| H | 2.58957500 | -1.63354700 | -2.90161000 |
| H | 2.33661100 | -1.19014300 | -1.40556400 |

|   |             |             |             |
|---|-------------|-------------|-------------|
| O | 0.50707900  | 2.71782500  | -1.75827400 |
| H | -0.16325200 | 2.62684600  | -2.44479500 |
| H | 0.24985500  | 2.09742400  | -1.05510000 |
| O | 3.06928300  | 1.62925900  | -1.69102900 |
| H | 2.23983800  | 2.06256300  | -1.96842500 |
| H | 3.07669200  | 0.75651700  | -2.12637500 |
| O | 5.36511800  | -1.82932700 | -0.96932700 |
| H | 4.56981800  | -1.62389200 | -1.50873300 |
| H | 6.11627800  | -1.46885200 | -1.45309000 |
| O | 4.78244700  | -0.74253800 | 1.49252200  |
| H | 5.06193800  | -1.16906600 | 0.65061000  |
| H | 4.81485100  | -1.43237300 | 2.16427800  |
| C | 0.78849000  | -0.78756000 | 2.24687700  |
| H | 1.63229100  | -1.32052700 | 2.69114000  |
| H | 0.49236700  | 0.02995500  | 2.90374900  |
| H | -0.04091300 | -1.48824200 | 2.15879300  |
| C | 2.29159500  | 1.85022100  | 1.89985600  |
| H | 2.28898300  | 1.48765600  | 2.92503000  |
| H | 3.16479400  | 2.48336400  | 1.74551700  |
| H | 1.38467600  | 2.41328900  | 1.69782600  |
| C | -1.20479100 | 0.34191500  | 0.25930600  |
| C | -1.59701400 | -0.96632900 | -0.08749800 |
| C | -2.19036600 | 1.33305100  | 0.44031700  |
| C | -2.94000200 | -1.26928500 | -0.23702800 |
| H | -0.84397000 | -1.72341700 | -0.24915700 |
| C | -3.53033800 | 1.03362000  | 0.28034600  |
| H | -1.88156300 | 2.33432800  | 0.71389400  |
| C | -3.90022400 | -0.27175700 | -0.05534100 |
| H | -3.24904800 | -2.27002300 | -0.50513700 |
| H | -4.28791000 | 1.79151800  | 0.42231800  |
| N | -5.30631500 | -0.59534200 | -0.22008300 |
| O | -6.13893300 | 0.30221700  | -0.07060100 |
| O | -5.61519200 | -1.75521500 | -0.50330800 |

**TS<sub>19</sub>**

|   |             |             |             |
|---|-------------|-------------|-------------|
| C | 1.25565900  | -0.33330000 | 0.89958400  |
| O | 0.03513300  | 0.79462900  | 0.27901300  |
| N | 2.38591200  | 0.72400100  | 0.92467000  |
| O | 1.48488500  | -1.25262600 | 0.09158200  |
| H | 3.24455200  | 0.19278300  | 1.19292100  |
| H | 2.55466700  | 1.02133500  | -0.06086000 |
| O | 3.05416400  | -1.30816200 | -2.09590500 |
| H | 2.69515300  | -1.86923000 | -2.79240300 |
| H | 2.41569300  | -1.34009000 | -1.33900100 |
| O | 0.52355300  | 2.59778500  | -1.89166600 |
| H | -0.14330800 | 2.46395900  | -2.57428200 |
| H | 0.26566600  | 2.01660800  | -1.14990100 |
| O | 3.05769200  | 1.49653900  | -1.75067500 |
| H | 2.22989700  | 1.91468400  | -2.05917200 |
| H | 3.08676000  | 0.61240200  | -2.15884900 |
| O | 5.47384700  | -1.80898000 | -0.83998000 |
| H | 4.67672200  | -1.67692300 | -1.39725300 |
| H | 6.21318900  | -1.44822000 | -1.34152400 |
| O | 4.81783800  | -0.58804100 | 1.53403500  |
| H | 5.12608700  | -1.05731900 | 0.72511900  |
| H | 4.87008400  | -1.22872200 | 2.25177600  |
| C | 0.73871700  | -0.64327200 | 2.29139600  |
| H | 1.54214100  | -1.13055300 | 2.85143300  |
| H | 0.40869900  | 0.24007200  | 2.83453500  |
| H | -0.08870300 | -1.34638800 | 2.21048600  |
| C | 2.26715600  | 1.92447000  | 1.79939700  |
| H | 2.29870200  | 1.62208700  | 2.84350000  |
| H | 3.11290800  | 2.57809100  | 1.58945800  |
| H | 1.33493800  | 2.43678500  | 1.58108100  |
| C | -1.23352000 | 0.40315100  | 0.18440900  |
| C | -1.62120100 | -0.92920500 | -0.09583200 |
| C | -2.24406400 | 1.38266400  | 0.33866600  |
| C | -2.95870400 | -1.26183300 | -0.20615700 |
| H | -0.86027400 | -1.68365500 | -0.23593000 |
| C | -3.57953600 | 1.05303900  | 0.21861700  |

|   |             |             |             |
|---|-------------|-------------|-------------|
| H | -1.94963900 | 2.40175700  | 0.55810300  |
| C | -3.93630000 | -0.27340900 | -0.05086900 |
| H | -3.25526000 | -2.27870800 | -0.42360300 |
| H | -4.34821500 | 1.80367100  | 0.33970200  |
| N | -5.33329500 | -0.62549000 | -0.17385500 |
| O | -6.18251600 | 0.26228000  | -0.04151100 |
| O | -5.63059800 | -1.80190400 | -0.40693400 |

**(AM<sup>+</sup>N...AL<sup>-</sup>)<sub>1</sub>**

|   |             |             |             |
|---|-------------|-------------|-------------|
| C | 2.03867300  | -1.24224300 | -0.49287800 |
| O | -0.49174200 | 0.66298200  | -0.34472500 |
| N | 2.43408400  | -0.65798100 | 0.82207200  |
| O | 2.57950500  | -0.79401700 | -1.46816600 |
| H | 3.36849300  | -1.09967300 | 1.07717400  |
| H | 2.66503200  | 0.36860800  | 0.66434500  |
| O | 4.69944000  | 1.15675500  | -1.68053400 |
| H | 4.92070900  | 1.55750100  | -2.52953700 |
| H | 4.01254900  | 0.49135200  | -1.85857100 |
| O | 0.63418400  | 3.02013300  | 0.09556800  |
| H | 0.43941700  | 3.59015000  | -0.65580600 |
| H | 0.14146400  | 2.16472500  | -0.06493400 |
| O | 3.09391700  | 1.97737000  | 0.52598300  |
| H | 2.26885500  | 2.47447400  | 0.30844200  |
| H | 3.67186100  | 2.02355200  | -0.25469200 |
| O | 6.59342500  | -0.17258600 | -0.09354700 |
| H | 6.02909300  | 0.36383800  | -0.68678000 |
| H | 7.19321800  | 0.44694400  | 0.33672900  |
| O | 4.89973800  | -1.61310600 | 1.48160000  |
| H | 5.57740400  | -1.13640400 | 0.94456300  |
| H | 5.10031400  | -2.55308500 | 1.40883200  |
| C | 1.07534400  | -2.37698800 | -0.46955600 |
| H | 1.47261200  | -3.19014700 | 0.14523400  |
| H | 0.12724000  | -2.05873200 | -0.03356000 |
| H | 0.91704200  | -2.72684200 | -1.48675700 |
| C | 1.48797600  | -0.78159600 | 1.97355800  |
| H | 1.34989300  | -1.82804600 | 2.23383100  |
| H | 1.93422700  | -0.25580700 | 2.81543100  |
| H | 0.54342600  | -0.31796000 | 1.69891300  |
| C | -1.75069400 | 0.44729300  | -0.25377800 |
| C | -2.39060800 | -0.59910000 | -1.00541500 |
| C | -2.60275900 | 1.22723800  | 0.60451800  |
| C | -3.73865900 | -0.84313000 | -0.90484800 |
| H | -1.77686800 | -1.19542600 | -1.67079500 |
| C | -3.95045700 | 0.98133300  | 0.70371700  |
| H | -2.15106200 | 2.02428100  | 1.18438600  |
| C | -4.53609900 | -0.05793000 | -0.04766600 |
| H | -4.20213200 | -1.63288200 | -1.48104900 |
| H | -4.57451800 | 1.57667100  | 1.35689700  |
| N | -5.92881900 | -0.31157000 | 0.05655300  |
| O | -6.62155200 | 0.39311700  | 0.81652200  |
| O | -6.43209200 | -1.23433400 | -0.61377200 |

**(AM<sup>+</sup>N...AL<sup>-</sup>)<sub>2</sub>**

|   |             |             |             |
|---|-------------|-------------|-------------|
| C | -2.76995500 | -1.21873200 | 0.94511200  |
| O | 0.70618900  | 0.27442900  | 0.07295900  |
| N | -2.95166300 | -0.92779000 | -0.50723400 |
| O | -3.64170500 | -0.82684700 | 1.67628200  |
| H | -3.92756900 | -1.23475300 | -0.77348700 |
| H | -2.99308400 | 0.14775100  | -0.58513700 |
| O | -5.19473200 | 1.60138300  | 1.27473600  |
| H | -5.43122000 | 2.17406600  | 2.01471600  |
| H | -4.81483500 | 0.79457800  | 1.66065900  |
| O | -0.61367800 | 2.56121300  | -0.10228000 |
| H | -0.43764900 | 3.08943100  | 0.68345700  |
| H | -0.06481200 | 1.72729900  | -0.01151000 |
| O | -3.11332800 | 1.74075500  | -0.67047200 |
| H | -2.24328500 | 2.13725800  | -0.41202000 |
| H | -3.76952900 | 2.00076200  | -0.00015200 |
| O | -7.05774000 | 0.57013900  | -0.54858600 |
| H | -6.49910100 | 1.05428400  | 0.09205700  |

|   |             |             |             |
|---|-------------|-------------|-------------|
| H | -7.31863700 | 1.21445400  | -1.21602600 |
| O | -5.49908400 | -1.53395900 | -1.35419900 |
| H | -6.12320600 | -0.81460700 | -1.09908000 |
| H | -5.92941400 | -2.36474600 | -1.12322600 |
| C | -1.51854000 | -1.90615500 | 1.35594900  |
| H | -1.42308600 | -2.87256300 | 0.85417400  |
| H | -0.65849500 | -1.29166800 | 1.05520800  |
| H | -1.52935900 | -2.04642700 | 2.43427000  |
| C | -1.95597700 | -1.45265700 | -1.48945900 |
| H | -1.96534700 | -2.54016500 | -1.48254900 |
| H | -2.25497300 | -1.09510900 | -2.47308700 |
| H | -0.96802300 | -1.06917200 | -1.24120500 |
| C | 1.98266800  | 0.18827700  | 0.02797300  |
| C | 2.65381900  | -1.07814700 | 0.15264400  |
| C | 2.82627200  | 1.34112400  | -0.14897900 |
| C | 4.02262900  | -1.17981800 | 0.11119100  |
| H | 2.04375600  | -1.96463500 | 0.28427600  |
| C | 4.19501800  | 1.23665100  | -0.19065200 |
| H | 2.35305400  | 2.31116500  | -0.25086600 |
| C | 4.81253300  | -0.02408000 | -0.06019700 |
| H | 4.50859400  | -2.14150200 | 0.20876700  |
| H | 4.81189000  | 2.11543600  | -0.32376800 |
| N | 6.22680000  | -0.12932900 | -0.10097300 |
| O | 6.91084800  | 0.90175200  | -0.25503700 |
| O | 6.75885800  | -1.25075500 | 0.01819700  |

**TS<sub>20</sub>**

|   |             |             |             |
|---|-------------|-------------|-------------|
| C | -2.65202100 | -1.21907800 | 0.94528200  |
| O | 0.85612000  | 0.31938200  | 0.07305800  |
| N | -2.81360100 | -0.92569400 | -0.45851200 |
| O | -3.54684700 | -0.88031000 | 1.69574300  |
| H | -3.79413100 | -1.15228500 | -0.73684100 |
| H | -2.82801900 | 0.35613400  | -0.55085200 |
| O | -4.95488600 | 1.54798600  | 1.22308000  |
| H | -5.11125700 | 2.15234100  | 1.95886800  |
| H | -4.63820600 | 0.70986000  | 1.60961000  |
| O | -0.55679600 | 2.48629700  | -0.12617100 |
| H | -0.43220100 | 3.03897600  | 0.65305600  |
| H | 0.05936200  | 1.68889400  | -0.02544800 |
| O | -2.90802200 | 1.57739100  | -0.62817200 |
| H | -2.01193100 | 1.99919300  | -0.38583700 |
| H | -3.59238300 | 1.84839000  | 0.02342400  |
| O | -6.97273800 | 0.64492200  | -0.52426900 |
| H | -6.37021500 | 1.10270000  | 0.09366800  |
| H | -7.25423000 | 1.30911500  | -1.16325400 |
| O | -5.42139600 | -1.45057800 | -1.41131700 |
| H | -6.04860700 | -0.74385500 | -1.13856400 |
| H | -5.85473100 | -2.28721200 | -1.20974000 |
| C | -1.37437400 | -1.84817600 | 1.39123400  |
| H | -1.24508300 | -2.82742900 | 0.92194300  |
| H | -0.52834200 | -1.22220000 | 1.08060100  |
| H | -1.39011200 | -1.95776300 | 2.47318800  |
| C | -1.84712900 | -1.47805400 | -1.44471100 |
| H | -1.86754700 | -2.56766700 | -1.44514400 |
| H | -2.14304100 | -1.11674400 | -2.42857600 |
| H | -0.84555800 | -1.11712700 | -1.21653300 |
| C | 2.13323100  | 0.22662200  | 0.02954600  |
| C | 2.79182300  | -1.04516500 | 0.15423500  |
| C | 2.98401500  | 1.37270800  | -0.14490800 |
| C | 4.15981700  | -1.15847600 | 0.11412500  |
| H | 2.17342600  | -1.92594900 | 0.28438200  |
| C | 4.35227000  | 1.25676000  | -0.18554800 |
| H | 2.51880200  | 2.34683700  | -0.24565200 |
| C | 4.95847200  | -0.00902200 | -0.05571000 |
| H | 4.63773700  | -2.12417700 | 0.21131600  |
| H | 4.97663100  | 2.13042700  | -0.31709400 |
| N | 6.37278000  | -0.12630600 | -0.09568600 |
| O | 7.06497400  | 0.89880000  | -0.24905900 |
| O | 6.89443500  | -1.25203700 | 0.02355600  |





**Table S4.** Calculated energies (a.u) of stationary points for the methylamine + methylacetate reaction at different levels of theory. MP2/aug-cc-pVTZ calculations are carried out on B3LYP/6-311+G(d,p) optimized geometries.

|                                                                 | <b>E</b> <sub>B3LYP/6-311+G(d,p)</sub> | <b>E</b> <sub>MP2/aug-cc-PVTZ</sub> | <b>ZPE</b> <sub>B3LYP/6-311+G(d,p)</sub> | <b>H</b> <sub>B3LYP/6-311+G(d,p)</sub> | <b>TΔS</b> <sub>B3LYP/6-311+G(d,p)</sub> | <b>G</b> <sub>B3LYP/6-311+G(d,p)</sub> | <b>G</b> <sub>MP2/aug-cc-PVTZ</sub> |
|-----------------------------------------------------------------|----------------------------------------|-------------------------------------|------------------------------------------|----------------------------------------|------------------------------------------|----------------------------------------|-------------------------------------|
| <b>RC</b>                                                       | -746.756613                            | -745.336070                         | -746.478127                              | -746.451358                            | 0.089114                                 | -746.540472                            | -745.119928                         |
| <b>TS(RC-T<sub>1</sub><sup>‡</sup>)</b>                         | -746.741750                            | -745.337222                         | -746.460033                              | -746.436905                            | 0.073567                                 | -746.510472                            | -745.105944                         |
| <b>T<sub>1</sub><sup>‡</sup></b>                                | -746.742324                            | -745.341883                         | -746.459004                              | -746.436037                            | 0.072699                                 | -746.508736                            | -745.108295                         |
| <b>T<sub>2</sub><sup>‡</sup></b>                                | -746.742324                            | -745.341882                         | -746.459002                              | -746.436035                            | 0.072689                                 | -746.508724                            | -745.108282                         |
| <b>TS<sub>1</sub></b>                                           | -746.713552                            | -745.317716                         | -746.434324                              | -746.414093                            | 0.065983                                 | -746.480076                            | -745.084240                         |
| <b>(T<sup>-</sup>...H<sub>3</sub>O<sup>+</sup>)<sub>1</sub></b> | -746.713552                            | -745.317710                         | -746.434292                              | -746.414063                            | 0.065976                                 | -746.480039                            | -745.084197                         |
| <b>TS<sub>2</sub></b>                                           | -746.713472                            | -745.317611                         | -746.434540                              | -746.414319                            | 0.065923                                 | -746.480242                            | -745.084381                         |
| <b>T<sub>3</sub><sup>0</sup></b>                                | -746.742125                            | -745.343888                         | -746.458634                              | -746.435825                            | 0.072026                                 | -746.507851                            | -745.109614                         |
| <b>T<sup>-</sup></b>                                            | -746.262600                            | -744.868057                         | -745.993594                              | -745.971042                            | 0.072824                                 | -746.043866                            | -744.649323                         |
| <b>TS<sub>3</sub></b>                                           | -746.256940                            | -744.854639                         | -745.991066                              | -745.968168                            | 0.073471                                 | -746.041639                            | -744.639339                         |
| <b>AM...AL<sup>-</sup></b>                                      | -746.296319                            | -744.879784                         | -746.033200                              | -746.007737                            | 0.087433                                 | -746.095170                            | -744.678635                         |
| <b>(T<sup>-</sup>...H<sub>3</sub>O<sup>+</sup>)<sub>2</sub></b> | -746.711171                            | -745.314867                         | -746.431884                              | -746.410280                            | 0.069761                                 | -746.480041                            | -745.083737                         |
| <b>TS<sub>4</sub></b>                                           | -746.699054                            | -745.293237                         | -746.421823                              | -746.399808                            | 0.070687                                 | -746.470495                            | -745.064678                         |
| <b>(AM...AL)<sub>1</sub></b>                                    | -746.770178                            | -745.349826                         | -746.491940                              | -746.465203                            | 0.089566                                 | -746.554769                            | -745.134417                         |
| <b>T<sub>3</sub><sup>‡</sup></b>                                | -746.737069                            | -745.341882                         | -746.455234                              | -746.431478                            | 0.076415                                 | -746.507893                            | -745.112706                         |
| <b>TS<sub>5</sub></b>                                           | -746.716909                            | -745.318396                         | -746.439680                              | -746.416731                            | 0.074173                                 | -746.490904                            | -745.092390                         |
| <b>T<sub>1</sub><sup>0</sup></b>                                | -746.735200                            | -745.342583                         | -746.453715                              | -746.429593                            | 0.076971                                 | -746.506564                            | -745.113947                         |
| <b>T<sub>2</sub><sup>0</sup></b>                                | -746.730484                            | -745.327352                         | -746.450090                              | -746.425568                            | 0.078162                                 | -746.503730                            | -745.100598                         |
| <b>TS<sub>6</sub></b>                                           | -746.713172                            | -745.303526                         | -746.437182                              | -746.413447                            | 0.075555                                 | -746.489002                            | -745.079356                         |
| <b>(AM...AL)<sub>2</sub></b>                                    | -746.772189                            | -745.353049                         | -746.493886                              | -746.467514                            | 0.087451                                 | -746.554965                            | -745.135825                         |
| <b>T<sub>4</sub><sup>‡</sup></b>                                | -746.735921                            | -745.340713                         | -746.453808                              | -746.430444                            | 0.073933                                 | -746.504377                            | -745.109169                         |
| <b>TS<sub>7</sub></b>                                           | -746.710983                            | -745.302966                         | -746.435715                              | -746.412282                            | 0.074521                                 | -746.486803                            | -745.078786                         |
| <b>(AM...AL)<sub>3</sub></b>                                    | -746.768269                            | -745.354128                         | -746.491104                              | -746.464004                            | 0.092711                                 | -746.556715                            | -745.142574                         |

**Table S5.** Calculated energies (a.u) of stationary points for the methylamine + phenylacetate reaction at different levels of theory. MP2/aug-cc-pVTZ calculations are carried out on B3LYP/6-311+G(d,p) optimized geometries.

|                                                                  | <b>E</b> <sub>B3LYP/6-311+G(d,p)</sub> | <b>E</b> <sub>MP2/aug-cc-pVTZ</sub> | <b>ZPE</b> <sub>B3LYP/6-311+G(d,p)</sub> | <b>H</b> <sub>B3LYP/6-311+G(d,p)</sub> | <b>TΔS</b> <sub>B3LYP/6-311+G(d,p)</sub> | <b>G</b> <sub>B3LYP/6-311+G(d,p)</sub> | <b>G</b> <sub>MP2/aug-cc-pVTZ</sub> |
|------------------------------------------------------------------|----------------------------------------|-------------------------------------|------------------------------------------|----------------------------------------|------------------------------------------|----------------------------------------|-------------------------------------|
| <b>RC</b>                                                        | -938.539121                            | -936.676970                         | -938.209198                              | -938.179177                            | 0.099010                                 | -938.278187                            | -936.413920                         |
| <b>TS(RC-T<sub>1</sub><sup>‡</sup>)</b>                          | -938.526778                            | -936.679586                         | -938.193393                              | -938.166958                            | 0.083079                                 | -938.250037                            | -936.402845                         |
| <b>T<sub>1</sub><sup>‡</sup></b>                                 | -938.529109                            | -936.687252                         | -938.193560                              | -938.167580                            | 0.082269                                 | -938.249849                            | -936.406730                         |
| <b>T<sub>2</sub><sup>‡</sup></b>                                 | -938.529009                            | -936.688645                         | -938.193429                              | -938.167520                            | 0.080927                                 | -938.248447                            | -936.408084                         |
| <b>T<sup>-</sup></b>                                             | -938.054329                            | -936.219011                         | -937.733320                              | -937.707454                            | 0.081069                                 | -937.788523                            | -935.953205                         |
| <b>TS<sub>8</sub></b>                                            | -938.051964                            | -936.210755                         | -937.732541                              | -937.706313                            | 0.082983                                 | -937.789296                            | -935.948087                         |
| <b>AM...AL<sup>-</sup></b>                                       | -938.089911                            | -936.230260                         | -937.771646                              | -937.743583                            | 0.092675                                 | -937.836258                            | -935.976607                         |
| <b>TS<sub>9</sub></b>                                            | -938.500700                            | -936.663530                         | -938.169108                              | -938.145613                            | 0.074790                                 | -938.220403                            | -936.383234                         |
| <b>T...H<sub>3</sub>O<sup>+</sup></b>                            | -938.500732                            | -936.663613                         | -938.168213                              | -938.143970                            | 0.076593                                 | -938.220563                            | -936.383444                         |
| <b>TS<sub>10</sub></b>                                           | -938.497145                            | -936.653714                         | -938.164957                              | -938.140429                            | 0.077781                                 | -938.218210                            | -936.374779                         |
| <b>AM...H<sub>3</sub>O<sup>+</sup>...AL<sup>-</sup></b>          | -938.519470                            | -936.654465                         | -938.188626                              | -938.161451                            | 0.088878                                 | -938.250329                            | -936.385324                         |
| <b>(AM...AL)<sub>1</sub></b>                                     | -938.565440                            | -936.697861                         | -938.235335                              | -938.205876                            | 0.099994                                 | -938.305870                            | -936.438291                         |
| <b>T<sub>3</sub><sup>‡</sup></b>                                 | -938.527285                            | -936.683245                         | -938.192782                              | -938.166284                            | 0.083429                                 | -938.249713                            | -936.405673                         |
| <b>TS<sub>11</sub></b>                                           | -938.505653                            | -936.665609                         | -938.176762                              | -938.151122                            | 0.081161                                 | -938.232283                            | -936.392239                         |
| <b>T<sub>1</sub><sup>0</sup></b>                                 | -938.525099                            | -936.682517                         | -938.191409                              | -938.164533                            | 0.084876                                 | -938.249409                            | -936.406826                         |
| <b>T<sub>2</sub><sup>0</sup></b>                                 | -938.526633                            | -936.682561                         | -938.192763                              | -938.166062                            | 0.085631                                 | -938.251693                            | -936.407622                         |
| <b>TS<sub>12</sub></b>                                           | -938.515881                            | -936.660885                         | -938.184385                              | -938.157247                            | 0.085760                                 | -938.243007                            | -936.388011                         |
| <b>AM<sup>+</sup><sub>O</sub>...AL<sup>-</sup></b>               | -938.516385                            | -936.658870                         | -938.185394                              | -938.157003                            | 0.090456                                 | -938.247459                            | -936.389944                         |
| <b>T<sub>4</sub><sup>‡</sup></b>                                 | -938.524096                            | -936.682614                         | -938.190189                              | -938.163550                            | 0.083265                                 | -938.246815                            | -936.405333                         |
| <b>TS<sub>13</sub></b>                                           | -938.519536                            | -936.672033                         | -938.187151                              | -938.160625                            | 0.083443                                 | -938.244068                            | -936.396565                         |
| <b>(AM<sup>+</sup><sub>N</sub>...AL<sup>-</sup>)<sub>1</sub></b> | -938.520623                            | -936.667789                         | -938.188927                              | -938.161578                            | 0.085841                                 | -938.247419                            | -936.394585                         |
| <b>(AM<sup>+</sup><sub>N</sub>...AL<sup>-</sup>)<sub>2</sub></b> | -938.520639                            | -936.662859                         | -938.189865                              | -938.162512                            | 0.087232                                 | -938.249744                            | -936.391964                         |
| <b>TS<sub>14</sub></b>                                           | -938.517735                            | -936.660063                         | -938.191912                              | -938.165271                            | 0.086365                                 | -938.251636                            | -936.393964                         |

**Table S6.** Calculated energies (a.u) of stationary points for the methylamine + *p*-nitrophenyl acetate reaction at different levels of theory. MP2/aug-cc-pVTZ calculations are carried out on B3LYP/6-311+G(d,p) optimized geometries.

|                                                                  | <b>E</b> <sub>B3LYP/6-311+G(d,p)</sub> | <b>E</b> <sub>MP2/aug-cc-pVTZ</sub> | <b>ZPE</b> <sub>B3LYP/6-311+G(d,p)</sub> | <b>H</b> <sub>B3LYP/6-311+G(d,p)</sub> | <b>TΔS</b> <sub>B3LYP/6-311+G(d,p)</sub> | <b>G</b> <sub>B3LYP/6-311+G(d,p)</sub> | <b>G</b> <sub>MP2/aug-cc-pVTZ</sub> |
|------------------------------------------------------------------|----------------------------------------|-------------------------------------|------------------------------------------|----------------------------------------|------------------------------------------|----------------------------------------|-------------------------------------|
| <b>RC</b>                                                        | -1143.104901                           | -1140.914703                        | -1142.772662                             | -1142.740125                           | 0.105098                                 | -1142.845223                           | -1140.655909                        |
| <b>TS(RC-T<sub>1</sub><sup>‡</sup>)</b>                          | -1143.095665                           | -1140.918049                        | -1142.760488                             | -1142.731130                           | 0.090917                                 | -1142.822047                           | -1140.644430                        |
| <b>T<sub>1</sub><sup>‡</sup></b>                                 | -1143.102297                           | -1140.929539                        | -1142.764258                             | -1142.735723                           | 0.088389                                 | -1142.824112                           | -1140.653711                        |
| <b>T<sub>2</sub><sup>‡</sup></b>                                 | -1143.102210                           | -1140.929509                        | -1142.764339                             | -1142.735722                           | 0.088446                                 | -1142.824168                           | -1140.651467                        |
| <b>TS<sub>15</sub></b>                                           | -1143.079635                           | -1140.907072                        | -1142.745893                             | -1142.719370                           | 0.082883                                 | -1142.802253                           | -1140.629690                        |
| <b>T...H<sub>3</sub>O<sup>+</sup></b>                            | -1143.079635                           | -1140.907072                        | -1142.745893                             | -1142.719370                           | 0.082884                                 | -1142.802254                           | -1140.629690                        |
| <b>TS<sub>16</sub></b>                                           | -1143.079596                           | -1140.905026                        | -1142.745257                             | -1142.718555                           | 0.083223                                 | -1142.801778                           | -1140.627208                        |
| <b>AM...H<sub>3</sub>O<sup>+</sup>...AL<sup>-</sup></b>          | -1143.111074                           | -1140.910685                        | -1142.777722                             | -1142.747818                           | 0.097267                                 | -1142.845085                           | -1140.644696                        |
| <b>(AM..AL)<sub>1</sub></b>                                      | -1143.139755                           | -1140.944955                        | -1142.807279                             | -1142.775455                           | 0.104107                                 | -1142.879562                           | -1140.684762                        |
| <b>T<sub>3</sub><sup>‡</sup></b>                                 | -1143.100874                           | -1140.926295                        | -1142.764491                             | -1142.735228                           | 0.090571                                 | -1142.825799                           | -1140.651220                        |
| <b>TS<sub>17</sub></b>                                           | -1143.077354                           | -1140.907572                        | -1142.747550                             | -1142.719269                           | 0.087584                                 | -1142.806853                           | -1140.637071                        |
| <b>T<sub>1</sub><sup>0</sup></b>                                 | -1143.096652                           | -1140.923869                        | -1142.760891                             | -1142.731359                           | 0.090909                                 | -1142.822268                           | -1140.649486                        |
| <b>T<sub>2</sub><sup>0</sup></b>                                 | -1143.096678                           | -1140.922819                        | -1142.761007                             | -1142.731556                           | 0.092567                                 | -1142.824123                           | -1140.650264                        |
| <b>TS<sub>18</sub></b>                                           | -1143.094315                           | -1140.913005                        | -1142.760151                             | -1142.730633                           | 0.093385                                 | -1142.824018                           | -1140.642708                        |
| <b>(AM<sup>+</sup><sub>o</sub>...AL<sup>-</sup>)<sub>1</sub></b> | -1143.106878                           | -1140.910866                        | -1142.773877                             | -1142.742547                           | 0.101181                                 | -1142.843728                           | -1140.647716                        |
| <b>(AM<sup>+</sup><sub>o</sub>...AL<sup>-</sup>)<sub>2</sub></b> | -1143.116478                           | -1140.920993                        | -1142.785971                             | -1142.754954                           | 0.098423                                 | -1142.853377                           | -1140.657892                        |
| <b>T<sub>4</sub><sup>‡</sup></b>                                 | -1143.096232                           | -1140.924017                        | -1142.760332                             | -1142.730794                           | 0.090104                                 | -1142.820898                           | -1140.648683                        |
| <b>TS<sub>19</sub></b>                                           | -1143.095857                           | -1140.920419                        | -1142.760288                             | -1142.731353                           | 0.088653                                 | -1142.820006                           | -1140.644568                        |
| <b>(AM<sup>+</sup><sub>N</sub>...AL<sup>-</sup>)<sub>1</sub></b> | -1143.106214                           | -1140.916327                        | -1142.772333                             | -1142.742073                           | 0.094578                                 | -1142.836651                           | -1140.646764                        |
| <b>(AM<sup>+</sup><sub>N</sub>...AL<sup>-</sup>)<sub>2</sub></b> | -1143.107104                           | -1140.913938                        | -1142.773788                             | -1142.743493                           | 0.095416                                 | -1142.838909                           | -1140.645744                        |
| <b>TS<sub>20</sub></b>                                           | -1143.103657                           | -1140.911158                        | -1142.774280                             | -1142.744878                           | 0.093681                                 | -1142.838559                           | -1140.646060                        |

**Table S7.** Calculated imaginary frequencies at B3LYP/6-311+G(d,p) level for all the transition structures reported in this work (cm<sup>-1</sup>).

methyl acetate, MA

|                                          |                |
|------------------------------------------|----------------|
| <b>TS(RC- T<sub>1</sub><sup>‡</sup>)</b> | 191.0 <i>i</i> |
| <b>TS<sub>1</sub></b>                    | 64.8 <i>i</i>  |
| <b>TS<sub>2</sub></b>                    | 191.3 <i>i</i> |
| <b>TS<sub>3</sub></b>                    | 207.6 <i>i</i> |
| <b>TS<sub>4</sub></b>                    | 207.8 <i>i</i> |
| <b>TS<sub>5</sub></b>                    | 611.9 <i>i</i> |
| <b>TS<sub>6</sub></b>                    | 318.9 <i>i</i> |
| <b>TS<sub>7</sub></b>                    | 715.3 <i>i</i> |

phenyl acetate, PA

|                                          |                |
|------------------------------------------|----------------|
| <b>TS(RC- T<sub>1</sub><sup>‡</sup>)</b> | 203.0 <i>i</i> |
| <b>TS<sub>8</sub></b>                    | 202.5 <i>i</i> |
| <b>TS<sub>9</sub></b>                    | 174.0 <i>i</i> |
| <b>TS<sub>10</sub></b>                   | 200.8 <i>i</i> |
| <b>TS<sub>11</sub></b>                   | 861.0 <i>i</i> |
| <b>TS<sub>12</sub></b>                   | 129.1 <i>i</i> |
| <b>TS<sub>13</sub></b>                   | 104.2 <i>i</i> |
| <b>TS<sub>14</sub></b>                   | 921.0 <i>i</i> |

*p*-nitrophenyl acetate, PNPA

|                                          |                 |
|------------------------------------------|-----------------|
| <b>TS(RC- T<sub>1</sub><sup>‡</sup>)</b> | 193.8 <i>i</i>  |
| <b>TS<sub>15</sub></b>                   | 115.5 <i>i</i>  |
| <b>TS<sub>16</sub></b>                   | 111.2 <i>i</i>  |
| <b>TS<sub>17</sub></b>                   | 1357.2 <i>i</i> |
| <b>TS<sub>18</sub></b>                   | 272.0 <i>i</i>  |
| <b>TS<sub>19</sub></b>                   | 147.3 <i>i</i>  |
| <b>TS<sub>20</sub></b>                   | 930.5 <i>i</i>  |
